# Supplementary material for: Influence of Geomagnetic Disturbances at Different Times of Day on Locomotor Activity in Zebrafish (Danio Rerio)
Source: Clocks Sleep. 2021 Nov 29;3(4):624–32. doi: 10.3390/clockssleep3040045 (PMC8700499; doi:10.3390/clockssleep3040045)
Supplement: Supplementary file 1 [file clockssleep-03-00045-s001.zip]

Archive with 5 entries (5 files):
- means_from_each_fish.xlsx
- Suppl(11_09-15_09).xlsx
- Suppl(29_08-02_09).xlsx
- Suppl(31_07-04_08).xlsx
- Supplementary Figure S1.pdf
