# Supplementary material for: Influence of Geomagnetic Disturbances at Different Times of Day on Locomotor Activity in Zebrafish (Danio Rerio)
Source: Clocks Sleep. 2021 Nov 29;3(4):624–32. doi: 10.3390/clockssleep3040045 (PMC8700499; doi:10.3390/clockssleep3040045)
Supplement: Supplementary file 1 [file clockssleep-03-00045-s001.zip › means_from_each_fish.xlsx]

## Sheet: before
means (event "before")	Avg. swimming speed (cm/s)	control	events	Freezing time (%)	control	events	Swimming time (%)	control	events	Rapid movement time (%)	control	events	Meandering (°/cm)	control	events	"Walls/Inner area" ratio	control	events
fish#1		0.761026	0.752743		73.5098	72.8971		26.4482	27.0576		0.042005	0.0452652		119.31	76.7639		0.613291	0.572462
fish#2		0.665812	0.391627		80.2029	90.7841		19.6978	9.16806		0.0992187	0.0478927		56.5371	68.34		0.264877	0.0926735
fish#3		0.672379	0.345418		79.2444	90.5471		20.6727	9.44167		0.0829626	0.0111857		59.1436	80.0463		0.573672	0.490259
fish#4		0.890387	0.686445		71.7365	78.3286		28.1343	21.5264		0.129149	0.145011		69.2265	73.1928		0.359064	0.619122
fish#5		2.27561	0.346209		41.753	93.6321		56.6064	6.24539		1.64052	0.122504		63.163	101.927		0.573015	0.0766182
fish#6		1.13794	0.684869		68.2122	81.3075		31.4694	18.4071		0.318408	0.285336		76.4938	57.8718		0.288011	0.182952
fish#7		0.775017	0.643714		78.2399	84.0094		21.6151	15.8012		0.144996	0.189454		54.4204	61.2096		0.30217	0.340129
fish#8		1.60762	0.935566		54.276	68.4887		45.4923	31.34		0.231636	0.171261		51.5893	53.5701		0.453956	0.289041

## Sheet: coincided
means (event "coin")	Avg. swimming speed (cm/s)	control	events	Freezing time (%)	control	events	Swimming time (%)	control	events	Rapid movement time (%)	control	events	Meandering (°/cm)	control	events	"Walls/Inner area" ratio	control	events
fish#1		2.48815	2.87378		10.9156	17.3649		88.4384	81.6771		0.646017	0.958022		32.2896	30.9993		0.492545	0.617933
fish#2		2.65674	2.18541		12.8406	31.5489		85.8884	68.2619		1.27103	0.189208		28.8503	23.8303		0.505684	0.436609
fish#3		3.49373	2.79461		9.80453	11.6761		87.5654	87.9344		2.63004	0.389497		43.1452	25.3122		0.593801	0.399236
fish#4		3.40922	3.87779		6.8924	6.47024		91.3905	91.56		1.71714	1.96971		20.7122	18.9088		0.570799	0.637253

## Sheet: after
means (event "after")	Avg. swimming speed (cm/s)	control	events	Freezing time (%)	control	events	Swimming time (%)	control	events	Rapid movement time (%)	control	events	Meandering (°/cm)	control	events	"Walls/Inner area" ratio	control	events
fish#1		3.44339	2.63498		12.0253	20.0868		85.9477	79.3502		2.02697	0.562959		45.4606	58.2897		0.812384	0.785511
fish#2		1.64638	1.54669		29.5277	28.0127		70.3535	71.965		0.118803	0.0222928		35.1262	31.6492		0.520983	0.405622
fish#3		2.04751	1.77781		13.3224	20.609		86.4548	79.2349		0.222791	0.156028		28.7657	23.9906		0.585464	0.483951
fish#4		1.50344	1.07071		45.5504	59.6271		54.2081	40.0599		0.241509	0.312964		51.1522	47.6732		0.494909	0.446477
fish#5		2.05034	2.05811		18.5748	28.1273		81.0908	70.0274		0.334348	1.84525		37.044	26.0911		0.526645	0.442317
fish#6		1.85714	1.99773		37.0298	40.9842		62.8159	58.5254		0.154298	0.490333		34.022	43.7222		0.336548	0.410106
fish#7		2.73751	2.21163		8.00348	22.9209		91.4529	76.2403		0.543655	0.83881		30.7671	42.6517		0.506086	0.394722
fish#8		2.84072	2.1084		8.78686	23.709		90.6542	75.9683		0.558923	0.322712		29.1346	25.7188		0.634189	0.450719
