# Supplementary material for: Influence of Geomagnetic Disturbances at Different Times of Day on Locomotor Activity in Zebrafish (Danio Rerio)
Source: Clocks Sleep. 2021 Nov 29;3(4):624–32. doi: 10.3390/clockssleep3040045 (PMC8700499; doi:10.3390/clockssleep3040045)
Supplement: Supplementary file 1 [file clockssleep-03-00045-s001.zip › Suppl(11_09-15_09).xlsx]

## Sheet: initial_data
Fish	Time	24(light-dark)	k>4	Avg. swimming speed (cm/s)	Freezing time (%)	Swimming time (%)	Rapid movement time (%)	Meandering (°/cm)	"Walls/Inner area" ratio
1	2020-09-11 00:15:00	D	contr	1.15122	64.1711	35.8289	0	29.5229	0.816447
1	2020-09-11 00:45:00	D	contr	1.51855	45.607	53.9906	0.402414	50.9622	0.572737
1	2020-09-11 01:14:59	D	contr	1.11762	63.5877	36.4123	0	31.1982	0.321107
1	2020-09-11 01:45:00	D	contr	0.900539	72.1739	27.8261	0	30.5491	0.677086
1	2020-09-11 02:15:00	D	contr	0.883523	72.9585	27.0415	0	38.7709	0.489658
1	2020-09-11 02:44:59	D	contr	1.39781	52.4579	47.4719	0.070225	32.1788	0.823829
1	2020-09-12 00:15:00	D	contr	1.57345	31.7024	68.2976	0	81.9828	1
1	2020-09-12 00:45:00	D	contr	1.57224	33.4228	66.5772	0	77.6929	1
1	2020-09-12 01:14:59	D	contr	0.078983	100	0	0	327.535	1
1	2020-09-12 01:45:00	D	contr	0.757102	75.9893	24.0107	0	61.9978	0.198605
1	2020-09-12 02:15:00	D	contr	0.055427	100	0	0	338.414	0
1	2020-09-12 02:44:59	D	contr	0.050316	100	0	0	378.836	0.62815
1	2020-09-13 00:15:00	D	contr	0.03913	100	0	0	324.225	1
1	2020-09-13 00:45:00	D	contr	1.20809	59.7862	40.2138	0	60.6201	0.833963
1	2020-09-13 01:14:59	D	contr	1.4712	30.4609	69.5391	0	72.1592	1
1	2020-09-13 01:45:00	D	contr	0.481151	86.9184	13.0816	0	53.2239	0.34318
1	2020-09-13 02:15:00	D	contr	1.14741	55.6081	44.3243	0.067568	87.4958	1
1	2020-09-13 02:44:59	D	contr	1.14639	52.349	47.651	0	68.1438	1
1	2020-09-14 00:15:00	D	before	1.21236	48.1208	51.8121	0.067114	66.432	1
1	2020-09-14 00:45:00	D	before	0.38348	90.9457	9.05433	0	89.1814	0.410131
1	2020-09-14 01:14:59	D	before	1.06043	61.745	38.1879	0.067114	82.2659	0.99908
1	2020-09-14 01:45:00	D	before	0.964723	66.8956	32.967	0.137363	39.3635	0.367467
1	2020-09-14 02:15:00	D	before	0.78981	70.1142	29.8858	0	45.5187	0.658092
1	2020-09-14 02:44:59	D	before	0.10565	99.5614	0.438596	0	137.822	0
1	2020-09-15 00:15:00	D	contr	0.18681	95.3568	4.64316	0	104.119	0.450272
1	2020-09-15 00:45:00	D	contr	0.45012	91.1869	8.81308	0	43.8302	0.030318
1	2020-09-15 01:14:59	D	contr	0.209904	96.3115	3.68852	0	48.0272	1
1	2020-09-15 01:45:00	D	contr	0.230948	96.0932	3.90679	0	66.8628	0
1	2020-09-15 02:15:00	D	contr	0.102374	98.3871	1.6129	0	351.752	0.531699
1	2020-09-15 02:44:59	D	contr	0.534325	89.7059	9.8262	0.467914	103.353	0.001935
2	2020-09-11 00:15:00	D	contr	0.599855	84.2282	15.7718	0	32.167	0.583524
2	2020-09-11 00:45:00	D	contr	0.708155	80.0558	19.9442	0	36.9631	0.314427
2	2020-09-11 01:14:59	D	contr	0.734238	76.59	23.3424	0.067659	41.7104	0.447395
2	2020-09-11 01:45:00	D	contr	1.12805	67.0683	32.5301	0.401606	49.274	0.643053
2	2020-09-11 02:15:00	D	contr	1.2292	52.262	47.3329	0.405132	44.5866	0.65411
2	2020-09-11 02:44:59	D	contr	1.49783	41.1682	58.1281	0.70373	38.1207	0.599505
2	2020-09-12 00:15:00	D	contr	0.828478	75	25	0	36.1956	0.391517
2	2020-09-12 00:45:00	D	contr	0.937968	70.4424	29.3566	0.201072	35.5624	0.127737
2	2020-09-12 01:14:59	D	contr	0.7104	80.3062	19.6938	0	28.9479	0
2	2020-09-12 01:45:00	D	contr	0.701669	80.6233	19.3767	0	35.7061	0.136802
2	2020-09-12 02:15:00	D	contr	1.01975	68.8294	30.6355	0.535117	36.0648	0.334557
2	2020-09-12 02:44:59	D	contr	0.742735	77.4497	22.5503	0	27.9823	0.273798
2	2020-09-13 00:15:00	D	contr	0.657232	81.5068	18.4932	0	52.7586	0.957242
2	2020-09-13 00:45:00	D	contr	0.469112	87.7852	12.2148	0	51.8687	0
2	2020-09-13 01:14:59	D	contr	0.108544	100	0	0	186.018	0
2	2020-09-13 01:45:00	D	contr	0.476485	87.9599	12.0401	0	61.0536	0.058813
2	2020-09-13 02:15:00	D	contr	0.886527	72.8246	27.1084	0.066934	46.4345	0.170373
2	2020-09-13 02:44:59	D	contr	0.591907	86.2772	13.7228	0	42.9415	0.246365
2	2020-09-14 00:15:00	D	before	0.267056	94.8357	5.16432	0	59.8098	0
2	2020-09-14 00:45:00	D	before	0.551252	85.4054	14.5946	0	55.1012	0.006785
2	2020-09-14 01:14:59	D	before	0.624427	83.2999	16.7001	0	47.8042	0.115039
2	2020-09-14 01:45:00	D	before	0.153656	98.1469	1.85312	0	85.9905	0
2	2020-09-14 02:15:00	D	before	0.593747	83.908	15.8046	0.287356	72.2502	0.434217
2	2020-09-14 02:44:59	D	before	0.159621	99.1084	0.891632	0	89.084	0
2	2020-09-15 00:15:00	D	contr	0.726354	76.6801	23.3199	0	44.3972	0.213218
2	2020-09-15 00:45:00	D	contr	0.310772	92.8916	7.10835	0	94.8545	0
2	2020-09-15 01:14:59	D	contr	0.219167	96.4793	3.52065	0	77.5152	0
2	2020-09-15 01:45:00	D	contr	0.191185	97.6636	2.33645	0	95.96	0.024888
2	2020-09-15 02:15:00	D	contr	0.358471	91.255	8.74499	0	59.9318	0.179721
2	2020-09-15 02:44:59	D	contr	0.14541	99.5238	0.47619	0	99.876	0
3	2020-09-11 00:15:00	D	contr	0.691465	82.3249	17.3351	0.339905	28.5543	0.198605
3	2020-09-11 00:45:00	D	contr	0.876074	72.9095	27.0214	0.069109	34.884	0.632607
3	2020-09-11 01:14:59	D	contr	0.225905	97.9771	2.02293	0	77.4064	1
3	2020-09-11 01:45:00	D	contr	0.164545	100	0	0	46.3882	0
3	2020-09-11 02:15:00	D	contr	1.60477	35.6568	64.2761	0.067024	43.0812	0.782754
3	2020-09-11 02:44:59	D	contr	1.03112	60.7914	39.1367	0.071942	36.8281	0.882417
3	2020-09-12 00:15:00	D	contr	0.071517	100	0	0	158.073	1
3	2020-09-12 00:45:00	D	contr	0.555458	83.4369	16.5631	0	35.664	0.056794
3	2020-09-12 01:14:59	D	contr	0.746949	73.3914	26.6086	0	32.9437	0.767363
3	2020-09-12 01:45:00	D	contr	0.958961	69.0141	30.5835	0.402414	26.9608	0.768169
3	2020-09-12 02:15:00	D	contr	0.135226	98.5577	1.44231	0	337.167	1
3	2020-09-12 02:44:59	D	contr	0.791839	76.2195	23.7805	0	25.2698	0.058813
3	2020-09-13 00:15:00	D	contr	0.735145	77.0261	22.9069	0.066979	32.5287	0.768976
3	2020-09-13 00:45:00	D	contr	0.655003	76.8717	22.9947	0.13369	37.6745	0.747321
3	2020-09-13 01:14:59	D	contr	0.865084	70.8699	29.1301	0	34.5481	0.549259
3	2020-09-13 01:45:00	D	contr	0.763455	76.2323	23.7002	0.067522	30.7245	0.212653
3	2020-09-13 02:15:00	D	contr	0.735833	75.2113	24.507	0.28169	98.0783	0.893658
3	2020-09-13 02:44:59	D	contr	0.881508	74.6801	25.3199	0	26.2471	0.424407
3	2020-09-14 00:15:00	D	before	0.380639	91.0738	8.85906	0.067114	45.8264	0.915479
3	2020-09-14 00:45:00	D	before	0.827024	71.957	28.043	0	25.8907	0.649052
3	2020-09-14 01:14:59	D	before	0.088846	100	0	0	66.9178	0
3	2020-09-14 01:45:00	D	before	0.600283	80.2521	19.7479	0	27.1355	0.526121
3	2020-09-14 02:15:00	D	before	0.059227	100	0	0	239.714	0.786012
3	2020-09-14 02:44:59	D	before	0.116487	100	0	0	74.7935	0.06489
3	2020-09-15 00:15:00	D	contr	0.422021	89.7608	10.1644	0.074738	39.1096	0.472076
3	2020-09-15 00:45:00	D	contr	0.421622	88.9186	11.0814	0	49.4296	0.170921
3	2020-09-15 01:14:59	D	contr	1.24939	64.0777	35.5062	0.416089	27.262	0.451371
3	2020-09-15 01:45:00	D	contr	0.754959	75.1174	24.8826	0	29.3458	0.733036
3	2020-09-15 02:15:00	D	contr	0.109199	100	0	0	102.488	1
3	2020-09-15 02:44:59	D	contr	0.690039	82.82	17.18	0	28.7891	0.196929
4	2020-09-11 00:15:00	D	contr	0.311036	92.953	7.04698	0	88.6278	1
4	2020-09-11 00:45:00	D	contr	1.55035	40.0802	59.9198	0	43.9634	0.918995
4	2020-09-11 01:14:59	D	contr	1.97669	31.9946	67.5368	0.468541	51.7312	0.986243
4	2020-09-11 01:45:00	D	contr	0.644617	81.5508	18.3824	0.066845	35.5779	0.438158
4	2020-09-11 02:15:00	D	contr	0.44759	89.6852	10.2478	0.066979	62.9723	0.086894
4	2020-09-11 02:44:59	D	contr	1.0392	71.3904	28.1417	0.467914	35.8643	0.312006
4	2020-09-12 00:15:00	D	contr	0.477486	91.337	8.66303	0	48.7189	0.074569
4	2020-09-12 00:45:00	D	contr	0.402139	89.0154	10.9846	0	75.0397	0.031307
4	2020-09-12 01:14:59	D	contr	0.422919	86.9215	13.0785	0	80.2959	0.058813
4	2020-09-12 01:45:00	D	contr	1.96632	24.9498	74.9833	0.06689	37.8063	0.872104
4	2020-09-12 02:15:00	D	contr	0.339139	95.7909	3.80177	0.407332	86.8482	0
4	2020-09-12 02:44:59	D	contr	0.336185	93.1366	6.86342	0	51.1581	0.020462
4	2020-09-13 00:15:00	D	contr	2.51114	12.9593	86.3727	0.668003	52.155	1
4	2020-09-13 00:45:00	D	contr	2.4479	17.4232	82.3097	0.267023	57.073	1
4	2020-09-13 01:14:59	D	contr	1.07264	62.7923	37.2077	0	52.2905	0.480842
4	2020-09-13 01:45:00	D	contr	0.601733	80.9717	19.0283	0	66.8403	0.031307
4	2020-09-13 02:15:00	D	contr	2.0817	23.7809	76.2191	0	70.2272	1
4	2020-09-13 02:44:59	D	contr	0.539478	88.4159	11.1654	0.418702	48.4309	0.093227
4	2020-09-14 00:15:00	D	before	0.286885	95.1936	4.80641	0	85.4643	0.938461
4	2020-09-14 00:45:00	D	before	0.228938	99.0654	0.734312	0.200267	107.198	0.567014
4	2020-09-14 01:14:59	D	before	0.372939	96.234	3.49697	0.268998	70.1746	0.439474
4	2020-09-14 01:45:00	D	before	1.42093	54.1082	45.491	0.400802	34.876	0.769784
4	2020-09-14 02:15:00	D	before	1.56954	28.6288	71.3712	0	55.4876	1
4	2020-09-14 02:44:59	D	before	0.239434	96.7413	3.25866	0	85.9559	0
4	2020-09-15 00:15:00	D	contr	0.210644	98.3108	1.68919	0	130.989	0
4	2020-09-15 00:45:00	D	contr	0.505814	84.0483	15.8847	0.067024	42.4447	0.069466
4	2020-09-15 01:14:59	D	contr	0.290492	94.8287	5.03694	0.134318	145.302	0.001451
4	2020-09-15 01:45:00	D	contr	0.507118	85.1478	14.8522	0	69.5208	0.05377
4	2020-09-15 02:15:00	D	contr	0.121573	100	0	0	181.657	0
4	2020-09-15 02:44:59	D	contr	0.56539	84.1929	15.8071	0	45.9011	0.087926

## Sheet: averaged_contr
Fish	Time	24(light-dark)	k>4	Avg. swimming speed (cm/s)					contr	event 14.09		Freezing time (%)					contr	event 14.09		Swimming time (%)					contr	event 14.09		Rapid movement time (%)					contr	event 14.09		Meandering (°/cm)					contr	event 14.09		"Walls/Inner area" ratio					contr
1	2020-09-11 00:15:00	D	contr	1.15122	1.57345	0.03913	0.18681		0.737651	1.21236		64.1711	31.7024	100	95.3568		72.8076	48.1208		35.8289	68.2976	0	4.64316		27.1924	51.8121		0	0	0	0		0	0.067114		29.5229	81.9828	324.225	104.119		134.963	66.432		0.816447	1	1	0.450272		0.81668
1	2020-09-11 00:45:00	D	contr	1.51855	1.57224	1.20809	0.45012		1.18725	0.38348		45.607	33.4228	59.7862	91.1869		57.5007	90.9457		53.9906	66.5772	40.2138	8.81308		42.3987	9.05433		0.402414	0	0	0		0.100603	0		50.9622	77.6929	60.6201	43.8302		58.2763	89.1814		0.572737	1	0.833963	0.030318		0.609254
1	2020-09-11 01:14:59	D	contr	1.11762	0.078983	1.4712	0.209904		0.719427	1.06043		63.5877	100	30.4609	96.3115		72.59	61.745		36.4123	0	69.5391	3.68852		27.41	38.1879		0	0	0	0		0	0.067114		31.1982	327.535	72.1592	48.0272		119.73	82.2659		0.321107	1	1	1		0.830277
1	2020-09-11 01:45:00	D	contr	0.900539	0.757102	0.481151	0.230948		0.592435	0.964723		72.1739	75.9893	86.9184	96.0932		82.7937	66.8956		27.8261	24.0107	13.0816	3.90679		17.2063	32.967		0	0	0	0		0	0.137363		30.5491	61.9978	53.2239	66.8628		53.1584	39.3635		0.677086	0.198605	0.34318	0		0.304718
1	2020-09-11 02:15:00	D	contr	0.883523	0.055427	1.14741	0.102374		0.547184	0.78981		72.9585	100	55.6081	98.3871		81.7384	70.1142		27.0415	0	44.3243	1.6129		18.2447	29.8858		0	0	0.067568	0		0.016892	0		38.7709	338.414	87.4958	351.752		204.108	45.5187		0.489658	0	1	0.531699		0.505339
1	2020-09-11 02:44:59	D	contr	1.39781	0.050316	1.14639	0.534325		0.78221	0.10565		52.4579	100	52.349	89.7059		73.6282	99.5614		47.4719	0	47.651	9.8262		26.2373	0.438596		0.070225	0	0	0.467914		0.134535	0		32.1788	378.836	68.1438	103.353		145.628	137.822		0.823829	0.62815	1	0.001935		0.613479
2	2020-09-12 00:15:00	D	contr	0.599855	0.828478	0.657232	0.726354		0.70298	0.267056		84.2282	75	81.5068	76.6801		79.3538	94.8357		15.7718	25	18.4932	23.3199		20.6462	5.16432		0	0	0	0		0	0		32.167	36.1956	52.7586	44.3972		41.3796	59.8098		0.583524	0.391517	0.957242	0.213218		0.536375
2	2020-09-12 00:45:00	D	contr	0.708155	0.937968	0.469112	0.310772		0.606502	0.551252		80.0558	70.4424	87.7852	92.8916		82.7938	85.4054		19.9442	29.3566	12.2148	7.10835		17.156	14.5946		0	0.201072	0	0		0.050268	0		36.9631	35.5624	51.8687	94.8545		54.8122	55.1012		0.314427	0.127737	0	0		0.110541
2	2020-09-12 01:14:59	D	contr	0.734238	0.7104	0.108544	0.219167		0.443087	0.624427		76.59	80.3062	100	96.4793		88.3439	83.2999		23.3424	19.6938	0	3.52065		11.6392	16.7001		0.067659	0	0	0		0.0169147	0		41.7104	28.9479	186.018	77.5152		83.5478	47.8042		0.447395	0	0	0		0.111849
2	2020-09-12 01:45:00	D	contr	1.12805	0.701669	0.476485	0.191185		0.624347	0.153656		67.0683	80.6233	87.9599	97.6636		83.3287	98.1469		32.5301	19.3767	12.0401	2.33645		16.5708	1.85312		0.401606	0	0	0		0.100402	0		49.274	35.7061	61.0536	95.96		60.4984	85.9905		0.643053	0.136802	0.058813	0.024888		0.215889
2	2020-09-12 02:15:00	D	contr	1.2292	1.01975	0.886527	0.358471		0.873487	0.593747		52.262	68.8294	72.8246	91.255		71.2928	83.908		47.3329	30.6355	27.1084	8.74499		28.4554	15.8046		0.405132	0.535117	0.066934	0		0.251796	0.287356		44.5866	36.0648	46.4345	59.9318		46.7544	72.2502		0.65411	0.334557	0.170373	0.179721		0.33469
2	2020-09-12 02:44:59	D	contr	1.49783	0.742735	0.591907	0.14541		0.744471	0.159621		41.1682	77.4497	86.2772	99.5238		76.1047	99.1084		58.1281	22.5503	13.7228	0.47619		23.7194	0.891632		0.70373	0	0	0		0.175932	0		38.1207	27.9823	42.9415	99.876		52.2301	89.084		0.599505	0.273798	0.246365	0		0.279917
3	2020-09-13 00:15:00	D	contr	0.691465	0.071517	0.735145	0.422021		0.480037	0.380639		82.3249	100	77.0261	89.7608		87.278	91.0738		17.3351	0	22.9069	10.1644		12.6016	8.85906		0.339905	0	0.066979	0.074738		0.120405	0.067114		28.5543	158.073	32.5287	39.1096		64.5665	45.8264		0.198605	1	0.768976	0.472076		0.609914
3	2020-09-13 00:45:00	D	contr	0.876074	0.555458	0.655003	0.421622		0.627039	0.827024		72.9095	83.4369	76.8717	88.9186		80.5341	71.957		27.0214	16.5631	22.9947	11.0814		19.4152	28.043		0.069109	0	0.13369	0		0.0506998	0		34.884	35.664	37.6745	49.4296		39.413	25.8907		0.632607	0.056794	0.747321	0.170921		0.401911
3	2020-09-13 01:14:59	D	contr	0.225905	0.746949	0.865084	1.24939		0.771832	0.088846		97.9771	73.3914	70.8699	64.0777		76.579	100		2.02293	26.6086	29.1301	35.5062		23.317	0		0	0	0	0.416089		0.104022	0		77.4064	32.9437	34.5481	27.262		43.04	66.9178		1	0.767363	0.549259	0.451371		0.691998
3	2020-09-13 01:45:00	D	contr	0.164545	0.958961	0.763455	0.754959		0.66048	0.600283		100	69.0141	76.2323	75.1174		80.0909	80.2521		0	30.5835	23.7002	24.8826		19.7916	19.7479		0	0.402414	0.067522	0		0.117484	0		46.3882	26.9608	30.7245	29.3458		33.3548	27.1355		0	0.768169	0.212653	0.733036		0.428465
3	2020-09-13 02:15:00	D	contr	1.60477	0.135226	0.735833	0.109199		0.646258	0.059227		35.6568	98.5577	75.2113	100		77.3564	100		64.2761	1.44231	24.507	0		22.5564	0		0.067024	0	0.28169	0		0.0871785	0		43.0812	337.167	98.0783	102.488		145.204	239.714		0.782754	1	0.893658	1		0.919103
3	2020-09-13 02:44:59	D	contr	1.03112	0.791839	0.881508	0.690039		0.848627	0.116487		60.7914	76.2195	74.6801	82.82		73.6277	100		39.1367	23.7805	25.3199	17.18		26.3543	0		0.071942	0	0	0		0.0179855	0		36.8281	25.2698	26.2471	28.7891		29.2836	74.7935		0.882417	0.058813	0.424407	0.196929		0.390641
4	2020-09-14 00:15:00	D	before	0.311036	0.477486	2.51114	0.210644		0.877576	0.286885		92.953	91.337	12.9593	98.3108		73.89	95.1936		7.04698	8.66303	86.3727	1.68919		25.943	4.80641		0	0	0.668003	0		0.167001	0		88.6278	48.7189	52.155	130.989		80.1228	85.4643		1	0.074569	1	0		0.518642
4	2020-09-14 00:45:00	D	before	1.55035	0.402139	2.4479	0.505814		1.22655	0.228938		40.0802	89.0154	17.4232	84.0483		57.6418	99.0654		59.9198	10.9846	82.3097	15.8847		42.2747	0.734312		0	0	0.267023	0.067024		0.0835117	0.200267		43.9634	75.0397	57.073	42.4447		54.6302	107.198		0.918995	0.031307	1	0.069466		0.504942
4	2020-09-14 01:14:59	D	before	1.97669	0.422919	1.07264	0.290492		0.940685	0.372939		31.9946	86.9215	62.7923	94.8287		69.1343	96.234		67.5368	13.0785	37.2077	5.03694		30.715	3.49697		0.468541	0	0	0.134318		0.150715	0.268998		51.7312	80.2959	52.2905	145.302		82.4048	70.1746		0.986243	0.058813	0.480842	0.001451		0.381837
4	2020-09-14 01:45:00	D	before	0.644617	1.96632	0.601733	0.507118		0.929948	1.42093		81.5508	24.9498	80.9717	85.1478		68.155	54.1082		18.3824	74.9833	19.0283	14.8522		31.8115	45.491		0.066845	0.06689	0	0		0.0334337	0.400802		35.5779	37.8063	66.8403	69.5208		52.4363	34.876		0.438158	0.872104	0.031307	0.05377		0.348835
4	2020-09-14 02:15:00	D	before	0.44759	0.339139	2.0817	0.121573		0.7475	1.56954		89.6852	95.7909	23.7809	100		77.3142	28.6288		10.2478	3.80177	76.2191	0		22.5672	71.3712		0.066979	0.407332	0	0		0.118578	0		62.9723	86.8482	70.2272	181.657		100.426	55.4876		0.086894	0	1	0		0.271724
4	2020-09-14 02:44:59	D	before	1.0392	0.336185	0.539478	0.56539		0.620063	0.239434		71.3904	93.1366	88.4159	84.1929		84.2839	96.7413		28.1417	6.86342	11.1654	15.8071		15.4944	3.25866		0.467914	0	0.418702	0		0.221654	0		35.8643	51.1581	48.4309	45.9011		45.3386	85.9559		0.312006	0.020462	0.093227	0.087926		0.128405
[truncated: 1 more columns]

## Sheet: t-test depended_sampl_data
Fish	Avg. swimming speed (cm/s)	contr	event 14.09	Freezing time (%)	contr	event 14.09	Swimming time (%)	contr	event 14.09	Rapid movement time (%)	contr	event 14.09	Meandering (°/cm)	contr	event 14.09	"Walls/Inner area" ratio	contr	event 14.09
1		0.737651	1.21236		72.8076	48.1208		27.1924	51.8121		0	0.067114		134.963	66.432		0.81668	1
1		1.18725	0.38348		57.5007	90.9457		42.3987	9.05433		0.100603	0		58.2763	89.1814		0.609254	0.410131
1		0.719427	1.06043		72.59	61.745		27.41	38.1879		0	0.067114		119.73	82.2659		0.830277	0.99908
1		0.592435	0.964723		82.7937	66.8956		17.2063	32.967		0	0.137363		53.1584	39.3635		0.304718	0.367467
1		0.547184	0.78981		81.7384	70.1142		18.2447	29.8858		0.016892	0		204.108	45.5187		0.505339	0.658092
1		0.78221	0.10565		73.6282	99.5614		26.2373	0.438596		0.134535	0		145.628	137.822		0.613479	0
2		0.70298	0.267056		79.3538	94.8357		20.6462	5.16432		0	0		41.3796	59.8098		0.536375	0
2		0.606502	0.551252		82.7938	85.4054		17.156	14.5946		0.050268	0		54.8122	55.1012		0.110541	0.006785
2		0.443087	0.624427		88.3439	83.2999		11.6392	16.7001		0.0169147	0		83.5478	47.8042		0.111849	0.115039
2		0.624347	0.153656		83.3287	98.1469		16.5708	1.85312		0.100402	0		60.4984	85.9905		0.215889	0
2		0.873487	0.593747		71.2928	83.908		28.4554	15.8046		0.251796	0.287356		46.7544	72.2502		0.33469	0.434217
2		0.744471	0.159621		76.1047	99.1084		23.7194	0.891632		0.175932	0		52.2301	89.084		0.279917	0
3		0.480037	0.380639		87.278	91.0738		12.6016	8.85906		0.120405	0.067114		64.5665	45.8264		0.609914	0.915479
3		0.627039	0.827024		80.5341	71.957		19.4152	28.043		0.0506998	0		39.413	25.8907		0.401911	0.649052
3		0.771832	0.088846		76.579	100		23.317	0		0.104022	0		43.04	66.9178		0.691998	0
3		0.66048	0.600283		80.0909	80.2521		19.7916	19.7479		0.117484	0		33.3548	27.1355		0.428465	0.526121
3		0.646258	0.059227		77.3564	100		22.5564	0		0.0871785	0		145.204	239.714		0.919103	0.786012
3		0.848627	0.116487		73.6277	100		26.3543	0		0.0179855	0		29.2836	74.7935		0.390641	0.06489
4		0.877576	0.286885		73.89	95.1936		25.943	4.80641		0.167001	0		80.1228	85.4643		0.518642	0.938461
4		1.22655	0.228938		57.6418	99.0654		42.2747	0.734312		0.0835117	0.200267		54.6302	107.198		0.504942	0.567014
4		0.940685	0.372939		69.1343	96.234		30.715	3.49697		0.150715	0.268998		82.4048	70.1746		0.381837	0.439474
4		0.929948	1.42093		68.155	54.1082		31.8115	45.491		0.0334337	0.400802		52.4363	34.876		0.348835	0.769784
4		0.7475	1.56954		77.3142	28.6288		22.5672	71.3712		0.118578	0		100.426	55.4876		0.271724	1
4		0.620063	0.239434		84.2839	96.7413		15.4944	3.25866		0.221654	0		45.3386	85.9559		0.128405	0
means (event "before")
fish#1		0.761026	0.752743		73.5098	72.8971		26.4482	27.0576		0.042005	0.0452652		119.31	76.7639		0.613291	0.572462
fish#2		0.665812	0.391627		80.2029	90.7841		19.6978	9.16806		0.0992187	0.0478927		56.5371	68.34		0.264877	0.0926735
fish#3		0.672379	0.345418		79.2444	90.5471		20.6727	9.44167		0.0829626	0.0111857		59.1436	80.0463		0.573672	0.490259
fish#4		0.890387	0.686445		71.7365	78.3286		28.1343	21.5264		0.129149	0.145011		69.2265	73.1928		0.359064	0.619122
