# Supplementary material for: Influence of Geomagnetic Disturbances at Different Times of Day on Locomotor Activity in Zebrafish (Danio Rerio)
Source: Clocks Sleep. 2021 Nov 29;3(4):624–32. doi: 10.3390/clockssleep3040045 (PMC8700499; doi:10.3390/clockssleep3040045)
Supplement: Supplementary file 1 [file clockssleep-03-00045-s001.zip › Suppl(29_08-02_09).xlsx]

## Sheet: initial_data
Fish	Time	24(light-dark)	k>4	Avg. swimming speed (cm/s)	Freezing time (%)	Swimming time (%)	Rapid movement time (%)	Meandering (°/cm)	"Walls/Inner area" ratio
1	2020-08-29 00:15:00	D	contr_bf	4.22391	7.17639	87.9946	4.82897	42.019	0.940161
1	2020-08-29 00:45:00	D	contr_bf	4.21468	13.6735	82.2449	4.08163	62.2985	1
1	2020-08-29 01:14:59	D	contr_bf	3.43831	9.35397	89.6366	1.00942	40.7778	0.857406
1	2020-08-29 01:45:00	D	contr_bf	2.26187	10.5802	89.0785	0.341297	32.8352	0.297557
1	2020-08-29 02:15:00	D	contr_bf	1.53178	36.8527	63.1473	0	32.2872	0.236089
1	2020-08-29 02:44:59	D	contr_bf	2.30767	23.3785	76.3364	0.285103	50.3442	1
1	2020-08-29 09:15:00	L	conrt_coin	2.44368	4.20561	94.9933	0.801068	25.3327	0.229739
1	2020-08-29 09:45:00	L	conrt_coin	1.14765	52.4733	47.5267	0	32.159	0.155568
1	2020-08-29 10:14:59	L	conrt_coin	3.60431	4.07482	94.656	1.2692	47.5371	0.90527
1	2020-08-29 10:45:00	L	conrt_coin	1.98807	14.4482	85.2843	0.267559	29.3049	0.399385
1	2020-08-29 11:15:00	L	conrt_coin	1.63471	9.95989	90.0401	0	28.607	0.429175
1	2020-08-29 11:44:59	L	conrt_coin	2.13382	6.88043	92.9192	0.200401	39.2388	0.700901
1	2020-08-29 15:15:00	L	contr_aft	1.63132	17.4232	82.5768	0	27.7311	0.510374
1	2020-08-29 15:45:00	L	contr_aft	1.38103	48.3612	50.5686	1.07023	29.7117	0.213802
1	2020-08-29 16:14:59	L	contr_aft	1.93293	8.87851	90.7877	0.333778	33.5693	0.524902
1	2020-08-29 16:45:00	L	contr_aft	1.6408	10.8216	89.1784	0	27.014	0.437699
1	2020-08-29 17:15:00	L	contr_aft	1.78298	15.5288	84.4712	0	25.1491	0.530472
1	2020-08-29 17:44:59	L	contr_aft	2.16703	2.80374	97.1295	0.066756	32.9829	0.497343
1	2020-08-29 18:15:00	L	contr_aft	1.89683	5.70087	94.0979	0.201207	28.6781	0.556487
1	2020-08-29 18:45:00	L	contr_aft	1.87651	20.2405	79.6927	0.0668	33.3525	0.622307
1	2020-08-29 19:14:59	L	contr_aft	2.58429	9.35204	89.4456	1.2024	37.6581	0.582928
1	2020-08-29 19:45:00	L	contr_aft	1.3393	34.6309	65.3691	0	35.7812	0.456885
1	2020-08-29 20:15:00	L	contr_aft	1.83299	9.61282	90.3872	0	35.973	0.431793
1	2020-08-29 20:44:59	L	contr_aft	1.40018	35.5853	64.2809	0.133779	37.4774	0.348299
1	2020-08-30 00:15:00	D	contr_bf	0.180509	98.6622	1.33779	0	178.239	0
1	2020-08-30 00:45:00	D	contr_bf	0.542555	88.3534	10.9103	0.736278	76.0851	0.037386
1	2020-08-30 01:14:59	D	contr_bf	1.0566	66.2433	33.4893	0.26738	47.223	0.144742
1	2020-08-30 01:45:00	D	contr_bf	0.33956	93.5204	6.47963	0	110.182	0
1	2020-08-30 02:15:00	D	contr_bf	0.504048	89.8179	9.57518	0.606878	69.6388	0.029428
1	2020-08-30 02:44:59	D	contr_bf	1.02766	61.8614	37.9986	0.139958	44.6301	0.244119
1	2020-08-30 09:15:00	L	conrt_coin	2.04725	5.54442	94.3888	0.0668	27.6649	0.465563
1	2020-08-30 09:45:00	L	conrt_coin	1.78346	15.4977	84.0347	0.467602	27.7493	0.295293
1	2020-08-30 10:14:59	L	conrt_coin	2.05254	14.7157	84.0803	1.20401	27.0807	0.405168
1	2020-08-30 10:45:00	L	conrt_coin	1.3346	30.7281	69.2719	0	28.7731	0.159377
1	2020-08-30 11:15:00	L	conrt_coin	3.49214	2.4032	96.5955	1.00134	34.2757	0.753555
1	2020-08-30 11:44:59	L	conrt_coin	2.0396	14.5053	84.893	0.601604	39.0963	0.503502
1	2020-08-30 15:15:00	L	contr_aft	1.56858	20.2007	79.7993	0	27.3003	0.593772
1	2020-08-30 15:45:00	L	contr_aft	3.11109	5.21042	94.5892	0.200401	55.0256	1
1	2020-08-30 16:14:59	L	contr_aft	1.47359	21.7101	78.2899	0	30.4748	0.466233
1	2020-08-30 16:45:00	L	contr_aft	3.58602	2.40803	96.7893	0.802676	36.1508	0.830268
1	2020-08-30 17:15:00	L	contr_aft	3.28641	6.34603	92.7188	0.935204	50.1703	1
1	2020-08-30 17:44:59	L	contr_aft	2.85441	11.4381	87.7592	0.802676	50.7776	0.960075
1	2020-08-30 18:15:00	L	contr_aft	2.10089	13.6364	85.762	0.601604	26.9953	0.524208
1	2020-08-30 18:45:00	L	contr_aft	1.74043	10.8434	89.0228	0.133869	27.9183	0.467572
1	2020-08-30 19:14:59	L	contr_aft	1.44894	29.7063	70.2937	0	26.352	0.410974
1	2020-08-30 19:45:00	L	contr_aft	1.32758	57.9545	40.9759	1.06952	23.8388	0.187441
1	2020-08-30 20:15:00	L	contr_aft	1.06023	52.9766	47.0234	0	30.1722	0.176921
1	2020-08-30 20:44:59	L	contr_aft	0.484149	88.3456	11.6544	0	47.8596	0.085619
1	2020-08-31 00:15:00	D	before	0.176059	98.9011	1.0989	0	157.611	0
1	2020-08-31 00:45:00	D	before	0.275859	95.7718	4.22819	0	113.991	0
1	2020-08-31 01:14:59	D	before	0.224979	96.8478	3.15225	0	109.151	0
1	2020-08-31 01:45:00	D	before	0.393042	91.5888	8.21095	0.200267	71.8897	0.339025
1	2020-08-31 02:15:00	D	before	0.236754	98.0014	1.99862	0	107.299	0
1	2020-08-31 02:44:59	D	before	0.770559	80.6818	18.7834	0.534759	51.6183	0.120684
1	2020-08-31 09:15:00	L	coin	4.05939	0	98.7316	1.26836	26.8494	0.778479
1	2020-08-31 09:45:00	L	coin	4.56104	0.535117	97.7258	1.73913	34.358	0.98447
1	2020-08-31 10:14:59	L	coin	2.93771	4.87316	94.259	0.867824	20.9194	0.458217
1	2020-08-31 10:45:00	L	coin	2.23194	17.4699	81.3253	1.20482	19.6636	0.408391
1	2020-08-31 11:15:00	L	coin	0.690709	77.036	22.964	0	59.2494	0.516584
1	2020-08-31 11:44:59	L	coin	2.76191	4.27522	95.0568	0.668003	24.9558	0.561456
1	2020-08-31 15:15:00	L	after	2.95755	3.87183	95.6609	0.46729	47.5048	0.928049
1	2020-08-31 15:45:00	L	after	1.4974	18.3946	81.6054	0	24.3793	0.514512
1	2020-08-31 16:14:59	L	after	2.44234	71.3014	20.7534	7.9452	19.2562	0.027446
1	2020-08-31 16:45:00	L	after	1.78205	59.012	37.5834	3.40454	24.4047	0.66568
1	2020-08-31 17:15:00	L	after	1.50161	26.8097	73.1233	0.067024	30.1221	0.371422
1	2020-08-31 17:44:59	L	after	2.23514	9.21938	88.9637	1.81696	25.3814	0.51866
1	2020-08-31 18:15:00	L	after	1.21101	42.0455	57.9545	0	24.5632	0.282776
1	2020-08-31 18:45:00	L	after	2.26507	7.29585	92.7041	0	22.3727	0.312148
1	2020-08-31 19:14:59	L	after	1.85077	22.6453	77.2879	0.0668	24.487	0.397462
1	2020-08-31 19:45:00	L	after	2.07007	14.4674	85.5326	0	29.2813	0.60468
1	2020-08-31 20:15:00	L	after	2.21684	13.061	86.2023	0.736772	20.4631	0.489168
1	2020-08-31 20:44:59	L	after	2.66753	49.4043	42.9573	7.6384	20.8777	0.195801
1	2020-09-01 00:15:00	D	contr_bf	5.21587	7.8052	87.1915	5.00334	36.0478	0.982664
1	2020-09-01 00:45:00	D	contr_bf	3.749	13.9456	81.9048	4.14966	56.4231	0.854658
1	2020-09-01 01:14:59	D	contr_bf	3.43483	21.3904	74.5989	4.0107	52.5633	0.914816
1	2020-09-01 01:45:00	D	contr_bf	3.39318	10.5874	86.8852	2.52732	61.4681	1
1	2020-09-01 02:15:00	D	contr_bf	2.96473	8.78016	89.7453	1.47453	70.994	0.92231
1	2020-09-01 02:44:59	D	contr_bf	0.574208	89.5722	10.361	0.066845	72.8789	0.852942
1	2020-09-01 09:15:00	L	conrt_coin	4.42239	1.60535	95.5853	2.80937	50.6409	0.846193
1	2020-09-01 09:45:00	L	conrt_coin	3.37492	1.2016	98.3979	0.400534	21.828	0.555778
1	2020-09-01 10:14:59	L	conrt_coin	2.39514	6.4753	93.3244	0.200267	27.3803	0.440332
1	2020-09-01 10:45:00	L	conrt_coin	3.93087	4.87642	93.5204	1.60321	46.7849	0.913997
1	2020-09-01 11:15:00	L	conrt_coin	2.54839	0.668896	99.2642	0.06689	25.1881	0.404525
1	2020-09-01 11:44:59	L	conrt_coin	2.41307	6.21658	93.115	0.668449	22.5705	0.302493
1	2020-09-01 15:15:00	L	contr_aft	2.65577	3.81271	95.3846	0.802676	25.6053	0.520045
1	2020-09-01 15:45:00	L	contr_aft	3.20799	5.88235	93.4492	0.668449	50.9151	0.943991
1	2020-09-01 16:14:59	L	contr_aft	3.47503	5.34402	93.654	1.002	73.644	1
1	2020-09-01 16:45:00	L	contr_aft	1.53837	16.0989	83.9011	0	31.9571	0.258642
1	2020-09-01 17:15:00	L	contr_aft	3.347	4.80962	94.99	0.200401	36.7536	0.414208
1	2020-09-01 17:44:59	L	contr_aft	1.32854	26.3193	73.6807	0	26.1514	0.257475
1	2020-09-01 18:15:00	L	contr_aft	1.9794	9.36455	90.6355	0	43.2083	0.643851
1	2020-09-01 18:45:00	L	contr_aft	3.60191	3.48525	94.9732	1.54156	71.0439	0.725846
1	2020-09-01 19:14:59	L	contr_aft	2.1976	3.20427	96.7957	0	30.656	0.407746
1	2020-09-01 19:45:00	L	contr_aft	1.8926	8.14419	91.8558	0	32.697	0.340875
1	2020-09-01 20:15:00	L	contr_aft	1.59122	15.2406	84.6925	0.066845	34.1554	0.436385
1	2020-09-01 20:44:59	L	contr_aft	1.48822	27.2727	72.5936	0.13369	58.6836	0.593772
2	2020-08-29 00:15:00	D	contr_bf	2.79127	8.71898	91.0127	0.268276	51.3843	0.949764
2	2020-08-29 00:45:00	D	contr_bf	3.19909	8.70147	90.3614	0.937082	68.9293	1
2	2020-08-29 01:14:59	D	contr_bf	3.53625	4.62467	94.437	0.938338	61.2393	1
2	2020-08-29 01:45:00	D	contr_bf	3.04047	8.54473	90.988	0.46729	49.5393	0.99908
2	2020-08-29 02:15:00	D	contr_bf	0.715161	77.8075	22.1925	0	52.3689	0.052293
2	2020-08-29 02:44:59	D	contr_bf	0.384605	92.3025	7.69746	0	85.1187	0.037284
2	2020-08-29 09:15:00	L	conrt_coin	2.7067	16.9786	81.6845	1.3369	24.9502	0.340856
2	2020-08-29 09:45:00	L	conrt_coin	2.5228	14.4578	85.2744	0.267738	24.1942	0.407062
2	2020-08-29 10:14:59	L	conrt_coin	2.302	13.1597	86.8403	0	30.7873	0.358228
2	2020-08-29 10:45:00	L	conrt_coin	2.4241	20.4885	79.4437	0.067843	23.1615	0.457514
2	2020-08-29 11:15:00	L	conrt_coin	1.66358	7.08556	92.5134	0.40107	31.6053	0.691037
2	2020-08-29 11:44:59	L	conrt_coin	2.3169	3.13752	91.255	5.60748	23.935	0.485067
2	2020-08-29 15:15:00	L	contr_aft	3.27805	15.1576	83.2327	1.60966	35.1086	0.623119
2	2020-08-29 15:45:00	L	contr_aft	1.74635	46.7246	52.4733	0.802139	32.4385	0.192568
2	2020-08-29 16:14:59	L	contr_aft	2.7008	18.1145	81.6835	0.20202	39.321	0.716655
2	2020-08-29 16:45:00	L	contr_aft	1.6129	37.5418	62.4582	0	42.0533	0.377699
2	2020-08-29 17:15:00	L	contr_aft	0.789079	76.387	23.5453	0.067659	56.8558	0.105654
2	2020-08-29 17:44:59	L	contr_aft	1.26817	52.6738	47.3262	0	44.7404	0.202629
2	2020-08-29 18:15:00	L	contr_aft	0.946482	68.8129	31.1871	0	44.3686	0.160086
2	2020-08-29 18:45:00	L	contr_aft	1.38921	50.8678	48.3979	0.734312	41.6883	0.085913
2	2020-08-29 19:14:59	L	contr_aft	2.331	28.2565	71.7435	0	24.6867	0.328571
2	2020-08-29 19:45:00	L	contr_aft	3.76179	6.34179	93.3244	0.333778	36.8423	0.857676
2	2020-08-29 20:15:00	L	contr_aft	1.12662	62.4582	37.5418	0	48.2025	0.200387
2	2020-08-29 20:44:59	L	contr_aft	1.65131	42.1228	57.8104	0.066756	28.0944	0.298295
2	2020-08-30 00:15:00	D	contr_bf	0.482967	88.5675	11.2948	0.137741	60.8555	0.027371
2	2020-08-30 00:45:00	D	contr_bf	0.587286	83.8019	15.5288	0.669344	46.6297	0.030874
2	2020-08-30 01:14:59	D	contr_bf	0.219397	95.6989	4.30107	0	110.112	0
2	2020-08-30 01:45:00	D	contr_bf	0.302684	93.7371	5.98761	0.275292	79.16	0.033806
2	2020-08-30 02:15:00	D	contr_bf	0.897311	75.4875	24.0251	0.487465	41.2827	0.182026
2	2020-08-30 02:44:59	D	contr_bf	0.818509	83.4455	15.5451	1.00942	48.202	0.081793
2	2020-08-30 09:15:00	L	conrt_coin	2.56392	9.93243	86.8243	3.24324	19.1119	0.438318
2	2020-08-30 09:45:00	L	conrt_coin	2.00193	14.2241	84.842	0.933908	26.019	0.505551
2	2020-08-30 10:14:59	L	conrt_coin	2.49587	33.9572	65.9759	0.066845	36.8659	0.47493
2	2020-08-30 10:45:00	L	conrt_coin	2.35541	15.3846	84.214	0.401338	22.2845	0.270983
2	2020-08-30 11:15:00	L	conrt_coin	2.86436	17.6903	82.3097	0	22.833	0.380863
2	2020-08-30 11:44:59	L	conrt_coin	2.37542	8.61148	90.3872	1.00134	21.1556	0.492542
2	2020-08-30 15:15:00	L	contr_aft	1.40947	42.5703	57.4297	0	30.1783	0.289333
2	2020-08-30 15:45:00	L	contr_aft	1.86557	13.6455	86.3545	0	22.135	0.416761
2	2020-08-30 16:14:59	L	contr_aft	0.816908	69.6177	30.3823	0	43.4517	0.154654
2	2020-08-30 16:45:00	L	contr_aft	1.41907	48.1431	51.8569	0	22.7064	0.282202
2	2020-08-30 17:15:00	L	contr_aft	3.49052	14.1522	85.7143	0.133511	45.8102	0.825693
2	2020-08-30 17:44:59	L	contr_aft	0.649025	73.6842	26.3158	0	39.8391	0.196472
2	2020-08-30 18:15:00	L	contr_aft	3.41631	7.61523	92.1176	0.267201	42.3433	0.807443
2	2020-08-30 18:45:00	L	contr_aft	1.47621	47.3614	52.5718	0.0668	29.8177	0.243597
2	2020-08-30 19:14:59	L	contr_aft	1.7931	34.6462	65.3538	0	24.1935	0.367618
2	2020-08-30 19:45:00	L	contr_aft	0.828291	75.5689	24.4311	0	33.7718	0.201508
2	2020-08-30 20:15:00	L	contr_aft	1.48732	34.8525	65.1475	0	27.8186	0.228667
2	2020-08-30 20:44:59	L	contr_aft	1.08122	61.6622	38.2708	0.067024	30.1874	0.16063
2	2020-08-31 00:15:00	D	before	0.597846	84.5775	15.0704	0.352113	51.2762	0.092635
2	2020-08-31 00:45:00	D	before	1.30847	52.8898	46.8414	0.268817	28.7174	0.649951
2	2020-08-31 01:14:59	D	before	0.487676	89.7017	10.0142	0.284091	37.2609	0.052293
2	2020-08-31 01:45:00	D	before	0.288189	94.8735	5.12645	0	143.003	0
2	2020-08-31 02:15:00	D	before	0.496526	88.2641	11.7359	0	42.5571	0.052293
2	2020-08-31 02:44:59	D	before	0.930512	77.5387	21.6543	0.806994	44.4165	0.25054
2	2020-08-31 09:15:00	L	coin	2.06566	26.4352	73.498	0.066756	20.541	0.44425
2	2020-08-31 09:45:00	L	coin	2.84649	5.48495	94.3144	0.200669	17.0474	0.548713
2	2020-08-31 10:14:59	L	coin	2.39761	18.9586	81.0414	0	23.638	0.48914
2	2020-08-31 10:45:00	L	coin	1.94056	25.2005	74.7995	0	28.6386	0.399988
2	2020-08-31 11:15:00	L	coin	2.2971	66.0881	33.0441	0.867824	31.0131	0.498002
2	2020-08-31 11:44:59	L	coin	1.56501	47.1257	52.8743	0	22.1037	0.239562
2	2020-08-31 15:15:00	L	after	0.77073	72.2296	27.7704	0	40.0667	0.127809
2	2020-08-31 15:45:00	L	after	3.69426	13.1597	86.1723	0.668003	41.7986	0.791018
2	2020-08-31 16:14:59	L	after	0.94561	66.1323	33.8677	0	43.8264	0.13367
2	2020-08-31 16:45:00	L	after	0.06874	100	0	0	172.382	0
2	2020-08-31 17:15:00	L	after	1.45204	44.4595	55.5405	0	30.1278	0.50829
2	2020-08-31 17:44:59	L	after	1.41284	52.7815	46.8792	0.339213	25.335	0.146546
2	2020-08-31 18:15:00	L	after	1.53776	44.8529	55.0802	0.066845	24.6497	0.294704
2	2020-08-31 18:45:00	L	after	1.35841	38.3534	61.6466	0	28.0418	0.407707
2	2020-08-31 19:14:59	L	after	3.93848	5.61122	93.0528	1.33601	33.1054	0.74585
2	2020-08-31 19:45:00	L	after	2.55092	14.9733	84.1578	0.868984	23.0365	0.482016
2	2020-08-31 20:15:00	L	after	4.51627	3.40454	94.7263	1.86916	36.051	0.932285
2	2020-08-31 20:44:59	L	after	1.72671	35.8528	63.4114	0.735786	26.2447	0.351379
2	2020-09-01 00:15:00	D	contr_bf	0.191805	99.2832	0.716846	0	125.688	0
2	2020-09-01 00:45:00	D	contr_bf	0.220433	97.5267	2.47326	0	290.934	0
2	2020-09-01 01:14:59	D	contr_bf	0.469162	89.4666	10.5334	0	55.8134	0.070576
2	2020-09-01 01:45:00	D	contr_bf	0.722209	76.9591	23.0409	0	48.7253	0.075125
2	2020-09-01 02:15:00	D	contr_bf	1.05152	67.9245	31.8059	0.269542	67.9417	0.362603
2	2020-09-01 02:44:59	D	contr_bf	0.852822	75.2206	24.5078	0.271555	32.9646	0.28161
2	2020-09-01 09:15:00	L	conrt_coin	4.73028	7.54339	91.4553	1.00134	37.9381	0.950095
2	2020-09-01 09:45:00	L	conrt_coin	3.46112	2.13904	94.3182	3.54278	35.5133	0.791836
2	2020-09-01 10:14:59	L	conrt_coin	3.59099	12.0828	84.98	2.93725	19.6518	0.4032
2	2020-09-01 10:45:00	L	conrt_coin	2.90822	7.87717	90.0534	2.06943	78.9661	0.854281
2	2020-09-01 11:15:00	L	conrt_coin	2.35344	8.2777	91.7223	0	19.7712	0.46955
2	2020-09-01 11:44:59	L	conrt_coin	2.18435	18.1029	81.8971	0	20.5624	0.330407
2	2020-09-01 15:15:00	L	contr_aft	2.48172	21.1898	78.5428	0.26738	21.4915	0.325515
2	2020-09-01 15:45:00	L	contr_aft	1.91865	15.508	84.492	0	27.4079	0.201508
2	2020-09-01 16:14:59	L	contr_aft	2.21888	16.0214	83.9786	0	27.0729	0.339007
2	2020-09-01 16:45:00	L	contr_aft	2.44631	14.6293	85.3039	0.0668	31.0655	0.340856
2	2020-09-01 17:15:00	L	contr_aft	3.3537	5.55556	94.1098	0.334672	28.7408	0.832378
2	2020-09-01 17:44:59	L	contr_aft	0.375119	95.0809	4.91914	0	75.9846	0.33593
2	2020-09-01 18:15:00	L	contr_aft	1.83985	17.2181	82.7819	0	24.523	0.157367
2	2020-09-01 18:45:00	L	contr_aft	1.81478	31.1289	68.8711	0	25.4137	0.307313
2	2020-09-01 19:14:59	L	contr_aft	1.72847	35.6522	64.214	0.133779	26.3137	0.24996
2	2020-09-01 19:45:00	L	contr_aft	2.70735	3.8796	95.786	0.334448	21.4321	0.388484
2	2020-09-01 20:15:00	L	contr_aft	2.07324	14.4957	85.4375	0.0668	21.1211	0.19424
2	2020-09-01 20:44:59	L	contr_aft	1.56433	33.7341	66.2659	0	27.5709	0.119327
3	2020-08-29 00:15:00	D	contr_bf	0.953339	66.4883	33.3779	0.133779	50.3793	0.113857
3	2020-08-29 00:45:00	D	contr_bf	0.619757	86.2719	13.7281	0	44.1842	0.131568
3	2020-08-29 01:14:59	D	contr_bf	1.61347	56.5508	41.7112	1.73797	63.9081	0.400437
3	2020-08-29 01:45:00	D	contr_bf	0.767725	76.9697	23.0303	0	38.8453	0.262803
3	2020-08-29 02:15:00	D	contr_bf	0.513612	87.4581	12.5419	0	73.9223	0.069892
3	2020-08-29 02:44:59	D	contr_bf	0.846224	76.4825	23.4501	0.067385	44.0171	0.118496
3	2020-08-29 09:15:00	L	conrt_coin	4.27832	0.467602	95.8584	3.67401	20.9765	0.284386
3	2020-08-29 09:45:00	L	conrt_coin	3.71223	0.668003	98.5972	0.734803	21.0837	0.590253
3	2020-08-29 10:14:59	L	conrt_coin	4.01698	4.40882	93.4536	2.13761	45.3983	0.858843
3	2020-08-29 10:45:00	L	conrt_coin	2.98389	19.5594	79.3725	1.06809	52.5698	0.98863
3	2020-08-29 11:15:00	L	conrt_coin	2.78192	3.80507	95.7944	0.400534	25.3458	0.401719
3	2020-08-29 11:44:59	L	conrt_coin	2.7868	9.54606	90.2537	0.200267	26.8589	0.370006
3	2020-08-29 15:15:00	L	contr_aft	2.28937	4.01606	95.9839	0	30.6818	0.253005
3	2020-08-29 15:45:00	L	contr_aft	2.61031	3.67401	95.1904	1.1356	23.1074	0.229109
3	2020-08-29 16:14:59	L	contr_aft	3.68764	4.47861	95.254	0.26738	33.5939	0.991465
3	2020-08-29 16:45:00	L	contr_aft	2.1793	30.9953	68.8711	0.133601	35.1953	0.96612
3	2020-08-29 17:15:00	L	contr_aft	2.68816	2.80749	97.1925	0	24.3371	0.432867
3	2020-08-29 17:44:59	L	contr_aft	2.52699	3.09491	96.9051	0	23.7983	0.341468
3	2020-08-29 18:15:00	L	contr_aft	2.08443	10.5369	89.4631	0	30.7921	0.436942
3	2020-08-29 18:45:00	L	contr_aft	2.23781	3.20427	96.7957	0	24.2698	0.254154
3	2020-08-29 19:14:59	L	contr_aft	2.90747	4.00802	94.99	1.002	23.5805	0.417854
3	2020-08-29 19:45:00	L	contr_aft	3.94525	8.01068	90.6542	1.33511	45.0373	1
3	2020-08-29 20:15:00	L	contr_aft	2.22368	2.73698	97.263	0	24.336	0.292646
3	2020-08-29 20:44:59	L	contr_aft	2.92896	2.80374	97.1963	0	21.154	0.475509
3	2020-08-30 00:15:00	D	contr_bf	0.50988	85.8204	14.1796	0	80.3636	0.10106
3	2020-08-30 00:45:00	D	contr_bf	0.672975	80.4421	19.5579	0	60.9756	0.334122
3	2020-08-30 01:14:59	D	contr_bf	0.987687	71.6398	28.2258	0.134409	41.824	0.150936
3	2020-08-30 01:45:00	D	contr_bf	0.858231	74.1216	25.7432	0.135135	39.3725	0.58952
3	2020-08-30 02:15:00	D	contr_bf	0.704424	82.2938	17.7062	0	46.1258	0.454693
3	2020-08-30 02:44:59	D	contr_bf	0.53438	85.9051	14.0949	0	45.547	0.24385
3	2020-08-30 09:15:00	L	conrt_coin	4.47286	2.33801	93.7876	3.87441	26.1585	0.660758
3	2020-08-30 09:45:00	L	conrt_coin	3.82903	2.47161	97.0608	0.467602	29.0651	0.948513
3	2020-08-30 10:14:59	L	conrt_coin	3.72241	0.601202	98.664	0.734803	25.7947	0.761562
3	2020-08-30 10:45:00	L	conrt_coin	3.02679	0.534759	99.3984	0.066845	19.4908	0.275594
3	2020-08-30 11:15:00	L	conrt_coin	3.93638	4.20842	93.0528	2.73881	39.7872	0.834601
3	2020-08-30 11:44:59	L	conrt_coin	2.58692	2.33957	97.0588	0.601604	25.2552	0.296795
3	2020-08-30 15:15:00	L	contr_aft	1.63394	17.0341	82.9659	0	31.9791	0.204541
3	2020-08-30 15:45:00	L	contr_aft	2.8168	0.802139	98.9973	0.200535	23.5706	0.418504
3	2020-08-30 16:14:59	L	contr_aft	1.85476	7.28123	92.7188	0	20.2793	0.339628
3	2020-08-30 16:45:00	L	contr_aft	2.0102	16.7557	82.9773	0.267023	24.6216	0.324995
3	2020-08-30 17:15:00	L	contr_aft	1.79053	10.0134	89.9866	0	24.743	0.343312
3	2020-08-30 17:44:59	L	contr_aft	1.8885	6.20828	93.7917	0	23.0089	0.324995
3	2020-08-30 18:15:00	L	contr_aft	2.7811	12.5585	87.3079	0.133601	66.0885	0.99905
3	2020-08-30 18:45:00	L	contr_aft	1.50797	23.0461	76.9539	0	24.4254	0.026988
3	2020-08-30 19:14:59	L	contr_aft	2.09331	12.1576	87.642	0.200401	35.7637	0.239864
3	2020-08-30 19:45:00	L	contr_aft	2.40933	4.14162	95.3908	0.467602	20.3665	0.291463
3	2020-08-30 20:15:00	L	contr_aft	4.17175	3.80507	95.3271	0.867824	44.6849	0.980153
3	2020-08-30 20:44:59	L	contr_aft	6.05754	1.2016	90.8545	7.94393	28.3816	1
3	2020-08-31 00:15:00	D	before	0.178492	100	0	0	122.15	0
3	2020-08-31 00:45:00	D	before	0.813685	76.0108	23.9892	0	37.6381	0.145119
3	2020-08-31 01:14:59	D	before	0.195721	97.6335	2.36646	0	99.4822	0.441309
3	2020-08-31 01:45:00	D	before	0.768186	82.2386	17.2922	0.469169	38.2601	0.446054
3	2020-08-31 02:15:00	D	before	0.989983	75.4339	23.8985	0.667557	32.5925	0.725082
3	2020-08-31 02:44:59	D	before	0.91622	72.7395	27.2605	0	37.1351	0.28321
3	2020-08-31 09:15:00	L	coin	4.73053	0.46729	98.2644	1.26836	27.0973	0.95683
3	2020-08-31 09:45:00	L	coin	3.78594	0.534045	98.7316	0.734312	21.0715	0.285563
3	2020-08-31 10:14:59	L	coin	1.85744	29.9866	69.8126	0.200803	32.2345	0.478218
3	2020-08-31 10:45:00	L	coin	2.20917	5.61122	94.3888	0	22.0104	0.283798
3	2020-08-31 11:15:00	L	coin	1.54571	29.9197	70.0803	0	25.1778	0.043383
3	2020-08-31 11:44:59	L	coin	2.6389	3.53805	96.3284	0.133511	24.2816	0.347622
3	2020-08-31 15:15:00	L	after	2.78087	17.5685	81.9639	0.467602	70.3049	0.99905
3	2020-08-31 15:45:00	L	after	2.19069	2.46996	97.53	0	21.7656	0.241571
3	2020-08-31 16:14:59	L	after	3.27065	1.1356	97.328	1.53641	16.8614	0.078859
3	2020-08-31 16:45:00	L	after	1.76011	15.5288	84.4712	0	21.2676	0.114371
3	2020-08-31 17:15:00	L	after	0.189884	96.2343	3.76569	0	133.338	0.079359
3	2020-08-31 17:44:59	L	after	1.8094	16.9469	82.4479	0.605245	25.0754	0.137754
3	2020-08-31 18:15:00	L	after	1.1404	47.5774	52.4226	0	29.7217	0.014127
3	2020-08-31 18:45:00	L	after	1.98425	17.7689	82.1643	0.0668	37.737	0.666915
3	2020-08-31 19:14:59	L	after	3.2604	12.5501	85.7143	1.73565	89.9876	1
3	2020-08-31 19:45:00	L	after	4.70885	1.57729	92.9022	5.5205	20.2759	0.759643
3	2020-08-31 20:15:00	L	after	1.62813	34.8123	65.1877	0	23.4908	0.297389
3	2020-08-31 20:44:59	L	after	1.81591	10.8812	88.9853	0.133511	21.9937	0.347622
3	2020-09-01 00:15:00	D	contr_bf	0.478209	89.2473	10.7527	0	46.9962	0.57495
3	2020-09-01 00:45:00	D	contr_bf	0.168282	98.6568	1.34318	0	130.485	0.899478
3	2020-09-01 01:14:59	D	contr_bf	0.584995	86.5862	13.4138	0	48.1671	0.089909
3	2020-09-01 01:45:00	D	contr_bf	1.25118	62.4582	37.2745	0.267201	38.6511	0.394252
3	2020-09-01 02:15:00	D	contr_bf	0.883203	73.1642	26.8358	0	35.8324	0.18424
3	2020-09-01 02:44:59	D	contr_bf	1.00273	67.7614	32.1046	0.134048	49.9695	0.324995
3	2020-09-01 09:15:00	L	conrt_coin	6.24918	3.89785	77.6882	18.414	47.6964	1
3	2020-09-01 09:45:00	L	conrt_coin	4.78393	4.74599	86.9652	8.28877	54.0142	0.928359
3	2020-09-01 10:14:59	L	conrt_coin	3.49771	13.3511	84.8465	1.8024	68.7619	0.881685
3	2020-09-01 10:45:00	L	conrt_coin	0.023269	100	0	0	205.887	0
3	2020-09-01 11:15:00	L	conrt_coin	3.57875	0.600801	97.8638	1.53538	20.2659	0.332292
3	2020-09-01 11:44:59	L	conrt_coin	2.61983	2.93725	96.4619	0.600801	22.203	0.274426
3	2020-09-01 15:15:00	L	contr_aft	2.73367	10.8884	88.978	0.133601	30.5556	0.454693
3	2020-09-01 15:45:00	L	contr_aft	2.56365	3.07692	96.8562	0.06689	26.6966	0.375031
3	2020-09-01 16:14:59	L	contr_aft	3.63748	5.40721	93.1909	1.40187	31.5637	0.905752
3	2020-09-01 16:45:00	L	contr_aft	2.83125	11.9064	87.3579	0.735786	63.2587	0.888779
3	2020-09-01 17:15:00	L	contr_aft	3.64826	1.22034	98.3051	0.474576	31.9858	0.935604
3	2020-09-01 17:44:59	L	contr_aft	1.67454	35.1369	64.6627	0.200401	34.7446	0.166941
3	2020-09-01 18:15:00	L	contr_aft	2.47442	3.87701	96.123	0	23.4236	0.395318
3	2020-09-01 18:45:00	L	contr_aft	2.78165	3.20427	96.5955	0.200267	37.2167	0.145647
3	2020-09-01 19:14:59	L	contr_aft	2.81052	5.61122	93.8544	0.534402	33.886	0.513213
3	2020-09-01 19:45:00	L	contr_aft	2.59927	3.94649	96.0535	0	25.5608	0.474833
3	2020-09-01 20:15:00	L	contr_aft	3.72812	0	99.2657	0.734312	20.2231	0.428281
3	2020-09-01 20:44:59	L	contr_aft	3.74235	8.47797	90.3872	1.13485	40.703	0.950358
4	2020-08-29 00:15:00	D	contr_bf	2.85052	14.4675	85.2646	0.267917	41.7847	0.972978
4	2020-08-29 00:45:00	D	contr_bf	3.51042	9.27904	90.5207	0.200267	36.3108	1
4	2020-08-29 01:14:59	D	contr_bf	3.78996	4.40977	95.1153	0.474898	31.1561	1
4	2020-08-29 01:45:00	D	contr_bf	2.40903	12.3159	86.8139	0.870147	37.4169	0.843777
4	2020-08-29 02:15:00	D	contr_bf	3.85431	3.36022	95.8333	0.806452	44.8805	1
4	2020-08-29 02:44:59	D	contr_bf	3.29922	6.35995	92.6928	0.947226	72.3738	0.985122
4	2020-08-29 09:15:00	L	conrt_coin	2.89919	4.07482	95.5244	0.400802	20.9445	0.687516
4	2020-08-29 09:45:00	L	conrt_coin	3.36596	4.93992	94.6595	0.400534	19.9244	0.813745
4	2020-08-29 10:14:59	L	conrt_coin	4.24311	2.93725	95.8611	1.2016	17.5562	0.941053
4	2020-08-29 10:45:00	L	conrt_coin	3.13332	9.23077	89.9666	0.802676	17.9342	0.455671
4	2020-08-29 11:15:00	L	conrt_coin	3.5632	10.3957	85.7814	3.82294	15.9734	0.213545
4	2020-08-29 11:44:59	L	conrt_coin	4.79583	3.55705	89.7987	6.64429	22.468	0.576698
4	2020-08-29 15:15:00	L	contr_aft	2.99725	0	99.3311	0.668896	17.7702	0.396291
4	2020-08-29 15:45:00	L	contr_aft	2.62545	4.34202	95.324	0.334001	20.7794	0.455006
4	2020-08-29 16:14:59	L	contr_aft	2.99593	2.27425	97.1906	0.535117	18.2908	0.445723
4	2020-08-29 16:45:00	L	contr_aft	4.57494	1.53641	96.7268	1.73681	42.0069	1
4	2020-08-29 17:15:00	L	contr_aft	1.94575	18.9993	81.0007	0	19.8992	0.241488
4	2020-08-29 17:44:59	L	contr_aft	1.75232	24.131	75.8021	0.066845	22.6818	0.31594
4	2020-08-29 18:15:00	L	contr_aft	2.43944	10.8957	89.1043	0	30.2867	0.717019
4	2020-08-29 18:45:00	L	contr_aft	3.2173	4.81283	94.7193	0.467914	25.9013	0.781699
4	2020-08-29 19:14:59	L	contr_aft	2.12618	4.60922	95.2572	0.133601	21.1004	0.331176
4	2020-08-29 19:45:00	L	contr_aft	3.36321	0	99.1984	0.801603	16.5111	0.416908
4	2020-08-29 20:15:00	L	contr_aft	1.68661	33.9357	66.0643	0	22.142	0.166346
4	2020-08-29 20:44:59	L	contr_aft	2.63039	3.40454	96.5955	0	21.1114	0.559539
4	2020-08-30 00:15:00	D	contr_bf	0.750959	78.6096	21.3904	0	54.977	0.081125
4	2020-08-30 00:45:00	D	contr_bf	0.704611	74.681	25.319	0	41.7749	0.092461
4	2020-08-30 01:14:59	D	contr_bf	0.36028	91.1469	8.85312	0	79.1085	0.001449
4	2020-08-30 01:45:00	D	contr_bf	0.695959	80.0669	19.9331	0	44.124	0.154926
4	2020-08-30 02:15:00	D	contr_bf	0.109241	99.5733	0.426743	0	156.921	0
4	2020-08-30 02:44:59	D	contr_bf	0.338977	90.4277	9.5723	0	53.9225	0.148982
4	2020-08-30 09:15:00	L	conrt_coin	2.23344	15.5645	83.3667	1.0688	19.568	0.165254
4	2020-08-30 09:45:00	L	conrt_coin	2.27316	8.75084	90.9152	0.334001	24.6522	0.451021
4	2020-08-30 10:14:59	L	conrt_coin	2.2829	5.94125	93.9252	0.133511	19.9244	0.437153
4	2020-08-30 10:45:00	L	conrt_coin	1.74064	29.2503	70.7497	0	25.1877	0.429284
4	2020-08-30 11:15:00	L	conrt_coin	3.48394	3.81016	95.7219	0.467914	31.8009	0.638241
4	2020-08-30 11:44:59	L	conrt_coin	2.57385	14.0562	84.9398	1.00402	21.5512	0.721726
4	2020-08-30 15:15:00	L	contr_aft	2.28577	9.01202	90.988	0	23.5897	0.674485
4	2020-08-30 15:45:00	L	contr_aft	2.32608	4.81283	95.1872	0	20.7753	0.611578
4	2020-08-30 16:14:59	L	contr_aft	2.61694	14.753	84.9132	0.333778	42.383	0.583181
4	2020-08-30 16:45:00	L	contr_aft	2.38554	9.01804	90.982	0	17.9632	0.542564
4	2020-08-30 17:15:00	L	contr_aft	2.04739	6.01202	93.988	0	20.9494	0.544676
4	2020-08-30 17:44:59	L	contr_aft	3.03668	13.7032	85.5615	0.735294	35.4836	0.877803
4	2020-08-30 18:15:00	L	contr_aft	2.41961	5.40721	93.992	0.600801	23.4629	0.26062
4	2020-08-30 18:45:00	L	contr_aft	3.50625	6.88043	92.986	0.133601	33.3765	0.926837
4	2020-08-30 19:14:59	L	contr_aft	2.34554	2.07081	97.9292	0	22.1506	0.441102
4	2020-08-30 19:45:00	L	contr_aft	2.42248	7.49164	92.3077	0.200669	16.7625	0.324453
4	2020-08-30 20:15:00	L	contr_aft	2.73776	2.87241	97.0608	0.0668	21.2724	0.86083
4	2020-08-30 20:44:59	L	contr_aft	2.20715	5.21042	94.7896	0	17.3728	0.518823
4	2020-08-31 00:15:00	D	before	0.573532	84.8262	15.1738	0	42.2953	0.066326
4	2020-08-31 00:45:00	D	before	0.410459	89.7712	10.2288	0	65.8322	0.064805
4	2020-08-31 01:14:59	D	before	0.692453	80.3071	19.6262	0.066756	43.1697	0.12811
4	2020-08-31 01:45:00	D	before	1.71766	33.7784	65.5541	0.667557	43.6353	0.564525
4	2020-08-31 02:15:00	D	before	1.99469	26.393	73.3138	0.293255	34.251	0.91048
4	2020-08-31 02:44:59	D	before	0.224594	95.8564	4.14365	0	92.237	0
4	2020-08-31 09:15:00	L	coin	3.68333	2.13618	97.4633	0.400534	20.3645	0.883996
4	2020-08-31 09:45:00	L	coin	3.90424	3.73832	93.4579	2.80374	16.2135	0.734342
4	2020-08-31 10:14:59	L	coin	4.72225	1.60321	96.5932	1.80361	23.6481	0.759862
4	2020-08-31 10:45:00	L	coin	4.22439	0.668003	98.0628	1.2692	18.2498	0.538348
4	2020-08-31 11:15:00	L	coin	2.05999	26.1364	73.5294	0.334225	17.3594	0.309286
4	2020-08-31 11:44:59	L	coin	4.67255	4.53939	90.2537	5.20694	17.6176	0.597681
4	2020-08-31 15:15:00	L	after	3.73888	4.40587	94.5928	1.00134	40.3432	0.968925
4	2020-08-31 15:45:00	L	after	2.46901	7.94393	91.6555	0.400534	31.0382	0.407854
4	2020-08-31 16:14:59	L	after	1.93073	15.1272	84.8059	0.066934	17.2972	0.457003
4	2020-08-31 16:45:00	L	after	2.06639	10.0936	89.9064	0	18.4359	0.443081
4	2020-08-31 17:15:00	L	after	1.29049	40.9365	59.0635	0	29.3808	0.045179
4	2020-08-31 17:44:59	L	after	1.33638	46.5955	53.4045	0	19.6971	0.230017
4	2020-08-31 18:15:00	L	after	0.795922	70.301	29.699	0	38.0322	0.061261
4	2020-08-31 18:45:00	L	after	2.72182	8.15508	91.5107	0.334225	29.0174	0.807122
4	2020-08-31 19:14:59	L	after	1.45613	35.1802	64.8198	0	24.1674	0.246103
4	2020-08-31 19:45:00	L	after	2.20774	19.1845	80.7487	0.066845	17.4005	0.521464
4	2020-08-31 20:15:00	L	after	1.92571	23.0461	76.9539	0	15.901	0.42667
4	2020-08-31 20:44:59	L	after	3.36159	3.53805	94.4593	2.00267	27.9143	0.793954
4	2020-09-01 00:15:00	D	contr_bf	2.7392	14.4957	85.1035	0.400802	47.6586	0.877961
4	2020-09-01 00:45:00	D	contr_bf	0.846125	75.641	24.359	0	33.0923	0.187805
4	2020-09-01 01:14:59	D	contr_bf	0.835149	74.3779	25.6221	0	28.1027	0.383546
4	2020-09-01 01:45:00	D	contr_bf	0.706069	80.0941	19.7041	0.201748	35.111	0.069709
4	2020-09-01 02:15:00	D	contr_bf	0.621832	81.6313	18.3687	0	37.3068	0.25015
4	2020-09-01 02:44:59	D	contr_bf	0.515325	86.0309	13.9691	0	52.5855	0.121223
4	2020-09-01 09:15:00	L	conrt_coin	5.23237	0	95.7916	4.20842	14.7466	0.666868
4	2020-09-01 09:45:00	L	conrt_coin	5.24247	2.00401	91.7168	6.27923	19.0582	0.771959
4	2020-09-01 10:14:59	L	conrt_coin	3.68865	2.93921	96.5932	0.467602	20.7824	0.731179
4	2020-09-01 10:45:00	L	conrt_coin	3.23361	2.00401	97.662	0.334001	25.0387	0.638241
4	2020-09-01 11:15:00	L	conrt_coin	3.46948	1.67001	97.7288	0.601202	17.2429	0.591139
4	2020-09-01 11:44:59	L	conrt_coin	3.91076	2.93725	94.3258	2.73698	18.4652	0.344096
4	2020-09-01 15:15:00	L	contr_aft	3.4326	3.34001	96.0588	0.601202	21.0177	0.788224
4	2020-09-01 15:45:00	L	contr_aft	2.73615	5.14019	94.7931	0.066756	25.4037	0.750247
4	2020-09-01 16:14:59	L	contr_aft	1.82791	35.1171	64.3478	0.535117	99.753	0.897871
4	2020-09-01 16:45:00	L	contr_aft	3.73916	4.34202	95.1236	0.534402	38.6971	0.857424
4	2020-09-01 17:15:00	L	contr_aft	3.83673	3.00601	95.9252	1.0688	25.6396	0.837127
4	2020-09-01 17:44:59	L	contr_aft	2.5724	15.02	84.7797	0.200267	45.7343	0.809603
4	2020-09-01 18:15:00	L	contr_aft	4.18276	5.81162	92.652	1.53641	44.5256	1
4	2020-09-01 18:45:00	L	contr_aft	2.30285	20.7081	79.0915	0.200401	37.1771	0.61894
4	2020-09-01 19:14:59	L	contr_aft	4.96498	6.15385	88.0936	5.75251	38.8278	0.918009
4	2020-09-01 19:45:00	L	contr_aft	2.40225	10.2136	89.7864	0	25.5873	0.637495
4	2020-09-01 20:15:00	L	contr_aft	4.31381	2.87818	94.913	2.20884	39.6099	0.956284
4	2020-09-01 20:44:59	L	contr_aft	3.26251	8.41122	90.988	0.600801	32.8492	0.765497

## Sheet: averaged_contr
Fish	Avg. swimming speed (cm/s)				control	events 31/08			Freezing time (%)				control	events 31/08			Swimming time (%)				control	events 31/08			Rapid movement time (%)				control	events 31/08			Meandering (°/cm)				control	events 31/08			"Walls/Inner area" ratio				control	events 31/08
1	4.22391	0.180509	5.21587		3.20676	0.176059	before		7.17639	98.6622	7.8052		37.8813	98.9011	before		87.9946	1.33779	87.1915		58.8413	1.0989	before		4.82897	0	5.00334		3.27744	0	before		42.019	178.239	36.0478		85.4353	157.611	before		0.940161	0	0.982664		0.640942	0	before
1	4.21468	0.542555	3.749		2.83541	0.275859	before		13.6735	88.3534	13.9456		38.6575	95.7718	before		82.2449	10.9103	81.9048		58.3533	4.22819	before		4.08163	0.736278	4.14966		2.98919	0	before		62.2985	76.0851	56.4231		64.9356	113.991	before		1	0.037386	0.854658		0.630681	0	before
1	3.43831	1.0566	3.43483		2.64324	0.224979	before		9.35397	66.2433	21.3904		32.3292	96.8478	before		89.6366	33.4893	74.5989		65.9083	3.15225	before		1.00942	0.26738	4.0107		1.7625	0	before		40.7778	47.223	52.5633		46.8547	109.151	before		0.857406	0.144742	0.914816		0.638988	0	before
1	2.26187	0.33956	3.39318		1.9982	0.393042	before		10.5802	93.5204	10.5874		38.2293	91.5888	before		89.0785	6.47963	86.8852		60.8145	8.21095	before		0.341297	0	2.52732		0.956206	0.200267	before		32.8352	110.182	61.4681		68.1617	71.8897	before		0.297557	0	1		0.432519	0.339025	before
1	1.53178	0.504048	2.96473		1.66685	0.236754	before		36.8527	89.8179	8.78016		45.1503	98.0014	before		63.1473	9.57518	89.7453		54.1559	1.99862	before		0	0.606878	1.47453		0.693803	0	before		32.2872	69.6388	70.994		57.64	107.299	before		0.236089	0.029428	0.92231		0.395942	0	before
1	2.30767	1.02766	0.574208		1.30318	0.770559	before		23.3785	61.8614	89.5722		58.2707	80.6818	before		76.3364	37.9986	10.361		41.5653	18.7834	before		0.285103	0.139958	0.066845		0.163969	0.534759	before		50.3442	44.6301	72.8789		55.951	51.6183	before		1	0.244119	0.852942		0.69902	0.120684	before
1	2.44368	2.04725	4.42239		2.97111	4.05939	coin		4.20561	5.54442	1.60535		3.78513	0	coin		94.9933	94.3888	95.5853		94.9891	98.7316	coin		0.801068	0.0668	2.80937		1.22574	1.26836	coin		25.3327	27.6649	50.6409		34.5462	26.8494	coin		0.229739	0.465563	0.846193		0.513832	0.778479	coin
1	1.14765	1.78346	3.37492		2.10201	4.56104	coin		52.4733	15.4977	1.2016		23.0575	0.535117	coin		47.5267	84.0347	98.3979		76.6531	97.7258	coin		0	0.467602	0.400534		0.289379	1.73913	coin		32.159	27.7493	21.828		27.2454	34.358	coin		0.155568	0.295293	0.555778		0.335546	0.98447	coin
1	3.60431	2.05254	2.39514		2.684	2.93771	coin		4.07482	14.7157	6.4753		8.42194	4.87316	coin		94.656	84.0803	93.3244		90.6869	94.259	coin		1.2692	1.20401	0.200267		0.891162	0.867824	coin		47.5371	27.0807	27.3803		33.9993	20.9194	coin		0.90527	0.405168	0.440332		0.58359	0.458217	coin
1	1.98807	1.3346	3.93087		2.41785	2.23194	coin		14.4482	30.7281	4.87642		16.6842	17.4699	coin		85.2843	69.2719	93.5204		82.6922	81.3253	coin		0.267559	0	1.60321		0.623588	1.20482	coin		29.3049	28.7731	46.7849		34.9543	19.6636	coin		0.399385	0.159377	0.913997		0.49092	0.408391	coin
1	1.63471	3.49214	2.54839		2.55841	0.690709	coin		9.95989	2.4032	0.668896		4.344	77.036	coin		90.0401	96.5955	99.2642		95.2999	22.964	coin		0	1.00134	0.06689		0.356075	0	coin		28.607	34.2757	25.1881		29.3569	59.2494	coin		0.429175	0.753555	0.404525		0.529085	0.516584	coin
1	2.13382	2.0396	2.41307		2.1955	2.76191	coin		6.88043	14.5053	6.21658		9.20078	4.27522	coin		92.9192	84.893	93.115		90.3091	95.0568	coin		0.200401	0.601604	0.668449		0.490151	0.668003	coin		39.2388	39.0963	22.5705		33.6352	24.9558	coin		0.700901	0.503502	0.302493		0.502299	0.561456	coin
1	1.63132	1.56858	2.65577		1.95189	2.95755	after		17.4232	20.2007	3.81271		13.8122	3.87183	after		82.5768	79.7993	95.3846		85.9202	95.6609	after		0	0	0.802676		0.267559	0.46729	after		27.7311	27.3003	25.6053		26.8789	47.5048	after		0.510374	0.593772	0.520045		0.541397	0.928049	after
1	1.38103	3.11109	3.20799		2.5667	1.4974	after		48.3612	5.21042	5.88235		19.818	18.3946	after		50.5686	94.5892	93.4492		79.5356	81.6054	after		1.07023	0.200401	0.668449		0.646361	0	after		29.7117	55.0256	50.9151		45.2174	24.3793	after		0.213802	1	0.943991		0.719264	0.514512	after
1	1.93293	1.47359	3.47503		2.29385	2.44234	after		8.87851	21.7101	5.34402		11.9775	71.3014	after		90.7877	78.2899	93.654		87.5772	20.7534	after		0.333778	0	1.002		0.445261	7.9452	after		33.5693	30.4748	73.644		45.896	19.2562	after		0.524902	0.466233	1		0.663712	0.027446	after
1	1.6408	3.58602	1.53837		2.25506	1.78205	after		10.8216	2.40803	16.0989		9.77618	59.012	after		89.1784	96.7893	83.9011		89.9563	37.5834	after		0	0.802676	0		0.267559	3.40454	after		27.014	36.1508	31.9571		31.7073	24.4047	after		0.437699	0.830268	0.258642		0.50887	0.66568	after
1	1.78298	3.28641	3.347		2.80546	1.50161	after		15.5288	6.34603	4.80962		8.89481	26.8097	after		84.4712	92.7188	94.99		90.7267	73.1233	after		0	0.935204	0.200401		0.378535	0.067024	after		25.1491	50.1703	36.7536		37.3577	30.1221	after		0.530472	1	0.414208		0.648227	0.371422	after
1	2.16703	2.85441	1.32854		2.11666	2.23514	after		2.80374	11.4381	26.3193		13.5204	9.21938	after		97.1295	87.7592	73.6807		86.1898	88.9637	after		0.066756	0.802676	0		0.289811	1.81696	after		32.9829	50.7776	26.1514		36.6373	25.3814	after		0.497343	0.960075	0.257475		0.571631	0.51866	after
1	1.89683	2.10089	1.9794		1.99237	1.21101	after		5.70087	13.6364	9.36455		9.56726	42.0455	after		94.0979	85.762	90.6355		90.1651	57.9545	after		0.201207	0.601604	0		0.267604	0	after		28.6781	26.9953	43.2083		32.9606	24.5632	after		0.556487	0.524208	0.643851		0.574849	0.282776	after
1	1.87651	1.74043	3.60191		2.40629	2.26507	after		20.2405	10.8434	3.48525		11.523	7.29585	after		79.6927	89.0228	94.9732		87.8962	92.7041	after		0.0668	0.133869	1.54156		0.580741	0	after		33.3525	27.9183	71.0439		44.1049	22.3727	after		0.622307	0.467572	0.725846		0.605242	0.312148	after
1	2.58429	1.44894	2.1976		2.07694	1.85077	after		9.35204	29.7063	3.20427		14.0875	22.6453	after		89.4456	70.2937	96.7957		85.5117	77.2879	after		1.2024	0	0		0.400802	0.0668	after		37.6581	26.352	30.656		31.5553	24.487	after		0.582928	0.410974	0.407746		0.467216	0.397462	after
1	1.3393	1.32758	1.8926		1.51983	2.07007	after		34.6309	57.9545	8.14419		33.5765	14.4674	after		65.3691	40.9759	91.8558		66.067	85.5326	after		0	1.06952	0		0.356506	0	after		35.7812	23.8388	32.697		30.7723	29.2813	after		0.456885	0.187441	0.340875		0.3284	0.60468	after
1	1.83299	1.06023	1.59122		1.49481	2.21684	after		9.61282	52.9766	15.2406		25.9433	13.061	after		90.3872	47.0234	84.6925		74.0344	86.2023	after		0	0	0.066845		0.0222817	0.736772	after		35.973	30.1722	34.1554		33.4335	20.4631	after		0.431793	0.176921	0.436385		0.348366	0.489168	after
1	1.40018	0.484149	1.48822		1.12418	2.66753	after		35.5853	88.3456	27.2727		50.4012	49.4043	after		64.2809	11.6544	72.5936		49.5096	42.9573	after		0.133779	0	0.13369		0.0891563	7.6384	after		37.4774	47.8596	58.6836		48.0069	20.8777	after		0.348299	0.085619	0.593772		0.342563	0.195801	after
2	2.79127	0.482967	0.191805		1.15535	0.597846	before		8.71898	88.5675	99.2832		65.5232	84.5775	before		91.0127	11.2948	0.716846		34.3415	15.0704	before		0.268276	0.137741	0		0.135339	0.352113	before		51.3843	60.8555	125.688		79.3092	51.2762	before		0.949764	0.027371	0		0.325712	0.092635	before
2	3.19909	0.587286	0.220433		1.3356	1.30847	before		8.70147	83.8019	97.5267		63.3434	52.8898	before		90.3614	15.5288	2.47326		36.1212	46.8414	before		0.937082	0.669344	0		0.535475	0.268817	before		68.9293	46.6297	290.934		135.498	28.7174	before		1	0.030874	0		0.343625	0.649951	before
2	3.53625	0.219397	0.469162		1.40827	0.487676	before		4.62467	95.6989	89.4666		63.2634	89.7017	before		94.437	4.30107	10.5334		36.4238	10.0142	before		0.938338	0	0		0.312779	0.284091	before		61.2393	110.112	55.8134		75.7217	37.2609	before		1	0	0.070576		0.356859	0.052293	before
2	3.04047	0.302684	0.722209		1.35512	0.288189	before		8.54473	93.7371	76.9591		59.747	94.8735	before		90.988	5.98761	23.0409		40.0055	5.12645	before		0.46729	0.275292	0		0.247527	0	before		49.5393	79.16	48.7253		59.1415	143.003	before		0.99908	0.033806	0.075125		0.369337	0	before
2	0.715161	0.897311	1.05152		0.887997	0.496526	before		77.8075	75.4875	67.9245		73.7398	88.2641	before		22.1925	24.0251	31.8059		26.0078	11.7359	before		0	0.487465	0.269542		0.252336	0	before		52.3689	41.2827	67.9417		53.8644	42.5571	before		0.052293	0.182026	0.362603		0.198974	0.052293	before
2	0.384605	0.818509	0.852822		0.685312	0.930512	before		92.3025	83.4455	75.2206		83.6562	77.5387	before		7.69746	15.5451	24.5078		15.9168	21.6543	before		0	1.00942	0.271555		0.426992	0.806994	before		85.1187	48.202	32.9646		55.4284	44.4165	before		0.037284	0.081793	0.28161		0.133562	0.25054	before
2	2.7067	2.56392	4.73028		3.33363	2.06566	coin		16.9786	9.93243	7.54339		11.4848	26.4352	coin		81.6845	86.8243	91.4553		86.6547	73.498	coin		1.3369	3.24324	1.00134		1.86049	0.066756	coin		24.9502	19.1119	37.9381		27.3334	20.541	coin		0.340856	0.438318	0.950095		0.576423	0.44425	coin
2	2.5228	2.00193	3.46112		2.66195	2.84649	coin		14.4578	14.2241	2.13904		10.2737	5.48495	coin		85.2744	84.842	94.3182		88.1449	94.3144	coin		0.267738	0.933908	3.54278		1.58148	0.200669	coin		24.1942	26.019	35.5133		28.5755	17.0474	coin		0.407062	0.505551	0.791836		0.56815	0.548713	coin
2	2.302	2.49587	3.59099		2.79629	2.39761	coin		13.1597	33.9572	12.0828		19.7332	18.9586	coin		86.8403	65.9759	84.98		79.2654	81.0414	coin		0	0.066845	2.93725		1.00137	0	coin		30.7873	36.8659	19.6518		29.1017	23.638	coin		0.358228	0.47493	0.4032		0.412119	0.48914	coin
2	2.4241	2.35541	2.90822		2.56258	1.94056	coin		20.4885	15.3846	7.87717		14.5834	25.2005	coin		79.4437	84.214	90.0534		84.5704	74.7995	coin		0.067843	0.401338	2.06943		0.846202	0	coin		23.1615	22.2845	78.9661		41.4707	28.6386	coin		0.457514	0.270983	0.854281		0.527593	0.399988	coin
2	1.66358	2.86436	2.35344		2.29379	2.2971	coin		7.08556	17.6903	8.2777		11.0178	66.0881	coin		92.5134	82.3097	91.7223		88.8485	33.0441	coin		0.40107	0	0		0.13369	0.867824	coin		31.6053	22.833	19.7712		24.7365	31.0131	coin		0.691037	0.380863	0.46955		0.513817	0.498002	coin
2	2.3169	2.37542	2.18435		2.29222	1.56501	coin		3.13752	8.61148	18.1029		9.95062	47.1257	coin		91.255	90.3872	81.8971		87.8464	52.8743	coin		5.60748	1.00134	0		2.20294	0	coin		23.935	21.1556	20.5624		21.8843	22.1037	coin		0.485067	0.492542	0.330407		0.436005	0.239562	coin
2	3.27805	1.40947	2.48172		2.38975	0.77073	after		15.1576	42.5703	21.1898		26.3059	72.2296	after		83.2327	57.4297	78.5428		73.0684	27.7704	after		1.60966	0	0.26738		0.625679	0	after		35.1086	30.1783	21.4915		28.9262	40.0667	after		0.623119	0.289333	0.325515		0.412656	0.127809	after
2	1.74635	1.86557	1.91865		1.84352	3.69426	after		46.7246	13.6455	15.508		25.2927	13.1597	after		52.4733	86.3545	84.492		74.4399	86.1723	after		0.802139	0	0		0.26738	0.668003	after		32.4385	22.135	27.4079		27.3271	41.7986	after		0.192568	0.416761	0.201508		0.270279	0.791018	after
2	2.7008	0.816908	2.21888		1.9122	0.94561	after		18.1145	69.6177	16.0214		34.5845	66.1323	after		81.6835	30.3823	83.9786		65.3481	33.8677	after		0.20202	0	0		0.06734	0	after		39.321	43.4517	27.0729		36.6152	43.8264	after		0.716655	0.154654	0.339007		0.403439	0.13367	after
2	1.6129	1.41907	2.44631		1.82609	0.06874	after		37.5418	48.1431	14.6293		33.4381	100	after		62.4582	51.8569	85.3039		66.5397	0	after		0	0	0.0668		0.0222667	0	after		42.0533	22.7064	31.0655		31.9417	172.382	after		0.377699	0.282202	0.340856		0.333586	0	after
2	0.789079	3.49052	3.3537		2.54443	1.45204	after		76.387	14.1522	5.55556		32.0316	44.4595	after		23.5453	85.7143	94.1098		67.7898	55.5405	after		0.067659	0.133511	0.334672		0.178614	0	after		56.8558	45.8102	28.7408		43.8023	30.1278	after		0.105654	0.825693	0.832378		0.587908	0.50829	after
2	1.26817	0.649025	0.375119		0.764104	1.41284	after		52.6738	73.6842	95.0809		73.813	52.7815	after		47.3262	26.3158	4.91914		26.187	46.8792	after		0	0	0		0	0.339213	after		44.7404	39.8391	75.9846		53.5214	25.335	after		0.202629	0.196472	0.33593		0.24501	0.146546	after
2	0.946482	3.41631	1.83985		2.06755	1.53776	after		68.8129	7.61523	17.2181		31.2154	44.8529	after		31.1871	92.1176	82.7819		68.6955	55.0802	after		0	0.267201	0		0.089067	0.066845	after		44.3686	42.3433	24.523		37.0783	24.6497	after		0.160086	0.807443	0.157367		0.374965	0.294704	after
2	1.38921	1.47621	1.81478		1.56006	1.35841	after		50.8678	47.3614	31.1289		43.1194	38.3534	after		48.3979	52.5718	68.8711		56.6136	61.6466	after		0.734312	0.0668	0		0.267037	0	after		41.6883	29.8177	25.4137		32.3066	28.0418	after		0.085913	0.243597	0.307313		0.212274	0.407707	after
2	2.331	1.7931	1.72847		1.95085	3.93848	after		28.2565	34.6462	35.6522		32.8516	5.61122	after		71.7435	65.3538	64.214		67.1038	93.0528	after		0	0	0.133779		0.044593	1.33601	after		24.6867	24.1935	26.3137		25.0646	33.1054	after		0.328571	0.367618	0.24996		0.315383	0.74585	after
2	3.76179	0.828291	2.70735		2.43248	2.55092	after		6.34179	75.5689	3.8796		28.5968	14.9733	after		93.3244	24.4311	95.786		71.1805	84.1578	after		0.333778	0	0.334448		0.222742	0.868984	after		36.8423	33.7718	21.4321		30.682	23.0365	after		0.857676	0.201508	0.388484		0.482556	0.482016	after
2	1.12662	1.48732	2.07324		1.56239	4.51627	after		62.4582	34.8525	14.4957		37.2688	3.40454	after		37.5418	65.1475	85.4375		62.7089	94.7263	after		0	0	0.0668		0.0222667	1.86916	after		48.2025	27.8186	21.1211		32.3807	36.051	after		0.200387	0.228667	0.19424		0.207765	0.932285	after
2	1.65131	1.08122	1.56433		1.43229	1.72671	after		42.1228	61.6622	33.7341		45.8397	35.8528	after		57.8104	38.2708	66.2659		54.1157	63.4114	after		0.066756	0.067024	0		0.0445933	0.735786	after		28.0944	30.1874	27.5709		28.6176	26.2447	after		0.298295	0.16063	0.119327		0.192751	0.351379	after
3	0.953339	0.50988	0.478209		0.647143	0.178492	before		66.4883	85.8204	89.2473		80.5187	100	before		33.3779	14.1796	10.7527		19.4367	0	before		0.133779	0	0		0.044593	0	before		50.3793	80.3636	46.9962		59.2463	122.15	before		0.113857	0.10106	0.57495		0.263289	0	before
3	0.619757	0.672975	0.168282		0.487005	0.813685	before		86.2719	80.4421	98.6568		88.4569	76.0108	before		13.7281	19.5579	1.34318		11.5431	23.9892	before		0	0	0		0	0	before		44.1842	60.9756	130.485		78.5484	37.6381	before		0.131568	0.334122	0.899478		0.455056	0.145119	before
3	1.61347	0.987687	0.584995		1.06205	0.195721	before		56.5508	71.6398	86.5862		71.5923	97.6335	before		41.7112	28.2258	13.4138		27.7836	2.36646	before		1.73797	0.134409	0		0.624126	0	before		63.9081	41.824	48.1671		51.2997	99.4822	before		0.400437	0.150936	0.089909		0.213761	0.441309	before
3	0.767725	0.858231	1.25118		0.959044	0.768186	before		76.9697	74.1216	62.4582		71.1832	82.2386	before		23.0303	25.7432	37.2745		28.6827	17.2922	before		0	0.135135	0.267201		0.134112	0.469169	before		38.8453	39.3725	38.6511		38.9563	38.2601	before		0.262803	0.58952	0.394252		0.415525	0.446054	before
3	0.513612	0.704424	0.883203		0.700413	0.989983	before		87.4581	82.2938	73.1642		80.972	75.4339	before		12.5419	17.7062	26.8358		19.028	23.8985	before		0	0	0		0	0.667557	before		73.9223	46.1258	35.8324		51.9602	32.5925	before		0.069892	0.454693	0.18424		0.236275	0.725082	before
3	0.846224	0.53438	1.00273		0.794445	0.91622	before		76.4825	85.9051	67.7614		76.7163	72.7395	before		23.4501	14.0949	32.1046		23.2165	27.2605	before		0.067385	0	0.134048		0.0671443	0	before		44.0171	45.547	49.9695		46.5112	37.1351	before		0.118496	0.24385	0.324995		0.229114	0.28321	before
3	4.27832	4.47286	6.24918		5.00012	4.73053	coin		0.467602	2.33801	3.89785		2.23449	0.46729	coin		95.8584	93.7876	77.6882		89.1114	98.2644	coin		3.67401	3.87441	18.414		8.65414	1.26836	coin		20.9765	26.1585	47.6964		31.6105	27.0973	coin		0.284386	0.660758	1		0.648381	0.95683	coin
3	3.71223	3.82903	4.78393		4.10839	3.78594	coin		0.668003	2.47161	4.74599		2.62853	0.534045	coin		98.5972	97.0608	86.9652		94.2077	98.7316	coin		0.734803	0.467602	8.28877		3.16372	0.734312	coin		21.0837	29.0651	54.0142		34.721	21.0715	coin		0.590253	0.948513	0.928359		0.822375	0.285563	coin
3	4.01698	3.72241	3.49771		3.7457	1.85744	coin		4.40882	0.601202	13.3511		6.12038	29.9866	coin		93.4536	98.664	84.8465		92.3213	69.8126	coin		2.13761	0.734803	1.8024		1.55827	0.200803	coin		45.3983	25.7947	68.7619		46.6516	32.2345	coin		0.858843	0.761562	0.881685		0.83403	0.478218	coin
3	2.98389	3.02679	0.023269		2.01132	2.20917	coin		19.5594	0.534759	100		40.0314	5.61122	coin		79.3725	99.3984	0		59.5903	94.3888	coin		1.06809	0.066845	0		0.378312	0	coin		52.5698	19.4908	205.887		92.6493	22.0104	coin		0.98863	0.275594	0		0.421408	0.283798	coin
3	2.78192	3.93638	3.57875		3.43235	1.54571	coin		3.80507	4.20842	0.600801		2.87143	29.9197	coin		95.7944	93.0528	97.8638		95.5703	70.0803	coin		0.400534	2.73881	1.53538		1.55824	0	coin		25.3458	39.7872	20.2659		28.4663	25.1778	coin		0.401719	0.834601	0.332292		0.522871	0.043383	coin
3	2.7868	2.58692	2.61983		2.66451	2.6389	coin		9.54606	2.33957	2.93725		4.94096	3.53805	coin		90.2537	97.0588	96.4619		94.5915	96.3284	coin		0.200267	0.601604	0.600801		0.467557	0.133511	coin		26.8589	25.2552	22.203		24.7724	24.2816	coin		0.370006	0.296795	0.274426		0.313742	0.347622	coin
3	2.28937	1.63394	2.73367		2.21899	2.78087	after		4.01606	17.0341	10.8884		10.6462	17.5685	after		95.9839	82.9659	88.978		89.3093	81.9639	after		0	0	0.133601		0.0445337	0.467602	after		30.6818	31.9791	30.5556		31.0722	70.3049	after		0.253005	0.204541	0.454693		0.30408	0.99905	after
3	2.61031	2.8168	2.56365		2.66359	2.19069	after		3.67401	0.802139	3.07692		2.51769	2.46996	after		95.1904	98.9973	96.8562		97.0146	97.53	after		1.1356	0.200535	0.06689		0.467677	0	after		23.1074	23.5706	26.6966		24.4582	21.7656	after		0.229109	0.418504	0.375031		0.340881	0.241571	after
3	3.68764	1.85476	3.63748		3.05996	3.27065	after		4.47861	7.28123	5.40721		5.72235	1.1356	after		95.254	92.7188	93.1909		93.7212	97.328	after		0.26738	0	1.40187		0.556416	1.53641	after		33.5939	20.2793	31.5637		28.479	16.8614	after		0.991465	0.339628	0.905752		0.745615	0.078859	after
3	2.1793	2.0102	2.83125		2.34025	1.76011	after		30.9953	16.7557	11.9064		19.8858	15.5288	after		68.8711	82.9773	87.3579		79.7354	84.4712	after		0.133601	0.267023	0.735786		0.378803	0	after		35.1953	24.6216	63.2587		41.0252	21.2676	after		0.96612	0.324995	0.888779		0.726631	0.114371	after
3	2.68816	1.79053	3.64826		2.70898	0.189884	after		2.80749	10.0134	1.22034		4.68039	96.2343	after		97.1925	89.9866	98.3051		95.1614	3.76569	after		0	0	0.474576		0.158192	0	after		24.3371	24.743	31.9858		27.022	133.338	after		0.432867	0.343312	0.935604		0.570594	0.079359	after
3	2.52699	1.8885	1.67454		2.03001	1.8094	after		3.09491	6.20828	35.1369		14.8134	16.9469	after		96.9051	93.7917	64.6627		85.1198	82.4479	after		0	0	0.200401		0.0668003	0.605245	after		23.7983	23.0089	34.7446		27.1839	25.0754	after		0.341468	0.324995	0.166941		0.277801	0.137754	after
3	2.08443	2.7811	2.47442		2.44665	1.1404	after		10.5369	12.5585	3.87701		8.99079	47.5774	after		89.4631	87.3079	96.123		90.9647	52.4226	after		0	0.133601	0		0.0445337	0	after		30.7921	66.0885	23.4236		40.1014	29.7217	after		0.436942	0.99905	0.395318		0.610437	0.014127	after
3	2.23781	1.50797	2.78165		2.17581	1.98425	after		3.20427	23.0461	3.20427		9.81821	17.7689	after		96.7957	76.9539	96.5955		90.115	82.1643	after		0	0	0.200267		0.0667557	0.0668	after		24.2698	24.4254	37.2167		28.6373	37.737	after		0.254154	0.026988	0.145647		0.142263	0.666915	after
3	2.90747	2.09331	2.81052		2.60377	3.2604	after		4.00802	12.1576	5.61122		7.25896	12.5501	after		94.99	87.642	93.8544		92.1621	85.7143	after		1.002	0.200401	0.534402		0.578936	1.73565	after		23.5805	35.7637	33.886		31.0768	89.9876	after		0.417854	0.239864	0.513213		0.39031	1	after
3	3.94525	2.40933	2.59927		2.98462	4.70885	after		8.01068	4.14162	3.94649		5.36626	1.57729	after		90.6542	95.3908	96.0535		94.0328	92.9022	after		1.33511	0.467602	0		0.600905	5.5205	after		45.0373	20.3665	25.5608		30.3215	20.2759	after		1	0.291463	0.474833		0.588765	0.759643	after
3	2.22368	4.17175	3.72812		3.37452	1.62813	after		2.73698	3.80507	0		2.18069	34.8123	after		97.263	95.3271	99.2657		97.2853	65.1877	after		0	0.867824	0.734312		0.534045	0	after		24.336	44.6849	20.2231		29.748	23.4908	after		0.292646	0.980153	0.428281		0.567027	0.297389	after
3	2.92896	6.05754	3.74235		4.24295	1.81591	after		2.80374	1.2016	8.47797		4.1611	10.8812	after		97.1963	90.8545	90.3872		92.8126	88.9853	after		0	7.94393	1.13485		3.02626	0.133511	after		21.154	28.3816	40.703		30.0795	21.9937	after		0.475509	1	0.950358		0.808622	0.347622	after
4	2.85052	0.750959	2.7392		2.11356	0.573532	before		14.4675	78.6096	14.4957		35.8576	84.8262	before		85.2646	21.3904	85.1035		63.9195	15.1738	before		0.267917	0	0.400802		0.222906	0	before		41.7847	54.977	47.6586		48.1401	42.2953	before		0.972978	0.081125	0.877961		0.644021	0.066326	before
4	3.51042	0.704611	0.846125		1.68705	0.410459	before		9.27904	74.681	75.641		53.2004	89.7712	before		90.5207	25.319	24.359		46.7329	10.2288	before		0.200267	0	0		0.0667557	0	before		36.3108	41.7749	33.0923		37.0593	65.8322	before		1	0.092461	0.187805		0.426755	0.064805	before
4	3.78996	0.36028	0.835149		1.6618	0.692453	before		4.40977	91.1469	74.3779		56.6449	80.3071	before		95.1153	8.85312	25.6221		43.1968	19.6262	before		0.474898	0	0		0.158299	0.066756	before		31.1561	79.1085	28.1027		46.1224	43.1697	before		1	0.001449	0.383546		0.461665	0.12811	before
4	2.40903	0.695959	0.706069		1.27035	1.71766	before		12.3159	80.0669	80.0941		57.4923	33.7784	before		86.8139	19.9331	19.7041		42.1504	65.5541	before		0.870147	0	0.201748		0.357298	0.667557	before		37.4169	44.124	35.111		38.8839	43.6353	before		0.843777	0.154926	0.069709		0.356137	0.564525	before
4	3.85431	0.109241	0.621832		1.52846	1.99469	before		3.36022	99.5733	81.6313		61.5216	26.393	before		95.8333	0.426743	18.3687		38.2096	73.3138	before		0.806452	0	0		0.268817	0.293255	before		44.8805	156.921	37.3068		79.7028	34.251	before		1	0	0.25015		0.416717	0.91048	before
4	3.29922	0.338977	0.515325		1.38451	0.224594	before		6.35995	90.4277	86.0309		60.9395	95.8564	before		92.6928	9.5723	13.9691		38.7447	4.14365	before		0.947226	0	0		0.315742	0	before		72.3738	53.9225	52.5855		59.6273	92.237	before		0.985122	0.148982	0.121223		0.418442	0	before
4	2.89919	2.23344	5.23237		3.455	3.68333	coin		4.07482	15.5645	0		6.54643	2.13618	coin		95.5244	83.3667	95.7916		91.5609	97.4633	coin		0.400802	1.0688	4.20842		1.89267	0.400534	coin		20.9445	19.568	14.7466		18.4197	20.3645	coin		0.687516	0.165254	0.666868		0.506546	0.883996	coin
4	3.36596	2.27316	5.24247		3.6272	3.90424	coin		4.93992	8.75084	2.00401		5.23159	3.73832	coin		94.6595	90.9152	91.7168		92.4305	93.4579	coin		0.400534	0.334001	6.27923		2.33792	2.80374	coin		19.9244	24.6522	19.0582		21.2116	16.2135	coin		0.813745	0.451021	0.771959		0.678908	0.734342	coin
4	4.24311	2.2829	3.68865		3.40489	4.72225	coin		2.93725	5.94125	2.93921		3.93924	1.60321	coin		95.8611	93.9252	96.5932		95.4599	96.5932	coin		1.2016	0.133511	0.467602		0.600905	1.80361	coin		17.5562	19.9244	20.7824		19.421	23.6481	coin		0.941053	0.437153	0.731179		0.703128	0.759862	coin
4	3.13332	1.74064	3.23361		2.70253	4.22439	coin		9.23077	29.2503	2.00401		13.495	0.668003	coin		89.9666	70.7497	97.662		86.1261	98.0628	coin		0.802676	0	0.334001		0.378892	1.2692	coin		17.9342	25.1877	25.0387		22.7202	18.2498	coin		0.455671	0.429284	0.638241		0.507732	0.538348	coin
4	3.5632	3.48394	3.46948		3.50554	2.05999	coin		10.3957	3.81016	1.67001		5.29196	26.1364	coin		85.7814	95.7219	97.7288		93.0774	73.5294	coin		3.82294	0.467914	0.601202		1.63068	0.334225	coin		15.9734	31.8009	17.2429		21.6724	17.3594	coin		0.213545	0.638241	0.591139		0.480975	0.309286	coin
4	4.79583	2.57385	3.91076		3.76015	4.67255	coin		3.55705	14.0562	2.93725		6.85017	4.53939	coin		89.7987	84.9398	94.3258		89.6881	90.2537	coin		6.64429	1.00402	2.73698		3.46176	5.20694	coin		22.468	21.5512	18.4652		20.8281	17.6176	coin		0.576698	0.721726	0.344096		0.547507	0.597681	coin
4	2.99725	2.28577	3.4326		2.90521	3.73888	after		0	9.01202	3.34001		4.11734	4.40587	after		99.3311	90.988	96.0588		95.4593	94.5928	after		0.668896	0	0.601202		0.423366	1.00134	after		17.7702	23.5897	21.0177		20.7925	40.3432	after		0.396291	0.674485	0.788224		0.619667	0.968925	after
4	2.62545	2.32608	2.73615		2.56256	2.46901	after		4.34202	4.81283	5.14019		4.76501	7.94393	after		95.324	95.1872	94.7931		95.1014	91.6555	after		0.334001	0	0.066756		0.133586	0.400534	after		20.7794	20.7753	25.4037		22.3195	31.0382	after		0.455006	0.611578	0.750247		0.60561	0.407854	after
4	2.99593	2.61694	1.82791		2.48026	1.93073	after		2.27425	14.753	35.1171		17.3814	15.1272	after		97.1906	84.9132	64.3478		82.1506	84.8059	after		0.535117	0.333778	0.535117		0.468004	0.066934	after		18.2908	42.383	99.753		53.4756	17.2972	after		0.445723	0.583181	0.897871		0.642258	0.457003	after
4	4.57494	2.38554	3.73916		3.56655	2.06639	after		1.53641	9.01804	4.34202		4.96549	10.0936	after		96.7268	90.982	95.1236		94.2774	89.9064	after		1.73681	0	0.534402		0.75707	0	after		42.0069	17.9632	38.6971		32.8891	18.4359	after		1	0.542564	0.857424		0.799996	0.443081	after
4	1.94575	2.04739	3.83673		2.60996	1.29049	after		18.9993	6.01202	3.00601		9.33912	40.9365	after		81.0007	93.988	95.9252		90.3046	59.0635	after		0	0	1.0688		0.356268	0	after		19.8992	20.9494	25.6396		22.1627	29.3808	after		0.241488	0.544676	0.837127		0.541097	0.045179	after
4	1.75232	3.03668	2.5724		2.4538	1.33638	after		24.131	13.7032	15.02		17.6181	46.5955	after		75.8021	85.5615	84.7797		82.0478	53.4045	after		0.066845	0.735294	0.200267		0.334135	0	after		22.6818	35.4836	45.7343		34.6332	19.6971	after		0.31594	0.877803	0.809603		0.667782	0.230017	after
4	2.43944	2.41961	4.18276		3.01394	0.795922	after		10.8957	5.40721	5.81162		7.37152	70.301	after		89.1043	93.992	92.652		91.9161	29.699	after		0	0.600801	1.53641		0.712402	0	after		30.2867	23.4629	44.5256		32.7584	38.0322	after		0.717019	0.26062	1		0.659213	0.061261	after
4	3.2173	3.50625	2.30285		3.0088	2.72182	after		4.81283	6.88043	20.7081		10.8004	8.15508	after		94.7193	92.986	79.0915		88.9322	91.5107	after		0.467914	0.133601	0.200401		0.267305	0.334225	after		25.9013	33.3765	37.1771		32.1516	29.0174	after		0.781699	0.926837	0.61894		0.775825	0.807122	after
4	2.12618	2.34554	4.96498		3.14556	1.45613	after		4.60922	2.07081	6.15385		4.27796	35.1802	after		95.2572	97.9292	88.0936		93.76	64.8198	after		0.133601	0	5.75251		1.96204	0	after		21.1004	22.1506	38.8278		27.3596	24.1674	after		0.331176	0.441102	0.918009		0.563429	0.246103	after
4	3.36321	2.42248	2.40225		2.72931	2.20774	after		0	7.49164	10.2136		5.90175	19.1845	after		99.1984	92.3077	89.7864		93.7642	80.7487	after		0.801603	0.200669	0		0.334091	0.066845	after		16.5111	16.7625	25.5873		19.6203	17.4005	after		0.416908	0.324453	0.637495		0.459619	0.521464	after
4	1.68661	2.73776	4.31381		2.91273	1.92571	after		33.9357	2.87241	2.87818		13.2288	23.0461	after		66.0643	97.0608	94.913		86.0127	76.9539	after		0	0.0668	2.20884		0.758545	0	after		22.142	21.2724	39.6099		27.6748	15.901	after		0.166346	0.86083	0.956284		0.661153	0.42667	after
4	2.63039	2.20715	3.26251		2.70002	3.36159	after		3.40454	5.21042	8.41122		5.67539	3.53805	after		96.5955	94.7896	90.988		94.1243	94.4593	after		0	0	0.600801		0.200267	2.00267	after		21.1114	17.3728	32.8492		23.7778	27.9143	after		0.559539	0.518823	0.765497		0.61462	0.793954	after

## Sheet: t-test depended_sampl_data
Fish	Avg. swimming speed (cm/s)	control	events 31/08		Freezing time (%)	control	events 31/08		Swimming time (%)	control	events 31/08		Rapid movement time (%)	control	events 31/08		Meandering (°/cm)	control	events 31/08		"Walls/Inner area" ratio	control	events 31/08
1		3.20676	0.176059	before		37.8813	98.9011	before		58.8413	1.0989	before		3.27744	0	before		85.4353	157.611	before		0.640942	0	before
1		2.83541	0.275859	before		38.6575	95.7718	before		58.3533	4.22819	before		2.98919	0	before		64.9356	113.991	before		0.630681	0	before
1		2.64324	0.224979	before		32.3292	96.8478	before		65.9083	3.15225	before		1.7625	0	before		46.8547	109.151	before		0.638988	0	before
1		1.9982	0.393042	before		38.2293	91.5888	before		60.8145	8.21095	before		0.956206	0.200267	before		68.1617	71.8897	before		0.432519	0.339025	before
1		1.66685	0.236754	before		45.1503	98.0014	before		54.1559	1.99862	before		0.693803	0	before		57.64	107.299	before		0.395942	0	before
1		1.30318	0.770559	before		58.2707	80.6818	before		41.5653	18.7834	before		0.163969	0.534759	before		55.951	51.6183	before		0.69902	0.120684	before
1		2.97111	4.05939	coin		3.78513	0	coin		94.9891	98.7316	coin		1.22574	1.26836	coin		34.5462	26.8494	coin		0.513832	0.778479	coin
1		2.10201	4.56104	coin		23.0575	0.535117	coin		76.6531	97.7258	coin		0.289379	1.73913	coin		27.2454	34.358	coin		0.335546	0.98447	coin
1		2.684	2.93771	coin		8.42194	4.87316	coin		90.6869	94.259	coin		0.891162	0.867824	coin		33.9993	20.9194	coin		0.58359	0.458217	coin
1		2.41785	2.23194	coin		16.6842	17.4699	coin		82.6922	81.3253	coin		0.623588	1.20482	coin		34.9543	19.6636	coin		0.49092	0.408391	coin
1		2.55841	0.690709	coin		4.344	77.036	coin		95.2999	22.964	coin		0.356075	0	coin		29.3569	59.2494	coin		0.529085	0.516584	coin
1		2.1955	2.76191	coin		9.20078	4.27522	coin		90.3091	95.0568	coin		0.490151	0.668003	coin		33.6352	24.9558	coin		0.502299	0.561456	coin
1		1.95189	2.95755	after		13.8122	3.87183	after		85.9202	95.6609	after		0.267559	0.46729	after		26.8789	47.5048	after		0.541397	0.928049	after
1		2.5667	1.4974	after		19.818	18.3946	after		79.5356	81.6054	after		0.646361	0	after		45.2174	24.3793	after		0.719264	0.514512	after
1		2.29385	2.44234	after		11.9775	71.3014	after		87.5772	20.7534	after		0.445261	7.9452	after		45.896	19.2562	after		0.663712	0.027446	after
1		2.25506	1.78205	after		9.77618	59.012	after		89.9563	37.5834	after		0.267559	3.40454	after		31.7073	24.4047	after		0.50887	0.66568	after
1		2.80546	1.50161	after		8.89481	26.8097	after		90.7267	73.1233	after		0.378535	0.067024	after		37.3577	30.1221	after		0.648227	0.371422	after
1		2.11666	2.23514	after		13.5204	9.21938	after		86.1898	88.9637	after		0.289811	1.81696	after		36.6373	25.3814	after		0.571631	0.51866	after
1		1.99237	1.21101	after		9.56726	42.0455	after		90.1651	57.9545	after		0.267604	0	after		32.9606	24.5632	after		0.574849	0.282776	after
1		2.40629	2.26507	after		11.523	7.29585	after		87.8962	92.7041	after		0.580741	0	after		44.1049	22.3727	after		0.605242	0.312148	after
1		2.07694	1.85077	after		14.0875	22.6453	after		85.5117	77.2879	after		0.400802	0.0668	after		31.5553	24.487	after		0.467216	0.397462	after
1		1.51983	2.07007	after		33.5765	14.4674	after		66.067	85.5326	after		0.356506	0	after		30.7723	29.2813	after		0.3284	0.60468	after
1		1.49481	2.21684	after		25.9433	13.061	after		74.0344	86.2023	after		0.0222817	0.736772	after		33.4335	20.4631	after		0.348366	0.489168	after
1		1.12418	2.66753	after		50.4012	49.4043	after		49.5096	42.9573	after		0.0891563	7.6384	after		48.0069	20.8777	after		0.342563	0.195801	after
2		1.15535	0.597846	before		65.5232	84.5775	before		34.3415	15.0704	before		0.135339	0.352113	before		79.3092	51.2762	before		0.325712	0.092635	before
2		1.3356	1.30847	before		63.3434	52.8898	before		36.1212	46.8414	before		0.535475	0.268817	before		135.498	28.7174	before		0.343625	0.649951	before
2		1.40827	0.487676	before		63.2634	89.7017	before		36.4238	10.0142	before		0.312779	0.284091	before		75.7217	37.2609	before		0.356859	0.052293	before
2		1.35512	0.288189	before		59.747	94.8735	before		40.0055	5.12645	before		0.247527	0	before		59.1415	143.003	before		0.369337	0	before
2		0.887997	0.496526	before		73.7398	88.2641	before		26.0078	11.7359	before		0.252336	0	before		53.8644	42.5571	before		0.198974	0.052293	before
2		0.685312	0.930512	before		83.6562	77.5387	before		15.9168	21.6543	before		0.426992	0.806994	before		55.4284	44.4165	before		0.133562	0.25054	before
2		3.33363	2.06566	coin		11.4848	26.4352	coin		86.6547	73.498	coin		1.86049	0.066756	coin		27.3334	20.541	coin		0.576423	0.44425	coin
2		2.66195	2.84649	coin		10.2737	5.48495	coin		88.1449	94.3144	coin		1.58148	0.200669	coin		28.5755	17.0474	coin		0.56815	0.548713	coin
2		2.79629	2.39761	coin		19.7332	18.9586	coin		79.2654	81.0414	coin		1.00137	0	coin		29.1017	23.638	coin		0.412119	0.48914	coin
2		2.56258	1.94056	coin		14.5834	25.2005	coin		84.5704	74.7995	coin		0.846202	0	coin		41.4707	28.6386	coin		0.527593	0.399988	coin
2		2.29379	2.2971	coin		11.0178	66.0881	coin		88.8485	33.0441	coin		0.13369	0.867824	coin		24.7365	31.0131	coin		0.513817	0.498002	coin
2		2.29222	1.56501	coin		9.95062	47.1257	coin		87.8464	52.8743	coin		2.20294	0	coin		21.8843	22.1037	coin		0.436005	0.239562	coin
2		2.38975	0.77073	after		26.3059	72.2296	after		73.0684	27.7704	after		0.625679	0	after		28.9262	40.0667	after		0.412656	0.127809	after
2		1.84352	3.69426	after		25.2927	13.1597	after		74.4399	86.1723	after		0.26738	0.668003	after		27.3271	41.7986	after		0.270279	0.791018	after
2		1.9122	0.94561	after		34.5845	66.1323	after		65.3481	33.8677	after		0.06734	0	after		36.6152	43.8264	after		0.403439	0.13367	after
2		1.82609	0.06874	after		33.4381	100	after		66.5397	0	after		0.0222667	0	after		31.9417	172.382	after		0.333586	0	after
2		2.54443	1.45204	after		32.0316	44.4595	after		67.7898	55.5405	after		0.178614	0	after		43.8023	30.1278	after		0.587908	0.50829	after
2		0.764104	1.41284	after		73.813	52.7815	after		26.187	46.8792	after		0	0.339213	after		53.5214	25.335	after		0.24501	0.146546	after
2		2.06755	1.53776	after		31.2154	44.8529	after		68.6955	55.0802	after		0.089067	0.066845	after		37.0783	24.6497	after		0.374965	0.294704	after
2		1.56006	1.35841	after		43.1194	38.3534	after		56.6136	61.6466	after		0.267037	0	after		32.3066	28.0418	after		0.212274	0.407707	after
2		1.95085	3.93848	after		32.8516	5.61122	after		67.1038	93.0528	after		0.044593	1.33601	after		25.0646	33.1054	after		0.315383	0.74585	after
2		2.43248	2.55092	after		28.5968	14.9733	after		71.1805	84.1578	after		0.222742	0.868984	after		30.682	23.0365	after		0.482556	0.482016	after
2		1.56239	4.51627	after		37.2688	3.40454	after		62.7089	94.7263	after		0.0222667	1.86916	after		32.3807	36.051	after		0.207765	0.932285	after
2		1.43229	1.72671	after		45.8397	35.8528	after		54.1157	63.4114	after		0.0445933	0.735786	after		28.6176	26.2447	after		0.192751	0.351379	after
3		0.647143	0.178492	before		80.5187	100	before		19.4367	0	before		0.044593	0	before		59.2463	122.15	before		0.263289	0	before
3		0.487005	0.813685	before		88.4569	76.0108	before		11.5431	23.9892	before		0	0	before		78.5484	37.6381	before		0.455056	0.145119	before
3		1.06205	0.195721	before		71.5923	97.6335	before		27.7836	2.36646	before		0.624126	0	before		51.2997	99.4822	before		0.213761	0.441309	before
3		0.959044	0.768186	before		71.1832	82.2386	before		28.6827	17.2922	before		0.134112	0.469169	before		38.9563	38.2601	before		0.415525	0.446054	before
3		0.700413	0.989983	before		80.972	75.4339	before		19.028	23.8985	before		0	0.667557	before		51.9602	32.5925	before		0.236275	0.725082	before
3		0.794445	0.91622	before		76.7163	72.7395	before		23.2165	27.2605	before		0.0671443	0	before		46.5112	37.1351	before		0.229114	0.28321	before
3		5.00012	4.73053	coin		2.23449	0.46729	coin		89.1114	98.2644	coin		8.65414	1.26836	coin		31.6105	27.0973	coin		0.648381	0.95683	coin
3		4.10839	3.78594	coin		2.62853	0.534045	coin		94.2077	98.7316	coin		3.16372	0.734312	coin		34.721	21.0715	coin		0.822375	0.285563	coin
3		3.7457	1.85744	coin		6.12038	29.9866	coin		92.3213	69.8126	coin		1.55827	0.200803	coin		46.6516	32.2345	coin		0.83403	0.478218	coin
3		2.01132	2.20917	coin		40.0314	5.61122	coin		59.5903	94.3888	coin		0.378312	0	coin		92.6493	22.0104	coin		0.421408	0.283798	coin
3		3.43235	1.54571	coin		2.87143	29.9197	coin		95.5703	70.0803	coin		1.55824	0	coin		28.4663	25.1778	coin		0.522871	0.043383	coin
3		2.66451	2.6389	coin		4.94096	3.53805	coin		94.5915	96.3284	coin		0.467557	0.133511	coin		24.7724	24.2816	coin		0.313742	0.347622	coin
3		2.21899	2.78087	after		10.6462	17.5685	after		89.3093	81.9639	after		0.0445337	0.467602	after		31.0722	70.3049	after		0.30408	0.99905	after
3		2.66359	2.19069	after		2.51769	2.46996	after		97.0146	97.53	after		0.467677	0	after		24.4582	21.7656	after		0.340881	0.241571	after
3		3.05996	3.27065	after		5.72235	1.1356	after		93.7212	97.328	after		0.556416	1.53641	after		28.479	16.8614	after		0.745615	0.078859	after
3		2.34025	1.76011	after		19.8858	15.5288	after		79.7354	84.4712	after		0.378803	0	after		41.0252	21.2676	after		0.726631	0.114371	after
3		2.70898	0.189884	after		4.68039	96.2343	after		95.1614	3.76569	after		0.158192	0	after		27.022	133.338	after		0.570594	0.079359	after
3		2.03001	1.8094	after		14.8134	16.9469	after		85.1198	82.4479	after		0.0668003	0.605245	after		27.1839	25.0754	after		0.277801	0.137754	after
3		2.44665	1.1404	after		8.99079	47.5774	after		90.9647	52.4226	after		0.0445337	0	after		40.1014	29.7217	after		0.610437	0.014127	after
3		2.17581	1.98425	after		9.81821	17.7689	after		90.115	82.1643	after		0.0667557	0.0668	after		28.6373	37.737	after		0.142263	0.666915	after
3		2.60377	3.2604	after		7.25896	12.5501	after		92.1621	85.7143	after		0.578936	1.73565	after		31.0768	89.9876	after		0.39031	1	after
3		2.98462	4.70885	after		5.36626	1.57729	after		94.0328	92.9022	after		0.600905	5.5205	after		30.3215	20.2759	after		0.588765	0.759643	after
3		3.37452	1.62813	after		2.18069	34.8123	after		97.2853	65.1877	after		0.534045	0	after		29.748	23.4908	after		0.567027	0.297389	after
3		4.24295	1.81591	after		4.1611	10.8812	after		92.8126	88.9853	after		3.02626	0.133511	after		30.0795	21.9937	after		0.808622	0.347622	after
4		2.11356	0.573532	before		35.8576	84.8262	before		63.9195	15.1738	before		0.222906	0	before		48.1401	42.2953	before		0.644021	0.066326	before
4		1.68705	0.410459	before		53.2004	89.7712	before		46.7329	10.2288	before		0.0667557	0	before		37.0593	65.8322	before		0.426755	0.064805	before
4		1.6618	0.692453	before		56.6449	80.3071	before		43.1968	19.6262	before		0.158299	0.066756	before		46.1224	43.1697	before		0.461665	0.12811	before
4		1.27035	1.71766	before		57.4923	33.7784	before		42.1504	65.5541	before		0.357298	0.667557	before		38.8839	43.6353	before		0.356137	0.564525	before
4		1.52846	1.99469	before		61.5216	26.393	before		38.2096	73.3138	before		0.268817	0.293255	before		79.7028	34.251	before		0.416717	0.91048	before
4		1.38451	0.224594	before		60.9395	95.8564	before		38.7447	4.14365	before		0.315742	0	before		59.6273	92.237	before		0.418442	0	before
4		3.455	3.68333	coin		6.54643	2.13618	coin		91.5609	97.4633	coin		1.89267	0.400534	coin		18.4197	20.3645	coin		0.506546	0.883996	coin
4		3.6272	3.90424	coin		5.23159	3.73832	coin		92.4305	93.4579	coin		2.33792	2.80374	coin		21.2116	16.2135	coin		0.678908	0.734342	coin
4		3.40489	4.72225	coin		3.93924	1.60321	coin		95.4599	96.5932	coin		0.600905	1.80361	coin		19.421	23.6481	coin		0.703128	0.759862	coin
4		2.70253	4.22439	coin		13.495	0.668003	coin		86.1261	98.0628	coin		0.378892	1.2692	coin		22.7202	18.2498	coin		0.507732	0.538348	coin
4		3.50554	2.05999	coin		5.29196	26.1364	coin		93.0774	73.5294	coin		1.63068	0.334225	coin		21.6724	17.3594	coin		0.480975	0.309286	coin
4		3.76015	4.67255	coin		6.85017	4.53939	coin		89.6881	90.2537	coin		3.46176	5.20694	coin		20.8281	17.6176	coin		0.547507	0.597681	coin
4		2.90521	3.73888	after		4.11734	4.40587	after		95.4593	94.5928	after		0.423366	1.00134	after		20.7925	40.3432	after		0.619667	0.968925	after
4		2.56256	2.46901	after		4.76501	7.94393	after		95.1014	91.6555	after		0.133586	0.400534	after		22.3195	31.0382	after		0.60561	0.407854	after
4		2.48026	1.93073	after		17.3814	15.1272	after		82.1506	84.8059	after		0.468004	0.066934	after		53.4756	17.2972	after		0.642258	0.457003	after
4		3.56655	2.06639	after		4.96549	10.0936	after		94.2774	89.9064	after		0.75707	0	after		32.8891	18.4359	after		0.799996	0.443081	after
4		2.60996	1.29049	after		9.33912	40.9365	after		90.3046	59.0635	after		0.356268	0	after		22.1627	29.3808	after		0.541097	0.045179	after
4		2.4538	1.33638	after		17.6181	46.5955	after		82.0478	53.4045	after		0.334135	0	after		34.6332	19.6971	after		0.667782	0.230017	after
4		3.01394	0.795922	after		7.37152	70.301	after		91.9161	29.699	after		0.712402	0	after		32.7584	38.0322	after		0.659213	0.061261	after
4		3.0088	2.72182	after		10.8004	8.15508	after		88.9322	91.5107	after		0.267305	0.334225	after		32.1516	29.0174	after		0.775825	0.807122	after
4		3.14556	1.45613	after		4.27796	35.1802	after		93.76	64.8198	after		1.96204	0	after		27.3596	24.1674	after		0.563429	0.246103	after
4		2.72931	2.20774	after		5.90175	19.1845	after		93.7642	80.7487	after		0.334091	0.066845	after		19.6203	17.4005	after		0.459619	0.521464	after
4		2.91273	1.92571	after		13.2288	23.0461	after		86.0127	76.9539	after		0.758545	0	after		27.6748	15.901	after		0.661153	0.42667	after
4		2.70002	3.36159	after		5.67539	3.53805	after		94.1243	94.4593	after		0.200267	2.00267	after		23.7778	27.9143	after		0.61462	0.793954	after
means (event "after")
fish#1		2.05034	2.05811			18.5748	28.1273			81.0908	70.0274			0.334348	1.84525			37.044	26.0911			0.526645	0.442317
fish#2		1.85714	1.99773			37.0298	40.9842			62.8159	58.5254			0.154298	0.490333			34.022	43.7222			0.336548	0.410106
fish#3		2.73751	2.21163			8.00348	22.9209			91.4529	76.2403			0.543655	0.83881			30.7671	42.6517			0.506086	0.394722
fish#4		2.84072	2.1084			8.78686	23.709			90.6542	75.9683			0.558923	0.322712			29.1346	25.7188			0.634189	0.450719
means (event "before")
fish#1		2.27561	0.346209			41.753	93.6321			56.6064	6.24539			1.64052	0.122504			63.163	101.927			0.573015	0.0766182
fish#2		1.13794	0.684869			68.2122	81.3075			31.4694	18.4071			0.318408	0.285336			76.4938	57.8718			0.288011	0.182952
fish#3		0.775017	0.643714			78.2399	84.0094			21.6151	15.8012			0.144996	0.189454			54.4204	61.2096			0.30217	0.340129
fish#4		1.60762	0.935566			54.276	68.4887			45.4923	31.34			0.231636	0.171261			51.5893	53.5701			0.453956	0.289041
means (event "coin")
fish#1		2.48815	2.87378			10.9156	17.3649			88.4384	81.6771			0.646017	0.958022			32.2896	30.9993			0.492545	0.617933
fish#2		2.65674	2.18541			12.8406	31.5489			85.8884	68.2619			1.27103	0.189208			28.8503	23.8303			0.505684	0.436609
fish#3		3.49373	2.79461			9.80453	11.6761			87.5654	87.9344			2.63004	0.389497			43.1452	25.3122			0.593801	0.399236
fish#4		3.40922	3.87779			6.8924	6.47024			91.3905	91.56			1.71714	1.96971			20.7122	18.9088			0.570799	0.637253

## Sheet: groups
Fish	Avg. swimming speed (cm/s)	control	events 31/08		Freezing time (%)	control	events 31/08		Swimming time (%)	control	events 31/08		Rapid movement time (%)	control	events 31/08		Meandering (°/cm)	control	events 31/08		"Walls/Inner area" ratio	control	events 31/08
1		3.20676	0.176059	before		37.8813	98.9011	before		58.8413	1.0989	before		3.27744	0	before		85.4353	157.611	before		0.640942	0	before
1		2.83541	0.275859	before		38.6575	95.7718	before		58.3533	4.22819	before		2.98919	0	before		64.9356	113.991	before		0.630681	0	before
1		2.64324	0.224979	before		32.3292	96.8478	before		65.9083	3.15225	before		1.7625	0	before		46.8547	109.151	before		0.638988	0	before
1		1.9982	0.393042	before		38.2293	91.5888	before		60.8145	8.21095	before		0.956206	0.200267	before		68.1617	71.8897	before		0.432519	0.339025	before
1		1.66685	0.236754	before		45.1503	98.0014	before		54.1559	1.99862	before		0.693803	0	before		57.64	107.299	before		0.395942	0	before
1		1.30318	0.770559	before		58.2707	80.6818	before		41.5653	18.7834	before		0.163969	0.534759	before		55.951	51.6183	before		0.69902	0.120684	before
2		1.15535	0.597846	before		65.5232	84.5775	before		34.3415	15.0704	before		0.135339	0.352113	before		79.3092	51.2762	before		0.325712	0.092635	before
2		1.3356	1.30847	before		63.3434	52.8898	before		36.1212	46.8414	before		0.535475	0.268817	before		135.498	28.7174	before		0.343625	0.649951	before
2		1.40827	0.487676	before		63.2634	89.7017	before		36.4238	10.0142	before		0.312779	0.284091	before		75.7217	37.2609	before		0.356859	0.052293	before
2		1.35512	0.288189	before		59.747	94.8735	before		40.0055	5.12645	before		0.247527	0	before		59.1415	143.003	before		0.369337	0	before
2		0.887997	0.496526	before		73.7398	88.2641	before		26.0078	11.7359	before		0.252336	0	before		53.8644	42.5571	before		0.198974	0.052293	before
2		0.685312	0.930512	before		83.6562	77.5387	before		15.9168	21.6543	before		0.426992	0.806994	before		55.4284	44.4165	before		0.133562	0.25054	before
3		0.647143	0.178492	before		80.5187	100	before		19.4367	0	before		0.044593	0	before		59.2463	122.15	before		0.263289	0	before
3		0.487005	0.813685	before		88.4569	76.0108	before		11.5431	23.9892	before		0	0	before		78.5484	37.6381	before		0.455056	0.145119	before
3		1.06205	0.195721	before		71.5923	97.6335	before		27.7836	2.36646	before		0.624126	0	before		51.2997	99.4822	before		0.213761	0.441309	before
3		0.959044	0.768186	before		71.1832	82.2386	before		28.6827	17.2922	before		0.134112	0.469169	before		38.9563	38.2601	before		0.415525	0.446054	before
3		0.700413	0.989983	before		80.972	75.4339	before		19.028	23.8985	before		0	0.667557	before		51.9602	32.5925	before		0.236275	0.725082	before
3		0.794445	0.91622	before		76.7163	72.7395	before		23.2165	27.2605	before		0.0671443	0	before		46.5112	37.1351	before		0.229114	0.28321	before
4		2.11356	0.573532	before		35.8576	84.8262	before		63.9195	15.1738	before		0.222906	0	before		48.1401	42.2953	before		0.644021	0.066326	before
4		1.68705	0.410459	before		53.2004	89.7712	before		46.7329	10.2288	before		0.0667557	0	before		37.0593	65.8322	before		0.426755	0.064805	before
4		1.6618	0.692453	before		56.6449	80.3071	before		43.1968	19.6262	before		0.158299	0.066756	before		46.1224	43.1697	before		0.461665	0.12811	before
4		1.27035	1.71766	before		57.4923	33.7784	before		42.1504	65.5541	before		0.357298	0.667557	before		38.8839	43.6353	before		0.356137	0.564525	before
4		1.52846	1.99469	before		61.5216	26.393	before		38.2096	73.3138	before		0.268817	0.293255	before		79.7028	34.251	before		0.416717	0.91048	before
4		1.38451	0.224594	before		60.9395	95.8564	before		38.7447	4.14365	before		0.315742	0	before		59.6273	92.237	before		0.418442	0	before
1		2.97111	4.05939	coin		3.78513	0	coin		94.9891	98.7316	coin		1.22574	1.26836	coin		34.5462	26.8494	coin		0.513832	0.778479	coin
1		2.10201	4.56104	coin		23.0575	0.535117	coin		76.6531	97.7258	coin		0.289379	1.73913	coin		27.2454	34.358	coin		0.335546	0.98447	coin
1		2.684	2.93771	coin		8.42194	4.87316	coin		90.6869	94.259	coin		0.891162	0.867824	coin		33.9993	20.9194	coin		0.58359	0.458217	coin
1		2.41785	2.23194	coin		16.6842	17.4699	coin		82.6922	81.3253	coin		0.623588	1.20482	coin		34.9543	19.6636	coin		0.49092	0.408391	coin
1		2.55841	0.690709	coin		4.344	77.036	coin		95.2999	22.964	coin		0.356075	0	coin		29.3569	59.2494	coin		0.529085	0.516584	coin
1		2.1955	2.76191	coin		9.20078	4.27522	coin		90.3091	95.0568	coin		0.490151	0.668003	coin		33.6352	24.9558	coin		0.502299	0.561456	coin
2		3.33363	2.06566	coin		11.4848	26.4352	coin		86.6547	73.498	coin		1.86049	0.066756	coin		27.3334	20.541	coin		0.576423	0.44425	coin
2		2.66195	2.84649	coin		10.2737	5.48495	coin		88.1449	94.3144	coin		1.58148	0.200669	coin		28.5755	17.0474	coin		0.56815	0.548713	coin
2		2.79629	2.39761	coin		19.7332	18.9586	coin		79.2654	81.0414	coin		1.00137	0	coin		29.1017	23.638	coin		0.412119	0.48914	coin
2		2.56258	1.94056	coin		14.5834	25.2005	coin		84.5704	74.7995	coin		0.846202	0	coin		41.4707	28.6386	coin		0.527593	0.399988	coin
2		2.29379	2.2971	coin		11.0178	66.0881	coin		88.8485	33.0441	coin		0.13369	0.867824	coin		24.7365	31.0131	coin		0.513817	0.498002	coin
2		2.29222	1.56501	coin		9.95062	47.1257	coin		87.8464	52.8743	coin		2.20294	0	coin		21.8843	22.1037	coin		0.436005	0.239562	coin
3		5.00012	4.73053	coin		2.23449	0.46729	coin		89.1114	98.2644	coin		8.65414	1.26836	coin		31.6105	27.0973	coin		0.648381	0.95683	coin
3		4.10839	3.78594	coin		2.62853	0.534045	coin		94.2077	98.7316	coin		3.16372	0.734312	coin		34.721	21.0715	coin		0.822375	0.285563	coin
3		3.7457	1.85744	coin		6.12038	29.9866	coin		92.3213	69.8126	coin		1.55827	0.200803	coin		46.6516	32.2345	coin		0.83403	0.478218	coin
3		2.01132	2.20917	coin		40.0314	5.61122	coin		59.5903	94.3888	coin		0.378312	0	coin		92.6493	22.0104	coin		0.421408	0.283798	coin
3		3.43235	1.54571	coin		2.87143	29.9197	coin		95.5703	70.0803	coin		1.55824	0	coin		28.4663	25.1778	coin		0.522871	0.043383	coin
3		2.66451	2.6389	coin		4.94096	3.53805	coin		94.5915	96.3284	coin		0.467557	0.133511	coin		24.7724	24.2816	coin		0.313742	0.347622	coin
4		3.455	3.68333	coin		6.54643	2.13618	coin		91.5609	97.4633	coin		1.89267	0.400534	coin		18.4197	20.3645	coin		0.506546	0.883996	coin
4		3.6272	3.90424	coin		5.23159	3.73832	coin		92.4305	93.4579	coin		2.33792	2.80374	coin		21.2116	16.2135	coin		0.678908	0.734342	coin
4		3.40489	4.72225	coin		3.93924	1.60321	coin		95.4599	96.5932	coin		0.600905	1.80361	coin		19.421	23.6481	coin		0.703128	0.759862	coin
4		2.70253	4.22439	coin		13.495	0.668003	coin		86.1261	98.0628	coin		0.378892	1.2692	coin		22.7202	18.2498	coin		0.507732	0.538348	coin
4		3.50554	2.05999	coin		5.29196	26.1364	coin		93.0774	73.5294	coin		1.63068	0.334225	coin		21.6724	17.3594	coin		0.480975	0.309286	coin
4		3.76015	4.67255	coin		6.85017	4.53939	coin		89.6881	90.2537	coin		3.46176	5.20694	coin		20.8281	17.6176	coin		0.547507	0.597681	coin
1		1.95189	2.95755	after		13.8122	3.87183	after		85.9202	95.6609	after		0.267559	0.46729	after		26.8789	47.5048	after		0.541397	0.928049	after
1		2.5667	1.4974	after		19.818	18.3946	after		79.5356	81.6054	after		0.646361	0	after		45.2174	24.3793	after		0.719264	0.514512	after
1		2.29385	2.44234	after		11.9775	71.3014	after		87.5772	20.7534	after		0.445261	7.9452	after		45.896	19.2562	after		0.663712	0.027446	after
1		2.25506	1.78205	after		9.77618	59.012	after		89.9563	37.5834	after		0.267559	3.40454	after		31.7073	24.4047	after		0.50887	0.66568	after
1		2.80546	1.50161	after		8.89481	26.8097	after		90.7267	73.1233	after		0.378535	0.067024	after		37.3577	30.1221	after		0.648227	0.371422	after
1		2.11666	2.23514	after		13.5204	9.21938	after		86.1898	88.9637	after		0.289811	1.81696	after		36.6373	25.3814	after		0.571631	0.51866	after
1		1.99237	1.21101	after		9.56726	42.0455	after		90.1651	57.9545	after		0.267604	0	after		32.9606	24.5632	after		0.574849	0.282776	after
1		2.40629	2.26507	after		11.523	7.29585	after		87.8962	92.7041	after		0.580741	0	after		44.1049	22.3727	after		0.605242	0.312148	after
1		2.07694	1.85077	after		14.0875	22.6453	after		85.5117	77.2879	after		0.400802	0.0668	after		31.5553	24.487	after		0.467216	0.397462	after
1		1.51983	2.07007	after		33.5765	14.4674	after		66.067	85.5326	after		0.356506	0	after		30.7723	29.2813	after		0.3284	0.60468	after
1		1.49481	2.21684	after		25.9433	13.061	after		74.0344	86.2023	after		0.0222817	0.736772	after		33.4335	20.4631	after		0.348366	0.489168	after
1		1.12418	2.66753	after		50.4012	49.4043	after		49.5096	42.9573	after		0.0891563	7.6384	after		48.0069	20.8777	after		0.342563	0.195801	after
2		2.38975	0.77073	after		26.3059	72.2296	after		73.0684	27.7704	after		0.625679	0	after		28.9262	40.0667	after		0.412656	0.127809	after
2		1.84352	3.69426	after		25.2927	13.1597	after		74.4399	86.1723	after		0.26738	0.668003	after		27.3271	41.7986	after		0.270279	0.791018	after
2		1.9122	0.94561	after		34.5845	66.1323	after		65.3481	33.8677	after		0.06734	0	after		36.6152	43.8264	after		0.403439	0.13367	after
2		1.82609	0.06874	after		33.4381	100	after		66.5397	0	after		0.0222667	0	after		31.9417	172.382	after		0.333586	0	after
2		2.54443	1.45204	after		32.0316	44.4595	after		67.7898	55.5405	after		0.178614	0	after		43.8023	30.1278	after		0.587908	0.50829	after
2		0.764104	1.41284	after		73.813	52.7815	after		26.187	46.8792	after		0	0.339213	after		53.5214	25.335	after		0.24501	0.146546	after
2		2.06755	1.53776	after		31.2154	44.8529	after		68.6955	55.0802	after		0.089067	0.066845	after		37.0783	24.6497	after		0.374965	0.294704	after
2		1.56006	1.35841	after		43.1194	38.3534	after		56.6136	61.6466	after		0.267037	0	after		32.3066	28.0418	after		0.212274	0.407707	after
2		1.95085	3.93848	after		32.8516	5.61122	after		67.1038	93.0528	after		0.044593	1.33601	after		25.0646	33.1054	after		0.315383	0.74585	after
2		2.43248	2.55092	after		28.5968	14.9733	after		71.1805	84.1578	after		0.222742	0.868984	after		30.682	23.0365	after		0.482556	0.482016	after
2		1.56239	4.51627	after		37.2688	3.40454	after		62.7089	94.7263	after		0.0222667	1.86916	after		32.3807	36.051	after		0.207765	0.932285	after
2		1.43229	1.72671	after		45.8397	35.8528	after		54.1157	63.4114	after		0.0445933	0.735786	after		28.6176	26.2447	after		0.192751	0.351379	after
3		2.21899	2.78087	after		10.6462	17.5685	after		89.3093	81.9639	after		0.0445337	0.467602	after		31.0722	70.3049	after		0.30408	0.99905	after
3		2.66359	2.19069	after		2.51769	2.46996	after		97.0146	97.53	after		0.467677	0	after		24.4582	21.7656	after		0.340881	0.241571	after
3		3.05996	3.27065	after		5.72235	1.1356	after		93.7212	97.328	after		0.556416	1.53641	after		28.479	16.8614	after		0.745615	0.078859	after
3		2.34025	1.76011	after		19.8858	15.5288	after		79.7354	84.4712	after		0.378803	0	after		41.0252	21.2676	after		0.726631	0.114371	after
3		2.70898	0.189884	after		4.68039	96.2343	after		95.1614	3.76569	after		0.158192	0	after		27.022	133.338	after		0.570594	0.079359	after
3		2.03001	1.8094	after		14.8134	16.9469	after		85.1198	82.4479	after		0.0668003	0.605245	after		27.1839	25.0754	after		0.277801	0.137754	after
3		2.44665	1.1404	after		8.99079	47.5774	after		90.9647	52.4226	after		0.0445337	0	after		40.1014	29.7217	after		0.610437	0.014127	after
3		2.17581	1.98425	after		9.81821	17.7689	after		90.115	82.1643	after		0.0667557	0.0668	after		28.6373	37.737	after		0.142263	0.666915	after
3		2.60377	3.2604	after		7.25896	12.5501	after		92.1621	85.7143	after		0.578936	1.73565	after		31.0768	89.9876	after		0.39031	1	after
3		2.98462	4.70885	after		5.36626	1.57729	after		94.0328	92.9022	after		0.600905	5.5205	after		30.3215	20.2759	after		0.588765	0.759643	after
3		3.37452	1.62813	after		2.18069	34.8123	after		97.2853	65.1877	after		0.534045	0	after		29.748	23.4908	after		0.567027	0.297389	after
3		4.24295	1.81591	after		4.1611	10.8812	after		92.8126	88.9853	after		3.02626	0.133511	after		30.0795	21.9937	after		0.808622	0.347622	after
4		2.90521	3.73888	after		4.11734	4.40587	after		95.4593	94.5928	after		0.423366	1.00134	after		20.7925	40.3432	after		0.619667	0.968925	after
4		2.56256	2.46901	after		4.76501	7.94393	after		95.1014	91.6555	after		0.133586	0.400534	after		22.3195	31.0382	after		0.60561	0.407854	after
4		2.48026	1.93073	after		17.3814	15.1272	after		82.1506	84.8059	after		0.468004	0.066934	after		53.4756	17.2972	after		0.642258	0.457003	after
4		3.56655	2.06639	after		4.96549	10.0936	after		94.2774	89.9064	after		0.75707	0	after		32.8891	18.4359	after		0.799996	0.443081	after
4		2.60996	1.29049	after		9.33912	40.9365	after		90.3046	59.0635	after		0.356268	0	after		22.1627	29.3808	after		0.541097	0.045179	after
4		2.4538	1.33638	after		17.6181	46.5955	after		82.0478	53.4045	after		0.334135	0	after		34.6332	19.6971	after		0.667782	0.230017	after
4		3.01394	0.795922	after		7.37152	70.301	after		91.9161	29.699	after		0.712402	0	after		32.7584	38.0322	after		0.659213	0.061261	after
4		3.0088	2.72182	after		10.8004	8.15508	after		88.9322	91.5107	after		0.267305	0.334225	after		32.1516	29.0174	after		0.775825	0.807122	after
4		3.14556	1.45613	after		4.27796	35.1802	after		93.76	64.8198	after		1.96204	0	after		27.3596	24.1674	after		0.563429	0.246103	after
4		2.72931	2.20774	after		5.90175	19.1845	after		93.7642	80.7487	after		0.334091	0.066845	after		19.6203	17.4005	after		0.459619	0.521464	after
4		2.91273	1.92571	after		13.2288	23.0461	after		86.0127	76.9539	after		0.758545	0	after		27.6748	15.901	after		0.661153	0.42667	after
4		2.70002	3.36159	after		5.67539	3.53805	after		94.1243	94.4593	after		0.200267	2.00267	after		23.7778	27.9143	after		0.61462	0.793954	after
