# Supplementary material for: Influence of Geomagnetic Disturbances at Different Times of Day on Locomotor Activity in Zebrafish (Danio Rerio)
Source: Clocks Sleep. 2021 Nov 29;3(4):624–32. doi: 10.3390/clockssleep3040045 (PMC8700499; doi:10.3390/clockssleep3040045)
Supplement: Supplementary file 1 [file clockssleep-03-00045-s001.zip › Suppl(31_07-04_08).xlsx]

## Sheet: initial_data
Fish	Time	24(light-dark)	k>4	Avg. swimming speed (cm/s)	Freezing time (%)	Swimming time (%)	Rapid movement time (%)	Meandering (°/cm)	"Walls/Inner area" ratio
1	2020-07-31 12:15:00	L	contr	4.41861	2.14047	95.1171	2.74248	35.5367	0.717943
1	2020-07-31 12:45:00	L	contr	4.0306	6.54206	90.7877	2.67023	47.8154	0.959013
1	2020-07-31 13:14:59	L	contr	5.50144	4.14438	85.8289	10.0267	52.222	0.996319
1	2020-07-31 13:45:00	L	contr	3.24398	10.8812	87.1162	2.00267	64.1637	0.962733
1	2020-07-31 14:15:00	L	contr	4.23881	1.73565	95.3271	2.93725	32.0857	0.795707
1	2020-07-31 14:44:59	L	contr	3.60116	8.29847	90.5858	1.11576	48.1102	0.806409
1	2020-07-31 15:15:00	L	contr	3.6872	2.01072	96.8499	1.13941	30.0246	0.846847
1	2020-07-31 15:45:00	L	contr	4.32474	5.24166	91.8993	2.85909	35.5864	0.774392
1	2020-07-31 16:14:59	L	contr	3.69511	12.0321	86.4973	1.47059	34.072	0.742409
1	2020-07-31 16:45:00	L	contr	4.40695	5.48495	92.2408	2.27425	38.0232	1
1	2020-07-31 17:15:00	L	contr	4.54113	5.67423	90.721	3.60481	42.1842	0.826332
1	2020-07-31 17:44:59	L	contr	4.66467	5.03018	89.5372	5.4326	42.8264	0.823155
1	2020-08-01 12:15:00	L	contr	3.30062	15.1535	82.777	2.06943	66.3306	0.987148
1	2020-08-01 12:45:00	L	contr	3.79038	4.35365	94.7086	0.937709	46.3996	0.992625
1	2020-08-01 13:14:59	L	contr	3.1082	17.8905	81.1749	0.934579	43.5794	0.868597
1	2020-08-01 13:45:00	L	contr	4.69125	6.07477	88.9186	5.00668	31.9229	0.793248
1	2020-08-01 14:15:00	L	contr	1.84321	21.1615	78.7717	0.066756	42.4851	0.540628
1	2020-08-01 14:44:59	L	contr	2.65939	9.08484	90.4476	0.467602	53.3214	0.987148
1	2020-08-01 15:15:00	L	contr	4.04653	8.34446	86.6489	5.00668	44.6111	0.780192
1	2020-08-01 15:45:00	L	contr	3.97956	7.00935	91.6555	1.33511	35.4514	0.884931
1	2020-08-01 16:14:59	L	contr	2.77482	23.489	75.3434	1.16758	40.1611	0.765936
1	2020-08-01 16:45:00	L	contr	3.17699	14.3621	84.0347	1.60321	39.1598	0.720296
1	2020-08-01 17:15:00	L	contr	4.68947	11.0814	81.1081	7.81041	56.4983	0.868597
1	2020-08-01 17:44:59	L	contr	3.19715	13.1597	85.7047	1.1356	50.0644	0.625758
1	2020-08-02 12:15:00	L	after	2.31299	11.7371	87.9946	0.268276	53.1036	1
1	2020-08-02 12:45:00	L	after	2.42386	18.6452	80.9524	0.402414	59.4045	0.877878
1	2020-08-02 13:14:59	L	after	2.24394	23.7809	75.7515	0.467602	67.6086	0.781818
1	2020-08-02 13:45:00	L	after	2.91957	13.5903	86.0041	0.40568	62.5505	0.937725
1	2020-08-02 14:15:00	L	after	3.14231	13.253	86.0107	0.736278	50.2275	0.873739
1	2020-08-02 14:44:59	L	after	3.50995	7.47664	90.8545	1.66889	51.6028	0.960815
1	2020-08-02 15:15:00	L	contr	2.836	16.2216	82.7103	1.06809	57.513	0.755176
1	2020-08-02 15:45:00	L	contr	2.46344	20.6413	78.4235	0.935204	52.4607	0.696923
1	2020-08-02 16:14:59	L	contr	2.87721	13.2933	85.5711	1.1356	63.6164	0.766428
1	2020-08-02 16:45:00	L	contr	2.19577	21.1089	78.8243	0.0668	36.1645	0.791611
1	2020-08-02 17:15:00	L	contr	3.29518	11.9652	86.8984	1.13636	42.26	0.988979
1	2020-08-02 17:44:59	L	contr	2.63895	9.02406	90.4412	0.534759	41.0402	0.959013
1	2020-08-03 12:15:00	L	contr	3.44134	3.73832	95.5941	0.667557	27.7487	0.680756
1	2020-08-03 12:45:00	L	contr	2.84073	17.7583	81.9716	0.270088	51.9099	0.8432
1	2020-08-03 13:14:59	L	contr	2.50946	18.796	81.0702	0.133779	57.7846	0.818001
1	2020-08-03 13:45:00	L	contr	2.78761	21.5097	78.2899	0.200401	35.0888	0.831349
1	2020-08-03 14:15:00	L	contr	2.86069	15.2247	84.0376	0.73776	42.2719	0.871166
1	2020-08-03 14:44:59	L	contr	1.60377	43.2487	56.484	0.26738	76.0864	0.176861
1	2020-08-03 15:15:00	L	after	1.63465	43.5915	56.4085	0	77.993	0.242768
1	2020-08-03 15:45:00	L	after	3.43692	13.369	85.762	0.868984	44.3332	0.808883
1	2020-08-03 16:14:59	L	after	2.83968	19.9866	79.3449	0.668449	40.4584	0.584072
1	2020-08-03 16:45:00	L	after	3.39319	11.4152	87.6502	0.934579	69.8242	0.997238
1	2020-08-03 17:15:00	L	after	2.00193	26.6711	73.1952	0.13369	48.3373	0.527335
1	2020-08-03 17:44:59	L	after	1.76083	37.5251	62.2742	0.200669	74.0331	0.833864
2	2020-07-31 12:15:00	L	contr	0.416149	89.9531	10.0469	0	46.796	0.186143
2	2020-07-31 12:45:00	L	contr	1.46851	41.6834	58.3166	0	26.1957	0.850249
2	2020-07-31 13:14:59	L	contr	1.44753	33.2888	66.7112	0	24.4097	0.455671
2	2020-07-31 13:45:00	L	contr	1.56172	31.9732	67.9599	0.06689	28.5876	0.584625
2	2020-07-31 14:15:00	L	contr	1.71383	22.8457	77.0875	0.0668	25.1193	0.496803
2	2020-07-31 14:44:59	L	contr	1.04791	53.7688	46.2312	0	47.9942	0.378857
2	2020-07-31 15:15:00	L	contr	1.62235	27.5401	72.4599	0	32.5706	0.646477
2	2020-07-31 15:45:00	L	contr	1.32546	36.0053	63.9947	0	42.3042	0.539752
2	2020-07-31 16:14:59	L	contr	1.25561	35.4709	64.5291	0	34.7404	0.230017
2	2020-07-31 16:45:00	L	contr	1.55795	21.8729	78.0602	0.06689	31.3199	0.308683
2	2020-07-31 17:15:00	L	contr	3.19923	8.61148	90.988	0.400534	41.1402	1
2	2020-07-31 17:44:59	L	contr	2.14374	9.36455	90.6355	0	39.8106	0.696776
2	2020-08-01 12:15:00	L	contr	0.942954	63.5452	36.1873	0.267559	33.3515	0.696002
2	2020-08-01 12:45:00	L	contr	2.28417	4.87642	94.99	0.133601	22.8439	0.596952
2	2020-08-01 13:14:59	L	contr	1.78387	11.1482	88.785	0.066756	27.3016	0.698324
2	2020-08-01 13:45:00	L	contr	2.16306	11.7568	87.976	0.267201	23.4091	0.494754
2	2020-08-01 14:15:00	L	contr	1.60564	17.0341	82.9659	0	32.1441	0.469037
2	2020-08-01 14:44:59	L	contr	2.27661	6.61765	93.3824	0	26.4875	0.634512
2	2020-08-01 15:15:00	L	contr	1.38685	30.1205	69.8795	0	29.6438	0.238037
2	2020-08-01 15:45:00	L	contr	1.07128	55.2737	44.7263	0	69.8555	0.534844
2	2020-08-01 16:14:59	L	contr	1.52944	28.6382	71.1615	0.200267	54.0718	0.672362
2	2020-08-01 16:45:00	L	contr	1.42207	36.1873	63.8127	0	52.0295	0.722511
2	2020-08-01 17:15:00	L	contr	0.912257	61.471	38.529	0	70.5632	0.645742
2	2020-08-01 17:44:59	L	contr	0.975918	64.6862	35.3138	0	43.336	0.186697
2	2020-08-02 12:15:00	L	after	0.770321	72.2296	27.7704	0	35.6374	0.171817
2	2020-08-02 12:45:00	L	after	1.86468	19.1589	80.8411	0	35.9208	0.565952
2	2020-08-02 13:14:59	L	after	1.35612	38.8369	61.1631	0	50.9683	0.634512
2	2020-08-02 13:45:00	L	after	1.78601	20.8027	78.9967	0.200669	27.1422	0.597681
2	2020-08-02 14:15:00	L	after	1.38553	40.526	59.474	0	29.0939	0.108074
2	2020-08-02 14:44:59	L	after	1.42703	28.5905	71.4095	0	26.2175	0.359626
2	2020-08-02 15:15:00	L	contr	2.29589	13.9799	85.4181	0.602007	24.3639	0.363378
2	2020-08-02 15:45:00	L	contr	1.76628	20.8945	79.1055	0	47.2898	0.734342
2	2020-08-02 16:14:59	L	contr	1.90646	33.6449	65.8211	0.534045	24.0476	0.637495
2	2020-08-02 16:45:00	L	contr	2.20977	16.7781	82.2861	0.935829	22.3706	0.616728
2	2020-08-02 17:15:00	L	contr	2.29113	10.4278	89.1711	0.40107	32.6201	0.541157
2	2020-08-02 17:44:59	L	contr	1.53622	33.3779	66.6221	0	27.6391	0.291888
2	2020-08-03 12:15:00	L	contr	1.93353	12.4415	87.5585	0	18.0174	0.502279
2	2020-08-03 12:45:00	L	contr	1.95356	13.8277	86.1055	0.0668	27.0889	0.522292
2	2020-08-03 13:14:59	L	contr	1.72537	21.1757	78.8243	0	38.661	0.667628
2	2020-08-03 13:45:00	L	contr	1.63954	11.69	88.31	0	26.614	0.277055
2	2020-08-03 14:15:00	L	contr	0.983125	58.183	41.817	0	48.9187	0.110169
2	2020-08-03 14:44:59	L	contr	1.91457	12.8428	86.9565	0.200669	20.8852	0.527162
2	2020-08-03 15:15:00	L	after	1.68879	14.8396	85.1604	0	36.0583	0.35153
2	2020-08-03 15:45:00	L	after	1.8236	15.3743	84.5588	0.066845	22.1374	0.31594
2	2020-08-03 16:14:59	L	after	1.50107	24.6493	75.3507	0	25.4803	0.568096
2	2020-08-03 16:45:00	L	after	1.3699	39.0114	60.9886	0	35.211	0.248416
2	2020-08-03 17:15:00	L	after	1.8253	10.7548	89.2452	0	29.3374	0.449694
2	2020-08-03 17:44:59	L	after	1.76188	11.3788	88.6212	0	26.5862	0.49612
3	2020-07-31 12:15:00	L	contr	2.96005	5.55184	93.913	0.535117	23.5897	0.733687
3	2020-07-31 12:45:00	L	contr	2.75968	4.34492	95.5882	0.066845	29.2171	0.896195
3	2020-07-31 13:14:59	L	contr	1.86776	16.8224	83.1108	0.066756	32.3948	0.716377
3	2020-07-31 13:45:00	L	contr	2.04617	16.5775	83.3556	0.066845	27.5385	0.597848
3	2020-07-31 14:15:00	L	contr	1.80183	11.8236	88.0428	0.133601	36.9509	0.480663
3	2020-07-31 14:44:59	L	contr	2.17764	5.69575	94.3043	0	21.239	0.601011
3	2020-07-31 15:15:00	L	contr	2.03541	8.63454	91.2985	0.066934	31.4011	0.471645
3	2020-07-31 15:45:00	L	contr	2.40576	4.95979	94.9732	0.067024	27.5013	0.776462
3	2020-07-31 16:14:59	L	contr	1.90348	10.8812	88.9853	0.133511	25.618	0.260754
3	2020-07-31 16:45:00	L	contr	1.83156	20.6382	79.294	0.067889	30.403	0.636364
3	2020-07-31 17:15:00	L	contr	2.3265	7.81041	91.6555	0.534045	29.6651	0.456509
3	2020-07-31 17:44:59	L	contr	2.33438	8.61723	91.0488	0.334001	29.0954	0.441933
3	2020-08-01 12:15:00	L	contr	2.17905	16.9231	82.2074	0.869565	23.6245	0.678459
3	2020-08-01 12:45:00	L	contr	2.21664	5.9492	94.0508	0	17.6912	0.699245
3	2020-08-01 13:14:59	L	contr	1.64797	20.5214	79.4118	0.066845	24.8555	0.270713
3	2020-08-01 13:45:00	L	contr	2.63158	5.82329	93.2396	0.937082	22.507	0.536418
3	2020-08-01 14:15:00	L	contr	2.49948	3.27103	96.1949	0.534045	30.3129	0.505198
3	2020-08-01 14:44:59	L	contr	2.0405	11.482	87.8505	0.667557	27.582	0.418376
3	2020-08-01 15:15:00	L	contr	1.73301	18.1271	81.8729	0	31.5088	0.625018
3	2020-08-01 15:45:00	L	contr	1.46646	34.23	65.7028	0.067249	41.0835	0.723437
3	2020-08-01 16:14:59	L	contr	1.68454	24.7978	75.2022	0	62.9549	0.053231
3	2020-08-01 16:45:00	L	contr	1.72156	13.3021	86.6979	0	23.9101	0.319734
3	2020-08-01 17:15:00	L	contr	1.59131	27.1696	72.8304	0	49.839	0.581186
3	2020-08-01 17:44:59	L	contr	1.76867	24.4147	75.5184	0.06689	39.6902	0.427494
3	2020-08-02 12:15:00	L	after	1.58405	27.036	72.8972	0.066756	21.3965	0.477961
3	2020-08-02 12:45:00	L	after	1.8493	10.4348	89.4314	0.133779	20.7821	0.448541
3	2020-08-02 13:14:59	L	after	1.45228	31.4629	68.5371	0	21.964	0.355421
3	2020-08-02 13:45:00	L	after	1.91436	7.21925	92.7139	0.066845	23.7378	0.386251
3	2020-08-02 14:15:00	L	after	1.79153	15.2203	84.1121	0.667557	19.2582	0.686127
3	2020-08-02 14:44:59	L	after	1.89752	16.5997	83.0656	0.334672	20.6133	0.666263
3	2020-08-02 15:15:00	L	contr	2.48796	6.27923	93.654	0.0668	35.0136	0.868597
3	2020-08-02 15:45:00	L	contr	1.69548	13.9706	85.9626	0.066845	23.0153	0.904909
3	2020-08-02 16:14:59	L	contr	1.85855	7.02811	92.905	0.066934	18.0246	0.967136
3	2020-08-02 16:45:00	L	contr	1.84299	12.024	87.976	0	22.0035	0.678459
3	2020-08-02 17:15:00	L	contr	2.05629	10.9479	88.8518	0.200267	21.6535	0.65265
3	2020-08-02 17:44:59	L	contr	1.97188	22.2296	77.4366	0.333778	18.9747	0.842272
3	2020-08-03 12:15:00	L	contr	2.54065	7.49665	92.0348	0.468541	29.2855	0.995393
3	2020-08-03 12:45:00	L	contr	1.64404	25.3028	74.6972	0	25.4634	0.49486
3	2020-08-03 13:14:59	L	contr	2.25481	4.33912	94.3258	1.33511	23.1907	0.534317
3	2020-08-03 13:45:00	L	contr	1.65868	22.3632	77.5033	0.133511	27.0202	0.432729
3	2020-08-03 14:15:00	L	contr	1.85452	10.9626	89.0374	0	25.7502	0.390708
3	2020-08-03 14:44:59	L	contr	2.21338	8.29431	91.6388	0.06689	25.9955	0.406732
3	2020-08-03 15:15:00	L	after	1.50792	28.3233	71.6767	0	54.4687	0.508637
3	2020-08-03 15:45:00	L	after	2.08567	12.3498	87.6502	0	17.8737	0.498344
3	2020-08-03 16:14:59	L	after	1.82776	27.4733	72.4599	0.066845	15.7223	0.726584
3	2020-08-03 16:45:00	L	after	1.35585	38.4513	61.5487	0	24.8683	0.228997
3	2020-08-03 17:15:00	L	after	2.04274	14.276	85.6563	0.067659	25.0822	0.47322
3	2020-08-03 17:44:59	L	after	2.02472	18.4615	81.0702	0.468227	22.1205	0.351068
4	2020-07-31 12:15:00	L	contr	2.69754	14.6862	83.1108	2.20294	35.1741	0.718586
4	2020-07-31 12:45:00	L	contr	1.3313	30.0067	69.9933	0	37.4972	0.326283
4	2020-07-31 13:14:59	L	contr	3.1242	9.34579	90.5875	0.066756	38.0676	0.817897
4	2020-07-31 13:45:00	L	contr	1.11502	52.3139	47.6861	0	58.4916	0.48523
4	2020-07-31 14:15:00	L	contr	0.975511	59.3583	40.6417	0	56.4217	0.387358
4	2020-07-31 14:44:59	L	contr	1.62944	20.7283	79.0616	0.210084	38.3178	0.592151
4	2020-07-31 15:15:00	L	contr	2.11794	13.0174	86.9826	0	47.5305	0.548202
4	2020-07-31 15:45:00	L	contr	2.10191	9.68604	90.314	0	27.8049	0.461404
4	2020-07-31 16:14:59	L	contr	1.58244	39.238	60.2273	0.534759	35.3768	0.231731
4	2020-07-31 16:45:00	L	contr	1.48059	26.9257	73.0074	0.066979	27.4186	0.295471
4	2020-07-31 17:15:00	L	contr	1.86407	18.9045	81.0955	0	38.5175	0.424061
4	2020-07-31 17:44:59	L	contr	4.48049	4.21123	94.7861	1.00267	41.7036	1
4	2020-08-01 12:15:00	L	contr	0.844784	75.7515	24.0481	0.200401	47.3575	0.065312
4	2020-08-01 12:45:00	L	contr	0.313882	93.4856	6.51444	0	133.06	0.632278
4	2020-08-01 13:14:59	L	contr	0.052608	100	0	0	320.428	0.042185
4	2020-08-01 13:45:00	L	contr	1.65883	62.0758	34.3313	3.59281	22.7996	0.938379
4	2020-08-01 14:15:00	L	contr	2.81731	4.60922	95.2572	0.133601	31.9784	0.890053
4	2020-08-01 14:44:59	L	contr	2.81636	8.94526	90.988	0.066756	38.9862	0.872804
4	2020-08-01 15:15:00	L	contr	0.580492	84.0027	15.9973	0	87.101	0.093497
4	2020-08-01 15:45:00	L	contr	0.841256	69.21	30.79	0	33.1114	0.174011
4	2020-08-01 16:14:59	L	contr	0.739383	72.7455	27.2545	0	45.6838	0.089877
4	2020-08-01 16:45:00	L	contr	1.50981	29.3645	70.6355	0	25.632	0.363378
4	2020-08-01 17:15:00	L	contr	1.5569	24.9267	75	0.073314	32.2428	0.276862
4	2020-08-01 17:44:59	L	contr	3.20588	5.14019	94.7263	0.133511	37.6361	0.993558
4	2020-08-02 12:15:00	L	after	0.88126	64.8631	35.1369	0	30.6895	0.180615
4	2020-08-02 12:45:00	L	after	1.22726	47.3298	52.6035	0.066756	22.6663	0.603517
4	2020-08-02 13:14:59	L	after	1.84671	20.1113	78.9144	0.974252	24.2106	0.300261
4	2020-08-02 13:45:00	L	after	0.695401	75.2877	24.7123	0	63.1827	0.185589
4	2020-08-02 14:15:00	L	after	0.368237	97.3737	2.62626	0	154.272	1
4	2020-08-02 14:44:59	L	after	1.08906	53.3779	46.6221	0	47.5853	0.445723
4	2020-08-02 15:15:00	L	contr	1.48293	45.1203	54.8797	0	28.7279	0.739098
4	2020-08-02 15:45:00	L	contr	0.860143	63.4432	36.5568	0	40.7181	0.334242
4	2020-08-02 16:14:59	L	contr	0.973418	67.094	32.8348	0.071225	62.9257	0.773594
4	2020-08-02 16:45:00	L	contr	1.08819	54.6791	45.254	0.066845	23.8281	0.896131
4	2020-08-02 17:15:00	L	contr	0.367195	89.5819	10.3473	0.070872	76.1316	0.497672
4	2020-08-02 17:44:59	L	contr	1.49824	35.1839	64.8161	0	32.6506	0.17731
4	2020-08-03 12:15:00	L	contr	0.821727	67.4232	32.5768	0	37.0832	0.207909
4	2020-08-03 12:45:00	L	contr	0.934487	62.4457	37.5543	0	52.3266	0.376676
4	2020-08-03 13:14:59	L	contr	1.18825	50.3694	49.6306	0	34.7115	0.840493
4	2020-08-03 13:45:00	L	contr	0.78528	70.8192	29.1808	0	34.7205	0.322624
4	2020-08-03 14:15:00	L	contr	2.27189	18.7416	81.0576	0.200803	42.2365	0.865097
4	2020-08-03 14:44:59	L	contr	0.414104	86.2324	13.7676	0	37.0821	0.065312
4	2020-08-03 15:15:00	L	after	1.82304	42.8177	56.0083	1.17403	29.7565	0.234021
4	2020-08-03 15:45:00	L	after	1.07698	50.4065	49.5935	0	37.0517	0.755252
4	2020-08-03 16:14:59	L	after	1.23805	45.7219	54.2781	0	29.0476	0.365884
4	2020-08-03 16:45:00	L	after	0.527313	82.7328	17.2672	0	62.2862	0.958985
4	2020-08-03 17:15:00	L	after	0.581676	75.4895	24.5105	0	38.289	0.175659
4	2020-08-03 17:44:59	L	after	1.49353	60.0134	38.4461	1.54052	33.0408	0.152221

## Sheet: averaged_contr
Fish	Time	24(light-dark)	k>4	Avg. swimming speed (cm/s)				contr	events 02-03.08			Freezing time (%)				contr	events 02-03.08			Swimming time (%)				contr	events 02-03.08			Rapid movement time (%)				contr	events 02-03.08			Meandering (°/cm)				contr	events 02-03.08			"Walls/Inner area" ratio				contr	events 02-03.08
1	2020-07-31 12:15:00	L	contr	4.41861	3.30062	3.44134		3.72019	2.31299	after12-15		2.14047	15.1535	3.73832		7.01077	11.7371	after12-15		95.1171	82.777	95.5941		91.1627	87.9946	after12-15		2.74248	2.06943	0.667557		1.82649	0.268276	after12-15		35.5367	66.3306	27.7487		43.2053	53.1036	after12-15		0.717943	0.987148	0.680756		0.795282	1
1	2020-07-31 12:45:00	L	contr	4.0306	3.79038	2.84073		3.5539	2.42386	after12-15		6.54206	4.35365	17.7583		9.55133	18.6452	after12-15		90.7877	94.7086	81.9716		89.156	80.9524	after12-15		2.67023	0.937709	0.270088		1.29267	0.402414	after12-15		47.8154	46.3996	51.9099		48.7083	59.4045	after12-15		0.959013	0.992625	0.8432		0.931613	0.877878
1	2020-07-31 13:14:59	L	contr	5.50144	3.1082	2.50946		3.70637	2.24394	after12-15		4.14438	17.8905	18.796		13.6103	23.7809	after12-15		85.8289	81.1749	81.0702		82.6913	75.7515	after12-15		10.0267	0.934579	0.133779		3.69837	0.467602	after12-15		52.222	43.5794	57.7846		51.1953	67.6086	after12-15		0.996319	0.868597	0.818001		0.894306	0.781818
1	2020-07-31 13:45:00	L	contr	3.24398	4.69125	2.78761		3.57428	2.91957	after12-15		10.8812	6.07477	21.5097		12.8219	13.5903	after12-15		87.1162	88.9186	78.2899		84.7749	86.0041	after12-15		2.00267	5.00668	0.200401		2.40325	0.40568	after12-15		64.1637	31.9229	35.0888		43.7251	62.5505	after12-15		0.962733	0.793248	0.831349		0.862443	0.937725
1	2020-07-31 14:15:00	L	contr	4.23881	1.84321	2.86069		2.9809	3.14231	after12-15		1.73565	21.1615	15.2247		12.7073	13.253	after12-15		95.3271	78.7717	84.0376		86.0455	86.0107	after12-15		2.93725	0.066756	0.73776		1.24726	0.736278	after12-15		32.0857	42.4851	42.2719		38.9476	50.2275	after12-15		0.795707	0.540628	0.871166		0.735834	0.873739
1	2020-07-31 14:44:59	L	contr	3.60116	2.65939	1.60377		2.62144	3.50995	after12-15		8.29847	9.08484	43.2487		20.2107	7.47664	after12-15		90.5858	90.4476	56.484		79.1724	90.8545	after12-15		1.11576	0.467602	0.26738		0.616914	1.66889	after12-15		48.1102	53.3214	76.0864		59.1727	51.6028	after12-15		0.806409	0.987148	0.176861		0.656806	0.960815
1	2020-07-31 15:15:00	L	contr	3.6872	4.04653	2.836		3.52324	1.63465	after15-18		2.01072	8.34446	16.2216		8.85894	43.5915	after15-18		96.8499	86.6489	82.7103		88.7363	56.4085	after15-18		1.13941	5.00668	1.06809		2.40473	0	after15-18		30.0246	44.6111	57.513		44.0496	77.993	after15-18		0.846847	0.780192	0.755176		0.794072	0.242768
1	2020-07-31 15:45:00	L	contr	4.32474	3.97956	2.46344		3.58924	3.43692	after15-18		5.24166	7.00935	20.6413		10.9641	13.369	after15-18		91.8993	91.6555	78.4235		87.3261	85.762	after15-18		2.85909	1.33511	0.935204		1.7098	0.868984	after15-18		35.5864	35.4514	52.4607		41.1662	44.3332	after15-18		0.774392	0.884931	0.696923		0.785415	0.808883
1	2020-07-31 16:14:59	L	contr	3.69511	2.77482	2.87721		3.11572	2.83968	after15-18		12.0321	23.489	13.2933		16.2714	19.9866	after15-18		86.4973	75.3434	85.5711		82.4706	79.3449	after15-18		1.47059	1.16758	1.1356		1.25792	0.668449	after15-18		34.072	40.1611	63.6164		45.9498	40.4584	after15-18		0.742409	0.765936	0.766428		0.758258	0.584072
1	2020-07-31 16:45:00	L	contr	4.40695	3.17699	2.19577		3.2599	3.39319	after15-18		5.48495	14.3621	21.1089		13.652	11.4152	after15-18		92.2408	84.0347	78.8243		85.0333	87.6502	after15-18		2.27425	1.60321	0.0668		1.31475	0.934579	after15-18		38.0232	39.1598	36.1645		37.7825	69.8242	after15-18		1	0.720296	0.791611		0.837302	0.997238
1	2020-07-31 17:15:00	L	contr	4.54113	4.68947	3.29518		4.17526	2.00193	after15-18		5.67423	11.0814	11.9652		9.57364	26.6711	after15-18		90.721	81.1081	86.8984		86.2425	73.1952	after15-18		3.60481	7.81041	1.13636		4.18386	0.13369	after15-18		42.1842	56.4983	42.26		46.9809	48.3373	after15-18		0.826332	0.868597	0.988979		0.894636	0.527335
1	2020-07-31 17:44:59	L	contr	4.66467	3.19715	2.63895		3.50026	1.76083	after15-18		5.03018	13.1597	9.02406		9.0713	37.5251	after15-18		89.5372	85.7047	90.4412		88.561	62.2742	after15-18		5.4326	1.1356	0.534759		2.36765	0.200669	after15-18		42.8264	50.0644	41.0402		44.6437	74.0331	after15-18		0.823155	0.625758	0.959013		0.802642	0.833864
2	2020-08-01 12:15:00	L	contr	0.416149	0.942954	1.93353		1.09754	0.770321	after12-15		89.9531	63.5452	12.4415		55.3132	72.2296	after12-15		10.0469	36.1873	87.5585		44.5976	27.7704	after12-15		0	0.267559	0.602007		0.289855	0	after12-15		46.796	33.3515	18.0174		32.7216	35.6374	after12-15		0.186143	0.696002	0.502279		0.461475	0.171817
2	2020-08-01 12:45:00	L	contr	1.46851	2.28417	1.95356		1.90208	1.86468	after12-15		41.6834	4.87642	13.8277		20.1291	19.1589	after12-15		58.3166	94.99	86.1055		79.8041	80.8411	after12-15		0	0.133601	0		0.0445337	0	after12-15		26.1957	22.8439	27.0889		25.3762	35.9208	after12-15		0.850249	0.596952	0.522292		0.656498	0.565952
2	2020-08-01 13:14:59	L	contr	1.44753	1.78387	1.72537		1.65226	1.35612	after12-15		33.2888	11.1482	21.1757		21.8709	38.8369	after12-15		66.7112	88.785	78.8243		78.1069	61.1631	after12-15		0	0.066756	0.534045		0.200267	0	after12-15		24.4097	27.3016	38.661		30.1241	50.9683	after12-15		0.455671	0.698324	0.667628		0.607208	0.634512
2	2020-08-01 13:45:00	L	contr	1.56172	2.16306	1.63954		1.78811	1.78601	after12-15		31.9732	11.7568	11.69		18.4734	20.8027	after12-15		67.9599	87.976	88.31		81.4153	78.9967	after12-15		0.06689	0.267201	0.935829		0.423307	0.200669	after12-15		28.5876	23.4091	26.614		26.2036	27.1422	after12-15		0.584625	0.494754	0.277055		0.452145	0.597681
2	2020-08-01 14:15:00	L	contr	1.71383	1.60564	0.983125		1.4342	1.38553	after12-15		22.8457	17.0341	58.183		32.6876	40.526	after12-15		77.0875	82.9659	41.817		67.2901	59.474	after12-15		0.0668	0	0.40107		0.155957	0	after12-15		25.1193	32.1441	48.9187		35.3941	29.0939	after12-15		0.496803	0.469037	0.110169		0.35867	0.108074
2	2020-08-01 14:44:59	L	contr	1.04791	2.27661	1.91457		1.74637	1.42703	after12-15		53.7688	6.61765	12.8428		24.4098	28.5905	after12-15		46.2312	93.3824	86.9565		75.5233	71.4095	after12-15		0	0	0		0	0	after12-15		47.9942	26.4875	20.8852		31.7889	26.2175	after12-15		0.378857	0.634512	0.527162		0.51351	0.359626
2	2020-08-01 15:15:00	L	contr	1.62235	1.38685	2.29589		1.76836	1.68879	after15-18		27.5401	30.1205	13.9799		23.8802	14.8396	after15-18		72.4599	69.8795	85.4181		75.9192	85.1604	after15-18		0	0	0		0	0	after15-18		32.5706	29.6438	24.3639		28.8594	36.0583	after15-18		0.646477	0.238037	0.363378		0.415964	0.35153
2	2020-08-01 15:45:00	L	contr	1.32546	1.07128	1.76628		1.38767	1.8236	after15-18		36.0053	55.2737	20.8945		37.3912	15.3743	after15-18		63.9947	44.7263	79.1055		62.6088	84.5588	after15-18		0	0	0.0668		0.0222667	0.066845	after15-18		42.3042	69.8555	47.2898		53.1498	22.1374	after15-18		0.539752	0.534844	0.734342		0.602979	0.31594
2	2020-08-01 16:14:59	L	contr	1.25561	1.52944	1.90646		1.56384	1.50107	after15-18		35.4709	28.6382	33.6449		32.5847	24.6493	after15-18		64.5291	71.1615	65.8211		67.1706	75.3507	after15-18		0	0.200267	0		0.0667557	0	after15-18		34.7404	54.0718	24.0476		37.6199	25.4803	after15-18		0.230017	0.672362	0.637495		0.513291	0.568096
2	2020-08-01 16:45:00	L	contr	1.55795	1.42207	2.20977		1.72993	1.3699	after15-18		21.8729	36.1873	16.7781		24.9461	39.0114	after15-18		78.0602	63.8127	82.2861		74.7197	60.9886	after15-18		0.06689	0	0		0.0222967	0	after15-18		31.3199	52.0295	22.3706		35.24	35.211	after15-18		0.308683	0.722511	0.616728		0.549307	0.248416
2	2020-08-01 17:15:00	L	contr	3.19923	0.912257	2.29113		2.13421	1.8253	after15-18		8.61148	61.471	10.4278		26.8368	10.7548	after15-18		90.988	38.529	89.1711		72.896	89.2452	after15-18		0.400534	0	0		0.133511	0	after15-18		41.1402	70.5632	32.6201		48.1078	29.3374	after15-18		1	0.645742	0.541157		0.728966	0.449694
2	2020-08-01 17:44:59	L	contr	2.14374	0.975918	1.53622		1.55196	1.76188	after15-18		9.36455	64.6862	33.3779		35.8096	11.3788	after15-18		90.6355	35.3138	66.6221		64.1904	88.6212	after15-18		0	0	0.200669		0.0668897	0	after15-18		39.8106	43.336	27.6391		36.9286	26.5862	after15-18		0.696776	0.186697	0.291888		0.391787	0.49612
3	2020-08-02 12:15:00	L	after	2.96005	2.17905	2.54065		2.55992	1.58405	after12-15		5.55184	16.9231	7.49665		9.99052	27.036	after12-15		93.913	82.2074	92.0348		89.3851	72.8972	after12-15		0.535117	0.869565	0.468541		0.624408	0.066756	after12-15		23.5897	23.6245	29.2855		25.4999	21.3965	after12-15		0.733687	0.678459	0.995393		0.802513	0.477961
3	2020-08-02 12:45:00	L	after	2.75968	2.21664	1.64404		2.20679	1.8493	after12-15		4.34492	5.9492	25.3028		11.8656	10.4348	after12-15		95.5882	94.0508	74.6972		88.1121	89.4314	after12-15		0.066845	0	0		0.0222817	0.133779	after12-15		29.2171	17.6912	25.4634		24.1239	20.7821	after12-15		0.896195	0.699245	0.49486		0.696767	0.448541
3	2020-08-02 13:14:59	L	after	1.86776	1.64797	2.25481		1.92351	1.45228	after12-15		16.8224	20.5214	4.33912		13.8943	31.4629	after12-15		83.1108	79.4118	94.3258		85.6161	68.5371	after12-15		0.066756	0.066845	1.33511		0.489571	0	after12-15		32.3948	24.8555	23.1907		26.8137	21.964	after12-15		0.716377	0.270713	0.534317		0.507136	0.355421
3	2020-08-02 13:45:00	L	after	2.04617	2.63158	1.65868		2.11214	1.91436	after12-15		16.5775	5.82329	22.3632		14.9213	7.21925	after12-15		83.3556	93.2396	77.5033		84.6995	92.7139	after12-15		0.066845	0.937082	0.133511		0.379146	0.066845	after12-15		27.5385	22.507	27.0202		25.6886	23.7378	after12-15		0.597848	0.536418	0.432729		0.522332	0.386251
3	2020-08-02 14:15:00	L	after	1.80183	2.49948	1.85452		2.05194	1.79153	after12-15		11.8236	3.27103	10.9626		8.68575	15.2203	after12-15		88.0428	96.1949	89.0374		91.0917	84.1121	after12-15		0.133601	0.534045	0		0.222549	0.667557	after12-15		36.9509	30.3129	25.7502		31.0046	19.2582	after12-15		0.480663	0.505198	0.390708		0.458856	0.686127
3	2020-08-02 14:44:59	L	after	2.17764	2.0405	2.21338		2.14384	1.89752	after12-15		5.69575	11.482	8.29431		8.49068	16.5997	after12-15		94.3043	87.8505	91.6388		91.2645	83.0656	after12-15		0	0.667557	0.06689		0.244816	0.334672	after12-15		21.239	27.582	25.9955		24.9388	20.6133	after12-15		0.601011	0.418376	0.406732		0.475373	0.666263
3	2020-08-02 15:15:00	L	contr	2.03541	1.73301	2.48796		2.08546	1.50792	after15-18		8.63454	18.1271	6.27923		11.0136	28.3233	after15-18		91.2985	81.8729	93.654		88.9418	71.6767	after15-18		0.066934	0	0.0668		0.044578	0	after15-18		31.4011	31.5088	35.0136		32.6412	54.4687	after15-18		0.471645	0.625018	0.868597		0.655087	0.508637
3	2020-08-02 15:45:00	L	contr	2.40576	1.46646	1.69548		1.8559	2.08567	after15-18		4.95979	34.23	13.9706		17.7201	12.3498	after15-18		94.9732	65.7028	85.9626		82.2128	87.6502	after15-18		0.067024	0.067249	0.066845		0.0670393	0	after15-18		27.5013	41.0835	23.0153		30.5334	17.8737	after15-18		0.776462	0.723437	0.904909		0.801603	0.498344
3	2020-08-02 16:14:59	L	contr	1.90348	1.68454	1.85855		1.81552	1.82776	after15-18		10.8812	24.7978	7.02811		14.2357	27.4733	after15-18		88.9853	75.2022	92.905		85.6975	72.4599	after15-18		0.133511	0	0.066934		0.066815	0.066845	after15-18		25.618	62.9549	18.0246		35.5325	15.7223	after15-18		0.260754	0.053231	0.967136		0.42704	0.726584
3	2020-08-02 16:45:00	L	contr	1.83156	1.72156	1.84299		1.7987	1.35585	after15-18		20.6382	13.3021	12.024		15.3214	38.4513	after15-18		79.294	86.6979	87.976		84.6559	61.5487	after15-18		0.067889	0	0		0.0226297	0	after15-18		30.403	23.9101	22.0035		25.4389	24.8683	after15-18		0.636364	0.319734	0.678459		0.544852	0.228997
3	2020-08-02 17:15:00	L	contr	2.3265	1.59131	2.05629		1.99137	2.04274	after15-18		7.81041	27.1696	10.9479		15.3093	14.276	after15-18		91.6555	72.8304	88.8518		84.4459	85.6563	after15-18		0.534045	0	0.200267		0.244771	0.067659	after15-18		29.6651	49.839	21.6535		33.7192	25.0822	after15-18		0.456509	0.581186	0.65265		0.563448	0.47322
3	2020-08-02 17:44:59	L	contr	2.33438	1.76867	1.97188		2.02498	2.02472	after15-18		8.61723	24.4147	22.2296		18.4205	18.4615	after15-18		91.0488	75.5184	77.4366		81.3346	81.0702	after15-18		0.334001	0.06689	0.333778		0.24489	0.468227	after15-18		29.0954	39.6902	18.9747		29.2535	22.1205	after15-18		0.441933	0.427494	0.842272		0.570566	0.351068
4	2020-08-03 12:15:00	L	contr	2.69754	0.844784	0.821727		1.45468	0.88126	after12-15		14.6862	75.7515	67.4232		52.6203	64.8631	after12-15		83.1108	24.0481	32.5768		46.5786	35.1369	after12-15		2.20294	0.200401	0		0.801113	0	after12-15		35.1741	47.3575	37.0832		39.8716	30.6895	after12-15		0.718586	0.065312	0.207909		0.330602	0.180615
4	2020-08-03 12:45:00	L	contr	1.3313	0.313882	0.934487		0.85989	1.22726	after12-15		30.0067	93.4856	62.4457		61.9793	47.3298	after12-15		69.9933	6.51444	37.5543		38.0207	52.6035	after12-15		0	0	0		0	0.066756	after12-15		37.4972	133.06	52.3266		74.2946	22.6663	after12-15		0.326283	0.632278	0.376676		0.445079	0.603517
4	2020-08-03 13:14:59	L	contr	3.1242	0.052608	1.18825		1.45502	1.84671	after12-15		9.34579	100	50.3694		53.2384	20.1113	after12-15		90.5875	0	49.6306		46.7394	78.9144	after12-15		0.066756	0	0.071225		0.0459937	0.974252	after12-15		38.0676	320.428	34.7115		131.069	24.2106	after12-15		0.817897	0.042185	0.840493		0.566858	0.300261
4	2020-08-03 13:45:00	L	contr	1.11502	1.65883	0.78528		1.18638	0.695401	after12-15		52.3139	62.0758	70.8192		61.7363	75.2877	after12-15		47.6861	34.3313	29.1808		37.0661	24.7123	after12-15		0	3.59281	0.066845		1.21989	0	after12-15		58.4916	22.7996	34.7205		38.6706	63.1827	after12-15		0.48523	0.938379	0.322624		0.582078	0.185589
4	2020-08-03 14:15:00	L	contr	0.975511	2.81731	2.27189		2.02157	0.368237	after12-15		59.3583	4.60922	18.7416		27.5697	97.3737	after12-15		40.6417	95.2572	81.0576		72.3188	2.62626	after12-15		0	0.133601	0.070872		0.0681577	0	after12-15		56.4217	31.9784	42.2365		43.5455	154.272	after12-15		0.387358	0.890053	0.865097		0.714169	1
4	2020-08-03 14:44:59	L	contr	1.62944	2.81636	0.414104		1.61997	1.08906	after12-15		20.7283	8.94526	86.2324		38.6353	53.3779	after12-15		79.0616	90.988	13.7676		61.2724	46.6221	after12-15		0.210084	0.066756	0		0.09228	0	after12-15		38.3178	38.9862	37.0821		38.1287	47.5853	after12-15		0.592151	0.872804	0.065312		0.510089	0.445723
4	2020-08-03 15:15:00	L	after	2.11794	0.580492	1.48293		1.39379	1.82304	after15-18		13.0174	84.0027	45.1203		47.3801	42.8177	after15-18		86.9826	15.9973	54.8797		52.6199	56.0083	after15-18		0	0	0		0	1.17403	after15-18		47.5305	87.101	28.7279		54.4531	29.7565	after15-18		0.548202	0.093497	0.739098		0.460266	0.234021
4	2020-08-03 15:45:00	L	after	2.10191	0.841256	0.860143		1.26777	1.07698	after15-18		9.68604	69.21	63.4432		47.4464	50.4065	after15-18		90.314	30.79	36.5568		52.5536	49.5935	after15-18		0	0	0		0	0	after15-18		27.8049	33.1114	40.7181		33.8781	37.0517	after15-18		0.461404	0.174011	0.334242		0.323219	0.755252
4	2020-08-03 16:14:59	L	after	1.58244	0.739383	0.973418		1.09841	1.23805	after15-18		39.238	72.7455	67.094		59.6925	45.7219	after15-18		60.2273	27.2545	32.8348		40.1055	54.2781	after15-18		0.534759	0	0		0.178253	0	after15-18		35.3768	45.6838	62.9257		47.9954	29.0476	after15-18		0.231731	0.089877	0.773594		0.365067	0.365884
4	2020-08-03 16:45:00	L	after	1.48059	1.50981	1.08819		1.35953	0.527313	after15-18		26.9257	29.3645	54.6791		36.9898	82.7328	after15-18		73.0074	70.6355	45.254		62.9656	17.2672	after15-18		0.066979	0	0		0.0223263	0	after15-18		27.4186	25.632	23.8281		25.6262	62.2862	after15-18		0.295471	0.363378	0.896131		0.518327	0.958985
4	2020-08-03 17:15:00	L	after	1.86407	1.5569	0.367195		1.26272	0.581676	after15-18		18.9045	24.9267	89.5819		44.471	75.4895	after15-18		81.0955	75	10.3473		55.4809	24.5105	after15-18		0	0.073314	0.200803		0.0913723	0	after15-18		38.5175	32.2428	76.1316		48.964	38.289	after15-18		0.424061	0.276862	0.497672		0.399532	0.175659
4	2020-08-03 17:44:59	L	after	4.48049	3.20588	1.49824		3.06154	1.49353	after15-18		4.21123	5.14019	35.1839		14.8451	60.0134	after15-18		94.7861	94.7263	64.8161		84.7762	38.4461	after15-18		1.00267	0.133511	0		0.378728	1.54052	after15-18		41.7036	37.6361	32.6506		37.3301	33.0408	after15-18		1	0.993558	0.17731		0.723623	0.152221
[truncated: 1 more columns]

## Sheet: t-test depended_sampl_data
Fish	Avg. swimming speed (cm/s)	contr	events 02-03.08		Freezing time (%)	contr	events 02-03.08		Swimming time (%)	contr	events 02-03.08		Rapid movement time (%)	contr	events 02-03.08		Meandering (°/cm)	contr	events 02-03.08		"Walls/Inner area" ratio	contr	events 02-03.08
1		3.72019	2.31299	after12-15		7.01077	11.7371	after12-15		91.1627	87.9946	after12-15		1.82649	0.268276	after12-15		43.2053	53.1036	after12-15		0.795282	1	after12-15
1		3.5539	2.42386	after12-15		9.55133	18.6452	after12-15		89.156	80.9524	after12-15		1.29267	0.402414	after12-15		48.7083	59.4045	after12-15		0.931613	0.877878	after12-15
1		3.70637	2.24394	after12-15		13.6103	23.7809	after12-15		82.6913	75.7515	after12-15		3.69837	0.467602	after12-15		51.1953	67.6086	after12-15		0.894306	0.781818	after12-15
1		3.57428	2.91957	after12-15		12.8219	13.5903	after12-15		84.7749	86.0041	after12-15		2.40325	0.40568	after12-15		43.7251	62.5505	after12-15		0.862443	0.937725	after12-15
1		2.9809	3.14231	after12-15		12.7073	13.253	after12-15		86.0455	86.0107	after12-15		1.24726	0.736278	after12-15		38.9476	50.2275	after12-15		0.735834	0.873739	after12-15
1		2.62144	3.50995	after12-15		20.2107	7.47664	after12-15		79.1724	90.8545	after12-15		0.616914	1.66889	after12-15		59.1727	51.6028	after12-15		0.656806	0.960815	after12-15
1		3.52324	1.63465	after15-18		8.85894	43.5915	after15-18		88.7363	56.4085	after15-18		2.40473	0	after15-18		44.0496	77.993	after15-18		0.794072	0.242768	after15-18
1		3.58924	3.43692	after15-18		10.9641	13.369	after15-18		87.3261	85.762	after15-18		1.7098	0.868984	after15-18		41.1662	44.3332	after15-18		0.785415	0.808883	after15-18
1		3.11572	2.83968	after15-18		16.2714	19.9866	after15-18		82.4706	79.3449	after15-18		1.25792	0.668449	after15-18		45.9498	40.4584	after15-18		0.758258	0.584072	after15-18
1		3.2599	3.39319	after15-18		13.652	11.4152	after15-18		85.0333	87.6502	after15-18		1.31475	0.934579	after15-18		37.7825	69.8242	after15-18		0.837302	0.997238	after15-18
1		4.17526	2.00193	after15-18		9.57364	26.6711	after15-18		86.2425	73.1952	after15-18		4.18386	0.13369	after15-18		46.9809	48.3373	after15-18		0.894636	0.527335	after15-18
1		3.50026	1.76083	after15-18		9.0713	37.5251	after15-18		88.561	62.2742	after15-18		2.36765	0.200669	after15-18		44.6437	74.0331	after15-18		0.802642	0.833864	after15-18
2		1.09754	0.770321	after12-15		55.3132	72.2296	after12-15		44.5976	27.7704	after12-15		0.289855	0	after12-15		32.7216	35.6374	after12-15		0.461475	0.171817	after12-15
2		1.90208	1.86468	after12-15		20.1291	19.1589	after12-15		79.8041	80.8411	after12-15		0.0445337	0	after12-15		25.3762	35.9208	after12-15		0.656498	0.565952	after12-15
2		1.65226	1.35612	after12-15		21.8709	38.8369	after12-15		78.1069	61.1631	after12-15		0.200267	0	after12-15		30.1241	50.9683	after12-15		0.607208	0.634512	after12-15
2		1.78811	1.78601	after12-15		18.4734	20.8027	after12-15		81.4153	78.9967	after12-15		0.423307	0.200669	after12-15		26.2036	27.1422	after12-15		0.452145	0.597681	after12-15
2		1.4342	1.38553	after12-15		32.6876	40.526	after12-15		67.2901	59.474	after12-15		0.155957	0	after12-15		35.3941	29.0939	after12-15		0.35867	0.108074	after12-15
2		1.74637	1.42703	after12-15		24.4098	28.5905	after12-15		75.5233	71.4095	after12-15		0	0	after12-15		31.7889	26.2175	after12-15		0.51351	0.359626	after12-15
2		1.76836	1.68879	after15-18		23.8802	14.8396	after15-18		75.9192	85.1604	after15-18		0	0	after15-18		28.8594	36.0583	after15-18		0.415964	0.35153	after15-18
2		1.38767	1.8236	after15-18		37.3912	15.3743	after15-18		62.6088	84.5588	after15-18		0.0222667	0.066845	after15-18		53.1498	22.1374	after15-18		0.602979	0.31594	after15-18
2		1.56384	1.50107	after15-18		32.5847	24.6493	after15-18		67.1706	75.3507	after15-18		0.0667557	0	after15-18		37.6199	25.4803	after15-18		0.513291	0.568096	after15-18
2		1.72993	1.3699	after15-18		24.9461	39.0114	after15-18		74.7197	60.9886	after15-18		0.0222967	0	after15-18		35.24	35.211	after15-18		0.549307	0.248416	after15-18
2		2.13421	1.8253	after15-18		26.8368	10.7548	after15-18		72.896	89.2452	after15-18		0.133511	0	after15-18		48.1078	29.3374	after15-18		0.728966	0.449694	after15-18
2		1.55196	1.76188	after15-18		35.8096	11.3788	after15-18		64.1904	88.6212	after15-18		0.0668897	0	after15-18		36.9286	26.5862	after15-18		0.391787	0.49612	after15-18
3		2.55992	1.58405	after12-15		9.99052	27.036	after12-15		89.3851	72.8972	after12-15		0.624408	0.066756	after12-15		25.4999	21.3965	after12-15		0.802513	0.477961	after12-15
3		2.20679	1.8493	after12-15		11.8656	10.4348	after12-15		88.1121	89.4314	after12-15		0.0222817	0.133779	after12-15		24.1239	20.7821	after12-15		0.696767	0.448541	after12-15
3		1.92351	1.45228	after12-15		13.8943	31.4629	after12-15		85.6161	68.5371	after12-15		0.489571	0	after12-15		26.8137	21.964	after12-15		0.507136	0.355421	after12-15
3		2.11214	1.91436	after12-15		14.9213	7.21925	after12-15		84.6995	92.7139	after12-15		0.379146	0.066845	after12-15		25.6886	23.7378	after12-15		0.522332	0.386251	after12-15
3		2.05194	1.79153	after12-15		8.68575	15.2203	after12-15		91.0917	84.1121	after12-15		0.222549	0.667557	after12-15		31.0046	19.2582	after12-15		0.458856	0.686127	after12-15
3		2.14384	1.89752	after12-15		8.49068	16.5997	after12-15		91.2645	83.0656	after12-15		0.244816	0.334672	after12-15		24.9388	20.6133	after12-15		0.475373	0.666263	after12-15
3		2.08546	1.50792	after15-18		11.0136	28.3233	after15-18		88.9418	71.6767	after15-18		0.044578	0	after15-18		32.6412	54.4687	after15-18		0.655087	0.508637	after15-18
3		1.8559	2.08567	after15-18		17.7201	12.3498	after15-18		82.2128	87.6502	after15-18		0.0670393	0	after15-18		30.5334	17.8737	after15-18		0.801603	0.498344	after15-18
3		1.81552	1.82776	after15-18		14.2357	27.4733	after15-18		85.6975	72.4599	after15-18		0.066815	0.066845	after15-18		35.5325	15.7223	after15-18		0.42704	0.726584	after15-18
3		1.7987	1.35585	after15-18		15.3214	38.4513	after15-18		84.6559	61.5487	after15-18		0.0226297	0	after15-18		25.4389	24.8683	after15-18		0.544852	0.228997	after15-18
3		1.99137	2.04274	after15-18		15.3093	14.276	after15-18		84.4459	85.6563	after15-18		0.244771	0.067659	after15-18		33.7192	25.0822	after15-18		0.563448	0.47322	after15-18
3		2.02498	2.02472	after15-18		18.4205	18.4615	after15-18		81.3346	81.0702	after15-18		0.24489	0.468227	after15-18		29.2535	22.1205	after15-18		0.570566	0.351068	after15-18
4		1.45468	0.88126	after12-15		52.6203	64.8631	after12-15		46.5786	35.1369	after12-15		0.801113	0	after12-15		39.8716	30.6895	after12-15		0.330602	0.180615	after12-15
4		0.85989	1.22726	after12-15		61.9793	47.3298	after12-15		38.0207	52.6035	after12-15		0	0.066756	after12-15		74.2946	22.6663	after12-15		0.445079	0.603517	after12-15
4		1.45502	1.84671	after12-15		53.2384	20.1113	after12-15		46.7394	78.9144	after12-15		0.0459937	0.974252	after12-15		131.069	24.2106	after12-15		0.566858	0.300261	after12-15
4		1.18638	0.695401	after12-15		61.7363	75.2877	after12-15		37.0661	24.7123	after12-15		1.21989	0	after12-15		38.6706	63.1827	after12-15		0.582078	0.185589	after12-15
4		2.02157	0.368237	after12-15		27.5697	97.3737	after12-15		72.3188	2.62626	after12-15		0.0681577	0	after12-15		43.5455	154.272	after12-15		0.714169	1	after12-15
4		1.61997	1.08906	after12-15		38.6353	53.3779	after12-15		61.2724	46.6221	after12-15		0.09228	0	after12-15		38.1287	47.5853	after12-15		0.510089	0.445723	after12-15
4		1.39379	1.82304	after15-18		47.3801	42.8177	after15-18		52.6199	56.0083	after15-18		0	1.17403	after15-18		54.4531	29.7565	after15-18		0.460266	0.234021	after15-18
4		1.26777	1.07698	after15-18		47.4464	50.4065	after15-18		52.5536	49.5935	after15-18		0	0	after15-18		33.8781	37.0517	after15-18		0.323219	0.755252	after15-18
4		1.09841	1.23805	after15-18		59.6925	45.7219	after15-18		40.1055	54.2781	after15-18		0.178253	0	after15-18		47.9954	29.0476	after15-18		0.365067	0.365884	after15-18
4		1.35953	0.527313	after15-18		36.9898	82.7328	after15-18		62.9656	17.2672	after15-18		0.0223263	0	after15-18		25.6262	62.2862	after15-18		0.518327	0.958985	after15-18
4		1.26272	0.581676	after15-18		44.471	75.4895	after15-18		55.4809	24.5105	after15-18		0.0913723	0	after15-18		48.964	38.289	after15-18		0.399532	0.175659	after15-18
4		3.06154	1.49353	after15-18		14.8451	60.0134	after15-18		84.7762	38.4461	after15-18		0.378728	1.54052	after15-18		37.3301	33.0408	after15-18		0.723623	0.152221	after15-18
means (event "after")
fish#1		3.44339	2.63498			12.0253	20.0868			85.9477	79.3502			2.02697	0.562959			45.4606	58.2897			0.812384	0.785511
fish#2		1.64638	1.54669			29.5277	28.0127			70.3535	71.965			0.118803	0.0222928			35.1262	31.6492			0.520983	0.405622
fish#3		2.04751	1.77781			13.3224	20.609			86.4548	79.2349			0.222791	0.156028			28.7657	23.9906			0.585464	0.483951
fish#4		1.50344	1.07071			45.5504	59.6271			54.2081	40.0599			0.241509	0.312964			51.1522	47.6732			0.494909	0.446477
